# Supplementary material for: Artificial intelligence mobile health platform for early detection of COVID-19 in quarantine subjects using a wearable biosensor: protocol for a randomised controlled trial
Source: PubMed Central journal article supplement — BMJ Open. 2020 Jul 22;10(7):e038555. doi: 10.1136/bmjopen-2020-038555 (PMC7380847; doi:10.1136/bmjopen-2020-038555), 2020-07-22
Supplement: bmjopen-2020-038555.draft_revisions.pdf [file bmjopen-2020-038555.draft_revisions.pdf]

# BMJ Open

BMJ Open is committed to open peer review. As part of this commitment we make the peer review history of every article we publish publicly available.

When an article is published we post the peer reviewers' comments and the authors' responses online. We also post the versions of the paper that were used during peer review. These are the versions that the peer review comments apply to.

The versions of the paper that follow are the versions that were submitted during the peer review process. They are not the versions of record or the final published versions. They should not be cited or distributed as the published version of this manuscript.

BMJ Open is an open access journal and the full, final, typeset and author-corrected version of record of the manuscript is available on our site with no access controls, subscription charges or pay-per-view fees (<http://bmjopen.bmj.com>).

If you have any questions on BMJ Open's open peer review process please email [info.bmjopen@bmj.com](mailto:info.bmjopen@bmj.com)

# BMJ Open

## Protocol for Randomized Controlled Trial of Artificial Intelligence Mobile Health Platform for Early Detection of COVID-19 in Quarantine Subjects using Wearable Physiology Biosensor

|                               |                                                                                                                                                                                                                                                                                                                                                                                                                                                                                                                                                                                                                                                                                                                                                                                                                                                                                                                                                                                                                                                                                                                                                      |
|-------------------------------|------------------------------------------------------------------------------------------------------------------------------------------------------------------------------------------------------------------------------------------------------------------------------------------------------------------------------------------------------------------------------------------------------------------------------------------------------------------------------------------------------------------------------------------------------------------------------------------------------------------------------------------------------------------------------------------------------------------------------------------------------------------------------------------------------------------------------------------------------------------------------------------------------------------------------------------------------------------------------------------------------------------------------------------------------------------------------------------------------------------------------------------------------|
| Journal:                      | <i>BMJ Open</i>                                                                                                                                                                                                                                                                                                                                                                                                                                                                                                                                                                                                                                                                                                                                                                                                                                                                                                                                                                                                                                                                                                                                      |
| Manuscript ID                 | bmjopen-2020-038555                                                                                                                                                                                                                                                                                                                                                                                                                                                                                                                                                                                                                                                                                                                                                                                                                                                                                                                                                                                                                                                                                                                                  |
| Article Type:                 | Protocol                                                                                                                                                                                                                                                                                                                                                                                                                                                                                                                                                                                                                                                                                                                                                                                                                                                                                                                                                                                                                                                                                                                                             |
| Date Submitted by the Author: | 17-Mar-2020                                                                                                                                                                                                                                                                                                                                                                                                                                                                                                                                                                                                                                                                                                                                                                                                                                                                                                                                                                                                                                                                                                                                          |
| Complete List of Authors:     | <p>Wong, Chun Ka; University of Hong Kong, Division of Cardiology, Department of Medicine</p> <p>Ho, Deborah Tip-Yin ; University of Hong Kong, Division of Infectious Diseases, Department of Medicine</p> <p>Tam, Anthony Raymond; University of Hong Kong, Division of Infectious Diseases, Department of Medicine</p> <p>Tam, Tammy Ka-Wae ; Center for Health Protection, Government of Hong Kong SAR</p> <p>zhou, Mi; University of Hong Kong, Division of Cardiology, Department of Medicine</p> <p>LAU, Yuk-Ming; University of Hong Kong, Division of Cardiology, Department of Medicine</p> <p>Tang, Milky Oi-Yan; University of Hong Kong, Division of Infectious Diseases, Department of Medicine</p> <p>Tong, Raymond Cheuk-Fung; Harmony Medical Inc.</p> <p>Rajput, Kuldeep Singh ; Biofourmis</p> <p>Chen, Gengbo; Biofourmis, Research and Development</p> <p>Chan, Soon-Chee; Biofourmis, Research and Development</p> <p>SIU, Chung-Wah; University of Hong Kong, Division of Cardiology, Department of Medicine</p> <p>Hung, Ivan Fan-Ngai; University of Hong Kong, Division of Infectious Diseases, Department of Medicine</p> |
| Keywords:                     | Infection control < INFECTIOUS DISEASES, VIROLOGY, Telemedicine < BIOTECHNOLOGY & BIOINFORMATICS                                                                                                                                                                                                                                                                                                                                                                                                                                                                                                                                                                                                                                                                                                                                                                                                                                                                                                                                                                                                                                                     |
|                               |                                                                                                                                                                                                                                                                                                                                                                                                                                                                                                                                                                                                                                                                                                                                                                                                                                                                                                                                                                                                                                                                                                                                                      |

SCHOLARONE™  
Manuscripts

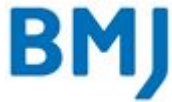

I, the Submitting Author has the right to grant and does grant on behalf of all authors of the Work (as defined in the below author licence), an exclusive licence and/or a non-exclusive licence for contributions from authors who are: i) UK Crown employees; ii) where BMJ has agreed a CC-BY licence shall apply, and/or iii) in accordance with the terms applicable for US Federal Government officers or employees acting as part of their official duties; on a worldwide, perpetual, irrevocable, royalty-free basis to BMJ Publishing Group Ltd ("BMJ") its licensees and where the relevant Journal is co-owned by BMJ to the co-owners of the Journal, to publish the Work in this journal and any other BMJ products and to exploit all rights, as set out in our [licence](#).

The Submitting Author accepts and understands that any supply made under these terms is made by BMJ to the Submitting Author unless you are acting as an employee on behalf of your employer or a postgraduate student of an affiliated institution which is paying any applicable article publishing charge ("APC") for Open Access articles. Where the Submitting Author wishes to make the Work available on an Open Access basis (and intends to pay the relevant APC), the terms of reuse of such Open Access shall be governed by a Creative Commons licence – details of these licences and which [Creative Commons](#) licence will apply to this Work are set out in our licence referred to above.

Other than as permitted in any relevant BMJ Author's Self Archiving Policies, I confirm this Work has not been accepted for publication elsewhere, is not being considered for publication elsewhere and does not duplicate material already published. I confirm all authors consent to publication of this Work and authorise the granting of this licence.

1  
2  
3  
4  
5  
6  
7  
8  
9

## **Protocol for Randomized Controlled Trial of Artificial Intelligence Mobile Health Platform for Early Detection of COVID-19 in Quarantine Subjects using Wearable Physiology Biosensor**

10  
11  
12  
13  
14  
15  
16  
17

<sup>1</sup>Chun-Ka Wong, MBBS; <sup>2</sup>Deborah Tip-Yin HO, MMedSc; <sup>2</sup>Anthony Raymond TAM, MBBS; <sup>3</sup>Tammy Ka-Wae TAM, MBBS; <sup>1</sup>Mi ZHOU, MBBS; <sup>1</sup>Yuk-Ming LAU, MBBS; <sup>2</sup>Milky Oi-Yan TANG, MSc; <sup>4</sup>Raymond Cheuk-Fung TONG, MD, PhD; <sup>5</sup>Kuldeep Singh Rajput; <sup>6</sup>Gengbo Chen, PhD; <sup>6</sup>Soon-Chee Chan; <sup>1</sup>Chung-Wah SIU, MD; and <sup>2</sup>Ivan Fan-Ngai HUNG, MD.

18  
19  
20  
21  
22  
23  
24  
25  
26  
27  
28

Affiliations: <sup>1</sup>Division of Cardiology, Department of Medicine, the University of Hong Kong, Hong Kong SAR, China; <sup>2</sup>Division of Infectious Diseases, Department of Medicine, the University of Hong Kong, Hong Kong SAR, China; <sup>3</sup>Centre of Health Protection, Department of Health, Government of Hong Kong SAR, Hong Kong SAR, China; <sup>4</sup>Harmony Medical Inc., Hong Kong SAR, China; <sup>5</sup>Biofourmis, Singapore; <sup>6</sup>Research and Development, Biofourmis, Singapore.

29  
30

**Protocol Version:** COVID19\_Wearable\_1

31  
32

**Protocol Date:** March 13, 2020

33  
34

**Keywords:** COVID-19, Quarantine, Wearable Device, Remote Monitoring

35  
36

**Wordcount:** 2508

37  
38

Address for Correspondence:

39  
40

Chung-Wah SIU, MD

41  
42  
43  
44  
45  
46  
47  
48

Cardiology Division,  
Department of Medicine,  
The University of Hong Kong,  
Hong Kong SAR, China.  
Tel: (852) 2255 4694,  
Fax: (852) 2818 6304,  
E-mail: [cwdsiu@hku.hk](mailto:cwdsiu@hku.hk)

49  
50  
51  
52  
53  
54  
55  
56  
57  
58  
59  
60

Division of Infectious Diseases,  
Department of Medicine,  
The University of Hong Kong,  
Hong Kong SAR, China.  
Tel: (852) 2255 4049,  
Fax: (852) 2818 6304,  
E-mail: [ivanhung@hku.hk](mailto:ivanhung@hku.hk)

## ABSTRACT

**Introduction:** There is an outbreak of Coronavirus Disease 2019 (COVID-19) worldwide. To date, there is no specific therapy or vaccine, thereby rigorous implementation of traditional public health measures including isolation and quarantine remain the most effective tools to control the outbreak. Current quarantine approach for asymptomatic individuals with COVID-19 contacts requires temperature and symptom surveillance. The intermittent nature and high dependency on self-discipline of the approach undermine its practicality. Advances in multi-sensor technologies made it possible to continuously monitor physiological parameters using wearable biosensors with a variety of form-factors.

**Objective:** To explore the potential of continuous multi-parameter physiological monitoring using a wearable biosensor in detecting early clinical progression of COVID-19.

**Method:** This randomized controlled open-labelled trial will involve 200 to 1,000 asymptomatic subjects with close COVID-19 contact under mandatory quarantine at designated facilities in Hong Kong. Subjects will be randomized to receive a remote monitoring strategy (intervention group) or standard strategy (control group) in a 1:1 ratio during the 14 day-quarantine period. In addition to fever and symptom surveillance in the control, subjects in the intervention group will wear a wearable biosensor on their arm to continuously monitor skin temperature, respiratory rate, blood pressure, pulse rate, blood oxygen saturation and daily activities, which is transferred in real time via Bluetooth to a smartphone application called Biovitals® Sentinel. The data is then processed using a cloud-based multi-variate physiology analytics engine

1  
2  
3 called Biovitals® to detect subtle physiology changes which is displayed on a web-  
4 based dashboard for clinicians review. The primary outcome is the time to diagnosis of  
5  
6  
7  
8 COVID-19.  
9

10  
11  
12 **Ethics and Dissemination:** Applied for approval from institutional review board at the  
13  
14 study sites. Results will be published in peer-reviewed journals.  
15  
16

17  
18  
19 **Conclusion:** The study will provide essential information about the potential of remote  
20  
21 multi-sensor physiological monitoring using wearable biosensor in COVID-19  
22  
23 outbreak control.  
24  
25  
26  
27  
28  
29  
30  
31  
32  
33  
34  
35  
36  
37  
38  
39  
40  
41  
42  
43  
44  
45  
46  
47  
48  
49  
50  
51  
52  
53  
54  
55  
56  
57  
58  
59  
60

### STRENGTHS AND LIMITATIONS OF THIS STUDY

- Automatic physiological data collection by wearable biosensor that do not rely on self-discipline of quarantined subjects.
- Large number of physiological parameters monitored, including skin temperature, respiratory rate, blood pressure, pulse rate, blood oxygen saturation and daily activities, instead of relying solely on temperature measurement.
- Continuous data collection and analysis throughout the day.
- Limited by being single-center based and exploratory in nature.

## INTRODUCTION

1  
2  
3  
4  
5  
6  
7  
8  
9  
10  
11  
12  
13  
14  
15  
16  
17  
18  
19  
20  
21  
22  
23  
24  
25  
26  
27  
28  
29  
30  
31  
32  
33  
34  
35  
36  
37  
38  
39  
40  
41  
42  
43  
44  
45  
46  
47  
48  
49  
50  
51  
52  
53  
54  
55  
56  
57  
58  
59  
60

Coronavirus Disease 2019 (COVID-19) emerged in December 2019,(1-4) and in mere few months has spread to more than 104 countries, resulting in an outbreak of viral pneumonia worldwide. As of March 12, 2020, the virus has reportedly caused 127,863 infections and 4,718 deaths globally.(5) The World Health Organization (WHO) declared COVID-19 a public health emergency of international concern on January 30, 2020 and further characterized it as pandemic on March 11, 2020. As there has yet been specific therapeutic or vaccine for the condition, rigorous implementation of traditional public health measures including isolation, quarantine, social distancing, and community containment is the principle strategy to control the COVID-19 epidemic.(6) In addition to isolation of confirmed COVID-19 infected patients from non-infected population, it is equally if not more important to quarantine asymptomatic individuals with possible exposure to COVID-19 in order to reduce the viral spread. Indeed, quarantine measures have been initiated in many countries and regions, which restrict movements of asymptomatic individuals with COVID-19 exposure often with fever and symptom surveillance at home or designated facilities for the presumed incubation period (14 days). While conceptually attractive, the intermittency and high dependency of self-discipline for body temperature and symptom surveillance undermine the practicality and effectiveness of the approach. Furthermore, it has been reported that as many as 50% of COVID-19 infected patients had not had fever until the full-blown disease,(3, 7) thereby body temperature surveillance *per se* may not be sufficient to detect early disease progression.

In the past few decades, advances in sensor technology miniaturize electronic physiological sensors that could be incorporated into wearable devices allowing



1  
2  
3 continuous monitoring of physiological parameters such as skin temperature, heart rate,  
4 respiratory rate, oxygen saturation, perspiration and activity of ambulatory subjects in  
5 a 24/7 basis.(8, 9) Together with current telecommunication platform capable of  
6 instantaneous and multi-directional massive data transfer, it is possible to remotely  
7 monitor a large number of individual subjects' physiological parameters in a real-time  
8 manner, and relay to managing physicians for timely intervention. Nonetheless, such  
9 potentials have not been fully explored in the real-world disease management. The  
10 current study will assess the impact of remote continuous monitoring in asymptomatic  
11 subjects with COVID-19 exposure under mandatory quarantine at designated facilities  
12 in Hong Kong using Biovitals® Sentinel Platform. The platform consists of continuous  
13 real-time physiological monitoring using a clinical-grade wearable biosensor worn on  
14 the upper arm called Everion® (Biofourmis, Singapore) and an artificial intelligence-  
15 powered physiology analytical platform Biovitals® (Biofourmis, Singapore) to detect  
16 progression of disease. The research hypothesis is that the continuous physiological  
17 data collected using Biovitals® Sentinel and the patient reported outcomes will be  
18 processed through a cloud-based analytics platform, Biovitals® that will be able to  
19 detect physiology changes (and other clinically meaningful alerts) which would  
20 indicate early clinical progression in quarantined subjects with COVID-19 exposure.  
21  
22  
23  
24  
25  
26  
27  
28  
29  
30  
31  
32  
33  
34  
35  
36  
37  
38  
39  
40  
41  
42  
43  
44  
45  
46

## 47 **METHODS AND ANALYSIS**

48  
49 This clinical trial protocol follows the Standard Protocol Items: Recommendations for  
50 Interventional Trials (SPIRIT).(10, 11) The underlying protocol follows the  
51 Consolidated Standards of Reporting Trials (CONSORT).(12, 13) Registration on  
52 clinicaltrials.gov has been submitted and pending approval.  
53  
54  
55  
56  
57  
58  
59  
60

## Study Design and Participants

This is a prospective, randomized controlled, open-labeled study. Asymptomatic subjects with COVID-19 exposure at designated facilities under the compulsory quarantine measure introduced on February 8, 2020 in Hong Kong, fulfilling inclusion and exclusion criteria of the study will be invited to participate in this study. Table 1 summarizes the inclusion and exclusion criteria.

There will be 2 phases of the subject recruitment. The initial run-in phase is a single arm, open-label study design confirmation phase with approximately 100 subjects. All subjects will undergo remote physiological monitoring using Biovitals® Sentinel platform. The data collected from the platform and clinical data from health system will be used to validate the solution and the study design for the randomized phase. In the subsequent randomized phase, subjects will be randomized in a 1:1 ratio to (1) Continuous remote physiological monitoring using Biovitals® Sentinel platform (Intervention group) or (2) Usual care (Control group) during the 14 day-quarantine period. (Figure 1)

In addition to daily body temperature monitoring and symptom surveillance in the Control group, subjects randomized to the Intervention group will wear a multi-sensor-based wearable armband biosensor, Everion®, during the quarantine period. Everion® is a wearable vital sign monitor capable to track heart rate, heart rate variability, blood oxygen saturation, blood pulse wave, respiration rate under rest, skin blood perfusion, activity, steps, skin temperature, barometric pressure and electrodermal activity. The wearable monitors will be worn for 22-23 hours per day and be recharged while bathing or showering. In addition, patients will be instructed to

1  
2  
3 report their symptoms and record their cough sounds using the specially-designed  
4 smartphone application daily. The physiological parameters obtained will be  
5  
6 automatically transferred in real time through a specially-designed smartphone  
7  
8 application to secured cloud storage for processing using Biovitals® Analytics Engine  
9  
10 and display the results on a web-based clinicians dashboard for review. (Figure 2 and  
11  
12 Figure 3) Biovitals® Analytics Engine processed these multiple physiology parameters  
13  
14 and detects subtle physiology changes precursor to critical events thereby enabling  
15  
16 clinicians to review and intervene. As an additional safety measure specific alert  
17  
18 thresholds for individual physiological parameters have also been set. Study  
19  
20 investigators will remotely review individual subjects' physiological parameters every  
21  
22 4 hours, and order diagnostic tests for COVID-19 infection through instant  
23  
24 communication (electronic communication and/or phone). In addition, after initial run-  
25  
26 in phase together with adequate number of confirmed COVID-19, physiological data  
27  
28 will be used to enhance Biovitals® prediction model for COVID-19 infection using  
29  
30 machine learning technology.  
31  
32  
33  
34  
35  
36  
37  
38  
39

### 40 **Outcomes**

41  
42 The primary outcome measure is the time to detection of COVID-19 infection using  
43  
44 nasopharyngeal sampling for COVID-19 RT-PCR.  
45  
46  
47  
48

49 The secondary outcomes include wearable device adherence, sensitivity and specificity  
50  
51 of Biovitals® Sentinel in identifying COVID-19 subjects, viral load of COVID-19  
52  
53 using nasopharyngeal sampling for RT-PCR at diagnosis, cross-infection rate within  
54  
55 family cluster, length of hospital stay, length of intensive care unit stay, non-invasive  
56  
57  
58  
59  
60

1  
2  
3 and invasive ventilation use, National Early Warning Score 2, worsening of  
4  
5 comorbidities and mortality.  
6  
7  
8  
9

### 10 **Sample size and statistical analysis**

11  
12 Sample size for the randomization phase will be determined based on the result from  
13  
14 the phase I run-in period involving approximately 100 subjects. Data normality of  
15  
16 continuous variables will be assessed using skewness statistics. Baseline characteristics  
17  
18 of the two study groups will be compared using ANOVA, chi-square or Fisher's exact  
19  
20 tests, as appropriate. Analysis of the primary and secondary outcomes will conform to  
21  
22 the intention-to-treat principle. Cox regression analysis will be performed to  
23  
24 compare the time to diagnosis of COVID-19 infection between the study groups  
25  
26 with adjustment for potential confounders. For other secondary outcomes, the  
27  
28 generalized estimating equations model will be used to compare the differential changes  
29  
30 in each of the outcomes across the 14-day time points between the two study arms, with  
31  
32 adjustment for the potential confounders.  
33  
34  
35  
36  
37  
38  
39

### 40 **Randomization**

41  
42 Patients will be randomized to Intervention group or Control group using a computer-  
43  
44 generated random number to derive allocation sequence prior to enrollment in the study.  
45  
46 Study staff responsible for enrollment will be informed of randomization assignment  
47  
48 after entering information of subjects to a designated computer system. For any subject  
49  
50 found to be ineligible for the study after randomization, the original assignment will be  
51  
52 re-assigned to the next eligible subject. Subjects and clinicians will not be blinded to  
53  
54 the randomization assignment. Data staff responsible for data entry will be blinded from  
55  
56 randomization assignment.  
57  
58  
59  
60

### **Data collection and management**

After enrollment, each subject will be assigned a unique identifier to be used in database.

Data will be entered by study staff and data accuracy will be verified by study principal investigator. Data quality control measures include queries to identify missing data, outliers and discrepancies. The database will be password protected and encrypted. Only study staff will have access to the database. Subjects who withdraw from the study will have continuous monitoring stopped, usual care continued and final outcome collected for analysis.

### **Data monitoring**

Due to the minimal risk nature of the study, there is no external data and safety monitoring board. The principal investigator and study staff will monitor data internally and meet weekly in person or by phone to ensure the study is being proceeded as intended.

### **Patient and public involvement**

We received input from quarantined individuals and healthcare providers which guided the design of the current study and choice of research questions. No quarantined individuals or the public were directly involved in the design of the study and choice of outcome measures. No quarantined individuals or the public will be involved in recruitment or conduct of the study. Results of the study will be disseminated to subjects, the public and the scientific community.

## **ETHICS AND DISSEMINATION**

1  
2  
3 The investigation conforms with the principles outlined in the Declaration of Helsinki.  
4  
5 The study protocol has been approved by the Institutional Review Board of The  
6  
7 University of Hong Kong, and Hong Kong West Cluster, Hospital Authority, Hong  
8  
9 Kong. Pending approval from the Institutional Review Board of the Department of  
10  
11 Health, Hong Kong SAR Government, Hong Kong SAR, China. Written informed  
12  
13 consents will be obtained from all study participants by study staff responsible  
14  
15 for recruitment. Important protocol modifications will be conveyed to  
16  
17 investigators, Institutional Review Board, trial registries, regulators, journals and trial  
18  
19 participants. After enrollment, each subject will be assigned a unique identifier to be  
20  
21 used in database. Personal identity of subjects will not be used for any public purpose,  
22  
23 publication, or transmitted outside of the study team.  
24  
25  
26  
27  
28  
29  
30

31 Dataset used during the study will be available from the corresponding author on  
32  
33 reasonable request. Collaboration with other investigators interested in optimizing  
34  
35 quarantine strategies for COVID-19 will be welcomed. The results of the trial will be  
36  
37 published in peer-reviewed journals and presented in conferences.  
38  
39  
40  
41

## 42 **DISCUSSION**

43  
44 Emerging in December 2019, the COVID-19 has spread at a rate far outstripping the  
45  
46 capacity of many medical systems.(14) Traditionally, public health measures including  
47  
48 isolation and quarantine are the cornerstone to curb the spread of infectious diseases by  
49  
50 interrupting person-to-person transmission, and are particularly important when no  
51  
52 specific therapeutics or vaccines are available.(6) Indeed, early detection of infected  
53  
54 individuals amongst those with viral exposure followed by isolation would effectively  
55  
56  
57  
58  
59  
60

1  
2  
3 reduce overt viral shedding in the community; nonetheless, early detection can be  
4  
5 challenging.  
6  
7  
8  
9

10 Symptom and fever surveillance amongst individuals with COVID-19 exposure is a  
11 commonly used method to detect infected individuals in the absence of medical testing.  
12  
13 However, symptom declaration and intermittent body temperature measurement *per se*  
14 may not be sufficient to detect early disease progression. Indeed, up to 50% COVID-  
15 19 infected patients were so called “asymptomatic” and did not have fever until the full-  
16 blown disease. (7) Conceivably, while fever is one of cardinal symptoms specific for  
17 active infection, many other physiological alterations such as heart rate, respiratory rate,  
18 oxygen saturation, perspiration and so on may likewise indicate active infection.  
19  
20 However, practically speaking, they are more difficult to accurately measure without  
21 medical training.  
22  
23  
24  
25  
26  
27  
28  
29  
30  
31  
32  
33  
34

35 The intervention arm of current study differs from the existing symptom and fever  
36 surveillance-based quarantine program in several important aspects. The incorporation  
37 of a wide-range of physiological parameters instead of a single physiological parameter,  
38 intermittent body temperature, from skin temperature, heart rate, respiratory rate,  
39 oxygen saturation, motion activity, and so on collected on a 24/7 basis will provide a  
40 more accurate assessment of the individuals’ physiological changes and increase the  
41 chance for early detection of clinical progression. (9) At the same time, the use of  
42 contemporary mobile communication technology facilitates automatic collection and  
43 transfer of physiological data. This can enhance patient compliance with the monitoring  
44 system as well as greatly shorten the time between detection of an abnormality and  
45 consequent intervention. In the past decades, wearable technology has been  
46  
47  
48  
49  
50  
51  
52  
53  
54  
55  
56  
57  
58  
59  
60

1  
2  
3 increasingly used for medical diagnosis notably arrhythmia detection.(15-21) Indeed,  
4  
5 the wide array of physiological parameters and the massive continuous dynamic  
6  
7 physiological data particularly when analyzed in an integrative approach using artificial  
8  
9 intelligence technology, can in principle provide a much in-depth understanding of  
10  
11 disease process, thereby enhancing management. Nonetheless, such potentials have not  
12  
13 been fully explored in the real-world disease management. In short term, the results of  
14  
15 the current study may provide insights of the disease progression of COVID-19  
16  
17 infection and possible ways to reduce the disease spread. In long term, the study may  
18  
19 demonstrate an important example of how new technologies can be incorporated into  
20  
21 existing medical service.  
22  
23  
24  
25  
26  
27  
28  
29  
30  
31  
32  
33  
34  
35  
36  
37  
38  
39  
40  
41  
42  
43  
44  
45  
46  
47  
48  
49  
50  
51  
52  
53  
54  
55  
56  
57  
58  
59  
60



**Author Contributions:**

CWS, IFNH, CKW, RCFT and KSR contributed to the conception and design of the study. DTYH, ART, TKWT, MZ and MOYT contributed to the acquisition of data. Data analysis and interpretation will be conducted by CWS, IFNH, CKW, RCFT, KSR, GC, SCC and YML. CWS, IFNH and CKW wrote first draft of the protocol. ART, MZ and YML revised the protocol critically for important intellectual content. All authors have read and approved the final version of the manuscript to be published.

**Funding statement:**

None.

**Acknowledgement:**

The Everion® wearable devices are donated by Biofourmis Singapore, and Harmony Ltd. The mobile phone and cellular data are supported by PCCW Ltd.

**Declaration of interest:**

None.

1  
2  
3 **Legends:**  
4

5 Figure 1: Study flow.  
6

7  
8 Figure 2: (A) Wearable device and Home screen of the dedicated smartphone app; (B)  
9  
10 App screen for symptom surveillance; and (C) App screen for cough sound recording.  
11

12 Figure 3: Web-based dashboard for clinicians.  
13  
14  
15  
16  
17  
18  
19  
20  
21  
22  
23  
24  
25  
26  
27  
28  
29  
30  
31  
32  
33  
34  
35  
36  
37  
38  
39  
40  
41  
42  
43  
44  
45  
46  
47  
48  
49  
50  
51  
52  
53  
54  
55  
56  
57  
58  
59  
60

For peer review only

**Table 1. Inclusion and exclusion criteria**

|                                                                                                                                                                                                                                                                                                                                                                                                                                                    |
|----------------------------------------------------------------------------------------------------------------------------------------------------------------------------------------------------------------------------------------------------------------------------------------------------------------------------------------------------------------------------------------------------------------------------------------------------|
| <p><b><i>Inclusion criteria</i></b></p> <ul style="list-style-type: none"><li>• Age <math>\geq</math> 18 years</li><li>• Asymptomatic for COVID-19 pneumonia</li><li>• With close COVID-19 contact under mandatory quarantine at designated facilities in Hong Kong</li><li>• Voluntarily agrees to participate by providing written informed consent</li></ul>                                                                                    |
| <p><b><i>Exclusion criteria</i></b></p> <ul style="list-style-type: none"><li>• Symptoms suggestive of COVID-19 infection including fever, upper respiratory symptoms, and/or gastrointestinal symptoms at recruitment.</li><li>• Confirmed COVID-19 infection</li><li>• Planned laboratory test for COVID-19</li><li>• Inability or refusal to provide informed consent</li><li>• Lack of skills in operating simple electronic devices</li></ul> |

## REFERENCES

1. Li Q, Guan X, Wu P, Wang X, Zhou L, Tong Y, et al. Early Transmission Dynamics in Wuhan, China, of Novel Coronavirus-Infected Pneumonia. *N Engl J Med*. 2020.
2. Wu JT, Leung K, Leung GM. Nowcasting and forecasting the potential domestic and international spread of the 2019-nCoV outbreak originating in Wuhan, China: a modelling study. *Lancet*. 2020;395(10225):689-97.
3. Guan WJ, Ni ZY, Hu Y, Liang WH, Ou CQ, He JX, et al. Clinical Characteristics of Coronavirus Disease 2019 in China. *N Engl J Med*. 2020.
4. Chan JF, Yuan S, Kok KH, To KK, Chu H, Yang J, et al. A familial cluster of pneumonia associated with the 2019 novel coronavirus indicating person-to-person transmission: a study of a family cluster. *Lancet*. 2020;395(10223):514-23.
5. Dong E, Du H, Gardner L. An interactive web-based dashboard to track COVID-19 in real time. *Lancet Infect Dis*. 2020.
6. Hellewell J, Abbott S, Gimma A, Bosse NI, Jarvis CI, Russell TW, et al. Feasibility of controlling COVID-19 outbreaks by isolation of cases and contacts. *Lancet Glob Health*. 2020.
7. Kenji Mizumoto KK, Alexander Zarebski, Gerardo Chowell. Estimating the Asymptomatic Proportion of 2019 Novel Coronavirus onboard the Princess Cruises Ship, 2020. *medRxiv*. 2020.
8. van Vliet M, Donnelly JP, Potting CM, Blijlevens NM. Continuous non-invasive monitoring of the skin temperature of HSCT recipients. *Support Care Cancer*. 2010;18(1):37-42.
9. Pevnick JM, Birkeland K, Zimmer R, Elad Y, Kedan I. Wearable technology for cardiology: An update and framework for the future. *Trends Cardiovasc Med*. 2018;28(2):144-50.
10. Chan AW, Tetzlaff JM, Altman DG, Laupacis A, Gotzsche PC, Krleza-Jeric K, et al. SPIRIT 2013 statement: defining standard protocol items for clinical trials. *Ann Intern Med*. 2013;158(3):200-7.
11. Chan AW, Tetzlaff JM, Gotzsche PC, Altman DG, Mann H, Berlin JA, et al. SPIRIT 2013 explanation and elaboration: guidance for protocols of clinical trials. *BMJ*. 2013;346:e7586.
12. Altman DG, Schulz KF, Moher D, Egger M, Davidoff F, Elbourne D, et al. The revised CONSORT statement for reporting randomized trials: explanation and elaboration. *Ann Intern Med*. 2001;134(8):663-94.
13. Moher D, Schulz KF, Altman DG, Consort. The CONSORT statement: revised recommendations for improving the quality of reports of parallel group randomized trials. *BMC Med Res Methodol*. 2001;1:2.
14. Camps JA, Zuur C, Blokland JA, Broerse JJ, Pauwels EK. A breathing lung phantom for 81mKr lung ventilation studies its use in dosimetry and quality control. *Eur J Nucl Med*. 1988;14(11):529-32.
15. Guo Y, Wang H, Zhang H, Liu T, Liang Z, Xia Y, et al. Mobile Photoplethysmographic Technology to Detect Atrial Fibrillation. *J Am Coll Cardiol*. 2019;74(19):2365-75.
16. Perez MV, Mahaffey KW, Hedlin H, Rumsfeld JS, Garcia A, Ferris T, et al. Large-Scale Assessment of a Smartwatch to Identify Atrial Fibrillation. *N Engl J Med*. 2019;381(20):1909-17.
17. Poh MZ, Loddenkemper T, Swenson NC, Goyal S, Madsen JR, Picard RW. Continuous monitoring of electrodermal activity during epileptic seizures using a wearable sensor. *Conf Proc IEEE Eng Med Biol Soc*. 2010;2010:4415-8.
18. Poh MZ, Loddenkemper T, Reinsberger C, Swenson NC, Goyal S, Sabtala MC, et al. Convulsive seizure detection using a wrist-worn electrodermal activity and accelerometry biosensor. *Epilepsia*. 2012;53(5):e93-7.

- 1  
2  
3  
4  
5  
6  
7  
8  
9  
10  
11  
12  
13  
14  
15  
16  
17  
18  
19  
20  
21  
22  
23  
24  
25  
26  
27  
28  
29  
30  
31  
32  
33  
34  
35  
36  
37  
38  
39  
40  
41  
42  
43  
44  
45  
46  
47  
48  
49  
50  
51  
52  
53  
54  
55  
56  
57  
58  
59  
60
19. Chan PH, Wong CK, Pun L, Wong YF, Wong MM, Chu DW, et al. Diagnostic performance of an automatic blood pressure measurement device, Microlife WatchBP Home A, for atrial fibrillation screening in a real-world primary care setting. *BMJ Open*. 2017;7(6):e013685.
20. Chan PH, Wong CK, Pun L, Wong YF, Wong MM, Chu DW, et al. Head-to-Head Comparison of the AliveCor Heart Monitor and Microlife WatchBP Office AFIB for Atrial Fibrillation Screening in a Primary Care Setting. *Circulation*. 2017;135(1):110-2.
21. Chan PH, Wong CK, Poh YC, Pun L, Leung WW, Wong YF, et al. Diagnostic Performance of a Smartphone-Based Photoplethysmographic Application for Atrial Fibrillation Screening in a Primary Care Setting. *J Am Heart Assoc*. 2016;5(7).

For peer review only

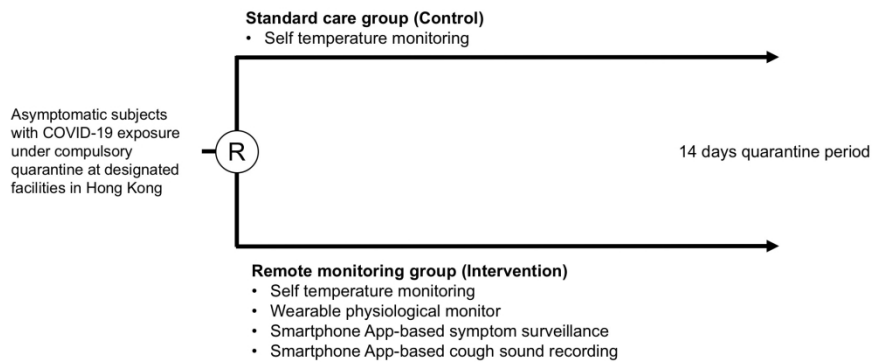

Primary endpoint: the time to detection of COVID-19 infection using nasopharyngeal sampling for COVID-19 RT-PCR

**Figure 1**

Figure 1: Study flow.

254x190mm (240 x 240 DPI)

A

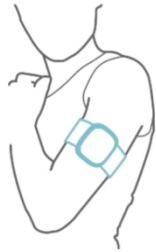

The armband wearable device will be worn for 22-23 hours per day and be recharged while bathing or showering.

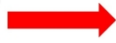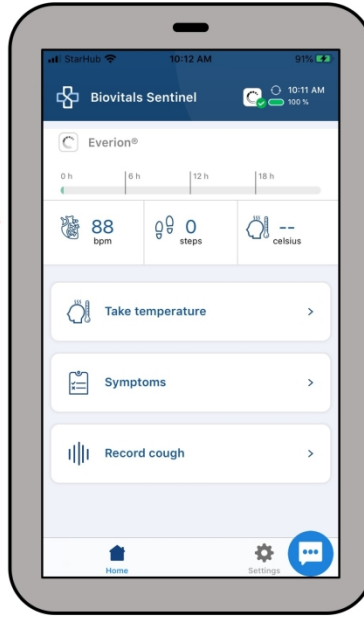

- Real-time physiological data display
- Body temperature measurement every 6 hours
- Symptom surveillance
- Daily cough sound recording

**Figure 2**

Figure 2: (A) Wearable device and Home screen of the dedicated smartphone app.

254x190mm (240 x 240 DPI)

B

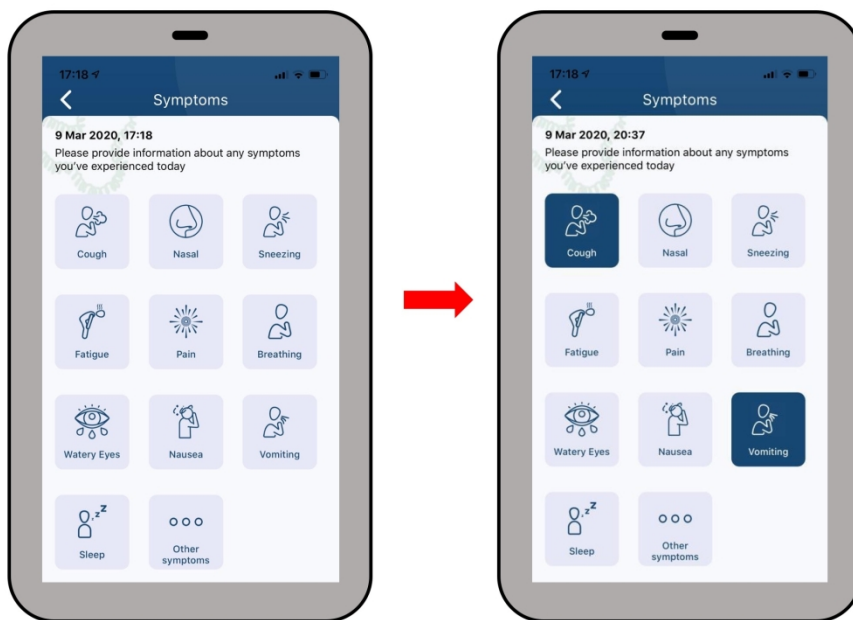

Figure 2

Figure 2: (B) App screen for symptom surveillance.

254x190mm (240 x 240 DPI)



1  
2  
3  
4  
5  
6  
7  
8  
9  
10  
11  
12  
13  
14  
15  
16  
17  
18  
19  
20  
21  
22  
23  
24  
25  
26  
27  
28  
29  
30  
31  
32  
33  
34  
35  
36  
37  
38  
39  
40  
41  
42  
43  
44  
45  
46  
47  
48  
49  
50  
51  
52  
53  
54  
55  
56  
57  
58  
59  
60

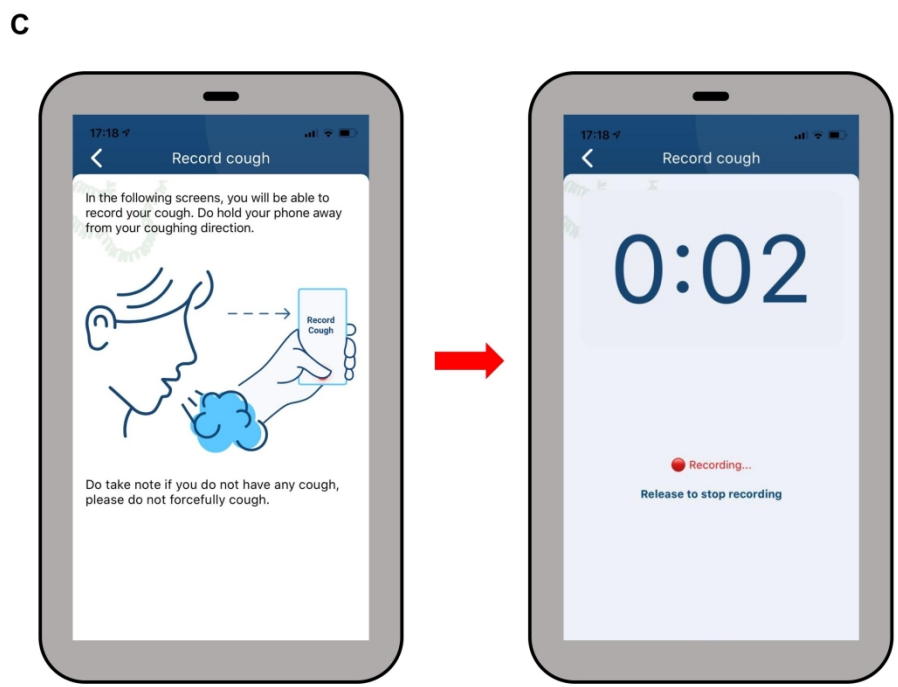

Figure 2

Figure 2: (C) App screen for cough sound recording.  
254x190mm (240 x 240 DPI)

1  
2  
3  
4  
5  
6  
7  
8  
9  
10  
11  
12  
13  
14  
15  
16  
17  
18  
19  
20  
21  
22  
23  
24  
25  
26  
27  
28  
29  
30  
31  
32  
33  
34  
35  
36  
37  
38  
39  
40  
41  
42  
43  
44  
45  
46  
47  
48  
49  
50  
51  
52  
53  
54  
55  
56  
57  
58  
59  
60

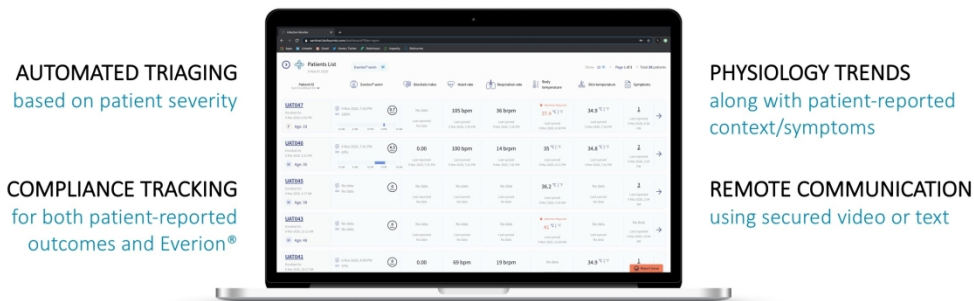

**Figure 3**

Figure 3: Web-based dashboard for clinicians.

254x190mm (240 x 240 DPI)

## SPIRIT 2013 Checklist: Recommended items to address in a clinical trial protocol and related documents

| Section/item                      | ItemNo | Description                                                                                                  | Page                        |
|-----------------------------------|--------|--------------------------------------------------------------------------------------------------------------|-----------------------------|
| <b>Administrative information</b> |        |                                                                                                              |                             |
| Title                             | 1      | Descriptive title identifying the study design, population, interventions, and, if applicable, trial acronym | 1                           |
| Trial registration                | 2a     | Trial identifier and registry name. If not yet registered, name of intended registry                         | 7                           |
|                                   | 2b     | All items from the World Health Organization Trial Registration Data Set                                     | Uploaded to BMJ Open server |
| Protocol version                  | 3      | Date and version identifier                                                                                  | 1                           |
| Funding                           | 4      | Sources and types of financial, material, and other support                                                  | 15                          |
| Roles and responsibilities        | 5a     | Names, affiliations, and roles of protocol contributors                                                      | 1, 15                       |
|                                   | 5b     | Name and contact information for the trial sponsor                                                           | 15                          |

|  |    |                                                                                                                                                                                                                                                                                          |            |
|--|----|------------------------------------------------------------------------------------------------------------------------------------------------------------------------------------------------------------------------------------------------------------------------------------------|------------|
|  | 5c | Role of study sponsor and funders, if any, in study design; collection, management, analysis, and interpretation of data; writing of the report; and the decision to submit the report for publication, including whether they will have ultimate authority over any of these activities | 15         |
|  | 5d | Composition, roles, and responsibilities of the coordinating centre, steering committee, endpoint adjudication committee, data management team, and other individuals or groups overseeing the trial, if applicable (see Item 21a for data monitoring committee)                         | 10, 11, 15 |

1  
2  
3  
4  
5  
6  
7  
8  
9  
10  
11  
12  
13  
14  
15  
16  
17  
18  
19  
20  
21  
22  
23  
24  
25  
26  
27  
28  
29  
30  
31  
32  
33  
34  
35  
36  
37  
38  
39  
40  
41  
42  
43  
44  
45  
46

|                          |    |                                                                                                                                                                                                           |     |
|--------------------------|----|-----------------------------------------------------------------------------------------------------------------------------------------------------------------------------------------------------------|-----|
| <b>Introduction</b>      |    |                                                                                                                                                                                                           |     |
| Background and rationale | 6a | Description of research question and justification for undertaking the trial, including summary of relevant studies (published and unpublished) examining benefits and harms for each intervention        | 5-6 |
|                          | 6b | Explanation for choice of comparators                                                                                                                                                                     | 5-6 |
| Objectives               | 7  | Specific objectives or hypotheses                                                                                                                                                                         | 6   |
| Trial design             | 8  | Description of trial design including type of trial (eg, parallel group, crossover, factorial, single group), allocation ratio, and framework (eg, superiority, equivalence, noninferiority, exploratory) | 7   |

| <b>Methods: Participants, interventions, and outcomes</b> |     |                                                                                                                                                                                                |            |
|-----------------------------------------------------------|-----|------------------------------------------------------------------------------------------------------------------------------------------------------------------------------------------------|------------|
| Study setting                                             | 9   | Description of study settings (eg, community clinic, academic hospital) and list of countries where data will be collected. Reference to where list of study sites can be obtained             | 7          |
| Eligibility criteria                                      | 10  | Inclusion and exclusion criteria for participants. If applicable, eligibility criteria for study centres and individuals who will perform the interventions (eg, surgeons, psychotherapists)   | 7, Table 1 |
| Interventions                                             | 11a | Interventions for each group with sufficient detail to allow replication, including how and when they will be administered                                                                     | 7-9        |
|                                                           | 11b | Criteria for discontinuing or modifying allocated interventions for a given trial participant (eg, drug dose change in response to harms, participant request, or improving/worsening disease) | N/A        |
|                                                           | 11c | Strategies to improve adherence to intervention protocols, and any procedures for monitoring adherence (eg, drug tablet return, laboratory tests)                                              | 7-9        |
|                                                           | 11d | Relevant concomitant care and interventions that are permitted or prohibited during the trial                                                                                                  | 7-9        |

|                      |    |                                                                                                                                                                                                                                                                                                                                                                                |             |
|----------------------|----|--------------------------------------------------------------------------------------------------------------------------------------------------------------------------------------------------------------------------------------------------------------------------------------------------------------------------------------------------------------------------------|-------------|
| Outcomes             | 12 | Primary, secondary, and other outcomes, including the specific measurement variable (eg, systolic blood pressure), analysis metric (eg, change from baseline, final value, time to event), method of aggregation (eg, median, proportion), and time point for each outcome. Explanation of the clinical relevance of chosen efficacy and harm outcomes is strongly recommended | 9           |
| Participant timeline | 13 | Time schedule of enrolment, interventions (including any run-ins and washouts), assessments, and visits for participants. A schematic diagram is highly recommended (see Figure)                                                                                                                                                                                               | 7, Figure 1 |
| Sample size          | 14 | Estimated number of participants needed to achieve study objectives and how it was determined, including clinical and statistical assumptions supporting any sample size calculations                                                                                                                                                                                          | 9           |
| Recruitment          | 15 | Strategies for achieving adequate participant enrolment to reach target sample size                                                                                                                                                                                                                                                                                            | 7           |

1  
2  
3  
4  
5  
6  
7  
8  
9  
10  
11  
12  
13  
14  
15  
16  
17  
18  
19  
20  
21  
22  
23  
24  
25  
26  
27  
28  
29  
30  
31  
32  
33  
34  
35  
36  
37  
38  
39  
40  
41  
42  
43  
44  
45  
46

|                                                                     |     |                                                                                                                                                                                                                                                                                                                                                          |    |
|---------------------------------------------------------------------|-----|----------------------------------------------------------------------------------------------------------------------------------------------------------------------------------------------------------------------------------------------------------------------------------------------------------------------------------------------------------|----|
| <b>Methods: Assignment of interventions (for controlled trials)</b> |     |                                                                                                                                                                                                                                                                                                                                                          |    |
| Allocation:                                                         |     |                                                                                                                                                                                                                                                                                                                                                          |    |
| Sequence generation                                                 | 16a | Method of generating the allocation sequence (eg, computer-generated random numbers), and list of any factors for stratification. To reduce predictability of a random sequence, details of any planned restriction (eg, blocking) should be provided in a separate document that is unavailable to those who enrol participants or assign interventions | 10 |
| Allocation concealment mechanism                                    | 16b | Mechanism of implementing the allocation sequence (eg, central telephone; sequentially numbered, opaque, sealed envelopes), describing any steps to conceal the sequence until interventions are assigned                                                                                                                                                | 10 |
| Implementation                                                      | 16c | Who will generate the allocation sequence, who will enrol participants, and who will assign participants to interventions                                                                                                                                                                                                                                | 10 |
| Blinding (masking)                                                  | 17a | Who will be blinded after assignment to interventions (eg, trial participants, care providers, outcome assessors, data analysts), and how                                                                                                                                                                                                                | 10 |



1  
2  
3  
4  
5  
6  
7  
8  
9  
10  
11  
12  
13  
14  
15  
16  
17  
18  
19  
20  
21  
22  
23  
24  
25  
26  
27  
28  
29  
30  
31  
32  
33  
34  
35  
36  
37  
38  
39  
40  
41  
42  
43  
44  
45  
46

|  |     |                                                                                                                                                      |     |
|--|-----|------------------------------------------------------------------------------------------------------------------------------------------------------|-----|
|  | 17b | If blinded, circumstances under which unblinding is permissible, and procedure for revealing a participant’s allocated intervention during the trial | N/A |
|--|-----|------------------------------------------------------------------------------------------------------------------------------------------------------|-----|

For peer review only

| <b>Methods: Data collection, management, and analysis</b> |     |                                                                                                                                                                                                                                                                                                                                                                                                              |       |
|-----------------------------------------------------------|-----|--------------------------------------------------------------------------------------------------------------------------------------------------------------------------------------------------------------------------------------------------------------------------------------------------------------------------------------------------------------------------------------------------------------|-------|
| Data collection methods                                   | 18a | Plans for assessment and collection of outcome, baseline, and other trial data, including any related processes to promote data quality (eg, duplicate measurements, training of assessors) and a description of study instruments (eg, questionnaires, laboratory tests) along with their reliability and validity, if known. Reference to where data collection forms can be found, if not in the protocol | 10-11 |
|                                                           | 18b | Plans to promote participant retention and complete follow-up, including list of any outcome data to be collected for participants who discontinue or deviate from intervention protocols                                                                                                                                                                                                                    | 10    |
| Data management                                           | 19  | Plans for data entry, coding, security, and storage, including any related processes to promote data quality (eg, double data entry; range checks for data values). Reference to where details of data management procedures can be found, if not in the protocol                                                                                                                                            | 10    |
| Statistical methods                                       | 20a | Statistical methods for analysing primary and secondary outcomes. Reference to where other details of the statistical analysis plan can be found, if not in the protocol                                                                                                                                                                                                                                     | 9     |

1  
2  
3  
4  
5  
6  
7  
8  
9  
10  
11  
12  
13  
14  
15  
16  
17  
18  
19  
20  
21  
22  
23  
24  
25  
26  
27  
28  
29  
30  
31  
32  
33  
34  
35  
36  
37  
38  
39  
40  
41  
42  
43  
44  
45  
46

|  |     |                                                                                                                                                                                 |   |
|--|-----|---------------------------------------------------------------------------------------------------------------------------------------------------------------------------------|---|
|  | 20b | Methods for any additional analyses (eg, subgroup and adjusted analyses)                                                                                                        | 9 |
|  | 20c | Definition of analysis population relating to protocol non-adherence (eg, as randomised analysis), and any statistical methods to handle missing data (eg, multiple imputation) | 9 |

For peer review only

| <b>Methods: Monitoring</b> |     |                                                                                                                                                                                                                                                                                                                                       |    |
|----------------------------|-----|---------------------------------------------------------------------------------------------------------------------------------------------------------------------------------------------------------------------------------------------------------------------------------------------------------------------------------------|----|
| Data monitoring            | 21a | Composition of data monitoring committee (DMC); summary of its role and reporting structure; statement of whether it is independent from the sponsor and competing interests; and reference to where further details about its charter can be found, if not in the protocol. Alternatively, an explanation of why a DMC is not needed | 11 |
|                            | 21b | Description of any interim analyses and stopping guidelines, including who will have access to these interim results and make the final decision to terminate the trial                                                                                                                                                               | 11 |
| Harms                      | 22  | Plans for collecting, assessing, reporting, and managing solicited and spontaneously reported adverse events and other unintended effects of trial interventions or trial conduct                                                                                                                                                     | 11 |
| Auditing                   | 23  | Frequency and procedures for auditing trial conduct, if any, and whether the process will be independent from investigators and the sponsor                                                                                                                                                                                           | 11 |

| <b>Ethics and dissemination</b> |     |                                                                                                                                                                                                                                  |    |
|---------------------------------|-----|----------------------------------------------------------------------------------------------------------------------------------------------------------------------------------------------------------------------------------|----|
| Research ethics approval        | 24  | Plans for seeking research ethics committee/institutional review board (REC/IRB) approval                                                                                                                                        | 11 |
| Protocol amendments             | 25  | Plans for communicating important protocol modifications (eg, changes to eligibility criteria, outcomes, analyses) to relevant parties (eg, investigators, REC/IRBs, trial participants, trial registries, journals, regulators) | 11 |
| Consent or assent               | 26a | Who will obtain informed consent or assent from potential trial participants or authorised surrogates, and how (see Item 32)                                                                                                     | 11 |
|                                 | 26b | Additional consent provisions for collection and use of participant data and biological specimens in ancillary studies, if applicable                                                                                            | 11 |
| Confidentiality                 | 27  | How personal information about potential and enrolled participants will be collected, shared, and maintained in order to protect confidentiality before, during, and after the trial                                             | 12 |
| Declaration of interests        | 28  | Financial and other competing interests for principal investigators for the overall trial and each study site                                                                                                                    | 15 |

|                               |     |                                                                                                                                                                                                                                                                                     |       |
|-------------------------------|-----|-------------------------------------------------------------------------------------------------------------------------------------------------------------------------------------------------------------------------------------------------------------------------------------|-------|
| Access to data                | 29  | Statement of who will have access to the final trial dataset, and disclosure of contractual agreements that limit such access for investigators                                                                                                                                     | 10-11 |
| Ancillary and post-trial care | 30  | Provisions, if any, for ancillary and post-trial care, and for compensation to those who suffer harm from trial participation                                                                                                                                                       | N/A   |
| Dissemination policy          | 31a | Plans for investigators and sponsor to communicate trial results to participants, healthcare professionals, the public, and other relevant groups (eg, via publication, reporting in results databases, or other data sharing arrangements), including any publication restrictions | 12    |
|                               | 31b | Authorship eligibility guidelines and any intended use of professional writers                                                                                                                                                                                                      | N/A   |
|                               | 31c | Plans, if any, for granting public access to the full protocol, participant-level dataset, and statistical code                                                                                                                                                                     | 12    |

1  
2  
3  
4  
5  
6  
7  
8  
9  
10  
11  
12  
13  
14  
15  
16  
17  
18  
19  
20  
21  
22  
23  
24  
25  
26  
27  
28  
29  
30  
31  
32  
33  
34  
35  
36  
37  
38  
39  
40  
41  
42  
43  
44  
45  
46

|                            |    |                                                                                                                                                                                                |     |
|----------------------------|----|------------------------------------------------------------------------------------------------------------------------------------------------------------------------------------------------|-----|
| <b>Appendices</b>          |    |                                                                                                                                                                                                |     |
| Informed consent materials | 32 | Model consent form and other related documentation given to participants and authorised surrogates                                                                                             | N/A |
| Biological specimens       | 33 | Plans for collection, laboratory evaluation, and storage of biological specimens for genetic or molecular analysis in the current trial and for future use in ancillary studies, if applicable | 9   |

\*It is strongly recommended that this checklist be read in conjunction with the SPIRIT 2013 Explanation & Elaboration for important clarification on the items. Amendments to the protocol should be tracked and dated. The SPIRIT checklist is copyrighted by the SPIRIT Group under the Creative Commons “Attribution-NonCommercial-NoDerivs 3.0 Unported” license.

## WHO Trial Registration Data Set

|                                                  |                                                                                                                                                                                                       |
|--------------------------------------------------|-------------------------------------------------------------------------------------------------------------------------------------------------------------------------------------------------------|
| 1. Primary Registry and Trial Identifying Number | Clinicaltrial.gov<br>Registration submitted, pending approval                                                                                                                                         |
| 2. Date of Registration in Primary Registry      | Clinicaltrial.gov<br>Registration submitted, pending approval                                                                                                                                         |
| 3. Secondary Identifying Numbers                 | None                                                                                                                                                                                                  |
| 4. Source(s) of Monetary or Material Support     | The Everion® wearable devices are donated by Biofourmis Singapore, and Harmony Ltd. The mobile phone and cellular data are supported by PCCW Ltd.                                                     |
| 5. Primary Sponsor                               | None                                                                                                                                                                                                  |
| 6. Secondary Sponsor(s)                          | None                                                                                                                                                                                                  |
| 7. Contact for Public Queries                    | Professor Ivan FN Hung MD<br>Division of Infectious Diseases,<br>Department of Medicine,<br>The University of Hong Kong,<br>Hong Kong SAR, China.<br><br>Tel: (852) 2255 4049<br>Fax: (852) 2818 6304 |



|                                               |                                                                                                                                                                                                                                                                                                                                          |
|-----------------------------------------------|------------------------------------------------------------------------------------------------------------------------------------------------------------------------------------------------------------------------------------------------------------------------------------------------------------------------------------------|
|                                               | E-mail: <a href="mailto:ivanhung@hku.hk">ivanhung@hku.hk</a>                                                                                                                                                                                                                                                                             |
| 8. Contact for Scientific Queries             | <p>Professor Ivan FN Hung MD<br/>         Division of Infectious Diseases,<br/>         Department of Medicine,<br/>         The University of Hong Kong,<br/>         Hong Kong SAR, China.</p> <p>Tel: (852) 2255 4049<br/>         Fax: (852) 2818 6304<br/>         E-mail: <a href="mailto:ivanhung@hku.hk">ivanhung@hku.hk</a></p> |
| 9. Public Title                               | Using Biovitals® Sentinel to Monitor Disease Progression in Subjects Quarantined for Suspected COVID-19                                                                                                                                                                                                                                  |
| 10. Scientific Title                          | Using Biovitals® Sentinel to Monitor Disease Progression in Subjects Quarantined for Suspected COVID-19                                                                                                                                                                                                                                  |
| 11. Countries of Recruitment                  | Hong Kong, China                                                                                                                                                                                                                                                                                                                         |
| 12. Health Condition(s) or Problem(s) Studied | Coronavirus Disease 2019 (COVID-19)                                                                                                                                                                                                                                                                                                      |
| 13. Intervention                              | <p><u>Intervention Arm:</u></p> <p>Continuous physiological monitoring using Biovitals platform including (1) Armband with multiple physiological sensor, (2) Remote monitoring, and (3) Analytic platform. The armband will be worn for 23 hours a day and off for 1 hour during showering for recharging the battery.</p>              |

|                                                 |                                                                                                                                                                                                                                                                                                                                                                                                                                                                                                                                                                                                                                                  |
|-------------------------------------------------|--------------------------------------------------------------------------------------------------------------------------------------------------------------------------------------------------------------------------------------------------------------------------------------------------------------------------------------------------------------------------------------------------------------------------------------------------------------------------------------------------------------------------------------------------------------------------------------------------------------------------------------------------|
|                                                 | <p><u>Control Arm:</u><br/>Standard Care</p>                                                                                                                                                                                                                                                                                                                                                                                                                                                                                                                                                                                                     |
| <p>14. Key Inclusion and Exclusion Criteria</p> | <p><u>Inclusion criteria:</u><br/>Age ≥ 18 years<br/>Asymptomatic for COVID-19 pneumonia<br/>With close COVID-19 contact under mandatory quarantine at designated facilities in Hong Kong<br/>Voluntarily agrees to participate by providing written informed consent</p> <p><u>Exclusion criteria:</u><br/>Symptoms suggestive of COVID-19 infection including fever, upper respiratory symptoms, and/or gastrointestinal symptoms at recruitment.<br/>Confirmed COVID-19 infection<br/>Planned laboratory test for COVID-19<br/>Inability or refusal to provide informed consent<br/>Lack of skills in operating simple electronic devices</p> |
| <p>15. Study Type</p>                           | <p>Study Type: Interventional<br/>Participants Allocation: Randomized (details in protocol manuscript)<br/>Intervention Model: Parallel Assignment</p>                                                                                                                                                                                                                                                                                                                                                                                                                                                                                           |

|                              |                                                                                                                                                                                                                                                                                                                                                                                                                                                                                       |
|------------------------------|---------------------------------------------------------------------------------------------------------------------------------------------------------------------------------------------------------------------------------------------------------------------------------------------------------------------------------------------------------------------------------------------------------------------------------------------------------------------------------------|
|                              | Masking: None (Open Label)<br>Primary Purpose: Diagnostic                                                                                                                                                                                                                                                                                                                                                                                                                             |
| 16. Date of First Enrollment | March 16, 2020                                                                                                                                                                                                                                                                                                                                                                                                                                                                        |
| 17. Target Sample Size       | 200 – 1000                                                                                                                                                                                                                                                                                                                                                                                                                                                                            |
| 18. Recruitment Status       | Pending                                                                                                                                                                                                                                                                                                                                                                                                                                                                               |
| 19. Primary Outcome(s)       | Time to diagnosis of COVID-19 by RT-PCR in subjects<br>Metric: Time from quarantine to diagnosis of COVID-19<br>Time Frame: within 14 days                                                                                                                                                                                                                                                                                                                                            |
| 20. Key Secondary Outcome(s) | 1. Compliance to complete the study<br>Metric: Percentage of device usage time<br>Time Frame: within 14 days<br><br>Sensitivity and specificity of Biovitals® Sentinel to identify COVID-19 positive subjects<br>Metric: Sensitivity and specificity of Biovitals® Sentinel to identify COVID-19 positive subjects<br>Time Frame: within 14 days<br><br>Viral load of COVID-19 positive subjects<br>Metric: COVID-19 viral load by RT-PCR<br>Time Frame: On day of COVID-19 diagnosis |

|    |                                                            |
|----|------------------------------------------------------------|
| 1  |                                                            |
| 2  |                                                            |
| 3  |                                                            |
| 4  |                                                            |
| 5  | Cross infection rate within the family cluster             |
| 6  | Metric: Percentage of family members infected              |
| 7  | Time Frame: within 14 days                                 |
| 8  |                                                            |
| 9  |                                                            |
| 10 |                                                            |
| 11 | Length of hospital stay of positive subjects               |
| 12 | Metric: Length of hospital stay                            |
| 13 | Time Frame: 1 year at study completion                     |
| 14 |                                                            |
| 15 |                                                            |
| 16 |                                                            |
| 17 |                                                            |
| 18 | Length of ICU stay of positive patients                    |
| 19 | Metric: Length of ICU stay                                 |
| 20 | Time Frame: 1 year at study completion                     |
| 21 |                                                            |
| 22 |                                                            |
| 23 |                                                            |
| 24 |                                                            |
| 25 | Non-invasive and invasive ventilatory support              |
| 26 | Metric: Percentage of COVID-19 positive patients requiring |
| 27 | non-invasive and invasive ventilatory support              |
| 28 | Time Frame: 1 year at study completion                     |
| 29 |                                                            |
| 30 |                                                            |
| 31 |                                                            |
| 32 |                                                            |
| 33 | National Early Warning Score 2 rating of COVID-19 positive |
| 34 | patients                                                   |
| 35 | Metric: National Early Warning Score 2 rating              |
| 36 | Time Frame: On day of COVID-19 diagnosis                   |
| 37 |                                                            |
| 38 |                                                            |
| 39 |                                                            |
| 40 |                                                            |
| 41 |                                                            |
| 42 |                                                            |
| 43 |                                                            |
| 44 |                                                            |
| 45 |                                                            |
| 46 |                                                            |

1  
2  
3  
4  
5  
6  
7  
8  
9  
10  
11  
12  
13  
14  
15  
16  
17  
18  
19  
20  
21  
22  
23  
24  
25  
26  
27  
28  
29  
30  
31  
32  
33  
34  
35  
36  
37  
38  
39  
40  
41  
42  
43  
44  
45  
46

|  |                                        |
|--|----------------------------------------|
|  | Worsening of comorbidities             |
|  | Metric: Worsening of comorbidities     |
|  | Time Frame: 1 year at study completion |
|  | Mortality                              |
|  | Metric: Mortality                      |
|  | Time Frame: 1 year at study completion |

For peer review only

# BMJ Open

## Protocol for Randomized Controlled Trial of Artificial Intelligence Mobile Health Platform for Early Detection of COVID-19 in Quarantine Subjects using Wearable Physiology Biosensor

|                                 |                                                                                                                                                                                                                                                                                                                                                                                                                                                                                                                                                                                                                                                                                                                                                                                                                                                                                                                                                                                                              |
|---------------------------------|--------------------------------------------------------------------------------------------------------------------------------------------------------------------------------------------------------------------------------------------------------------------------------------------------------------------------------------------------------------------------------------------------------------------------------------------------------------------------------------------------------------------------------------------------------------------------------------------------------------------------------------------------------------------------------------------------------------------------------------------------------------------------------------------------------------------------------------------------------------------------------------------------------------------------------------------------------------------------------------------------------------|
| Journal:                        | <i>BMJ Open</i>                                                                                                                                                                                                                                                                                                                                                                                                                                                                                                                                                                                                                                                                                                                                                                                                                                                                                                                                                                                              |
| Manuscript ID                   | bmjopen-2020-038555.R1                                                                                                                                                                                                                                                                                                                                                                                                                                                                                                                                                                                                                                                                                                                                                                                                                                                                                                                                                                                       |
| Article Type:                   | Protocol                                                                                                                                                                                                                                                                                                                                                                                                                                                                                                                                                                                                                                                                                                                                                                                                                                                                                                                                                                                                     |
| Date Submitted by the Author:   | 13-May-2020                                                                                                                                                                                                                                                                                                                                                                                                                                                                                                                                                                                                                                                                                                                                                                                                                                                                                                                                                                                                  |
| Complete List of Authors:       | Wong, Chun Ka; University of Hong Kong, Division of Cardiology, Department of Medicine<br>Ho, Deborah Tip-Yin ; University of Hong Kong, Division of Infectious Diseases, Department of Medicine<br>Tam, Anthony Raymond; University of Hong Kong, Division of Infectious Diseases, Department of Medicine<br>zhou, Mi; University of Hong Kong, Division of Cardiology, Department of Medicine<br>LAU, Yuk-Ming; University of Hong Kong, Division of Cardiology, Department of Medicine<br>Tang, Milky Oi-Yan; University of Hong Kong, Division of Infectious Diseases, Department of Medicine<br>Tong, Raymond Cheuk-Fung; Harmony Medical Inc.<br>Rajput, Kuldeep Singh ; Biofourmis<br>Chen, Gengbo; Biofourmis, Research and Development<br>Chan, Soon-Chee; Biofourmis, Research and Development<br>SIU, Chung-Wah; University of Hong Kong, Division of Cardiology, Department of Medicine<br>Hung, Ivan Fan-Ngai; University of Hong Kong, Division of Infectious Diseases, Department of Medicine |
| <b>Primary Subject Heading</b>: | Infectious diseases                                                                                                                                                                                                                                                                                                                                                                                                                                                                                                                                                                                                                                                                                                                                                                                                                                                                                                                                                                                          |
| Secondary Subject Heading:      | Public health                                                                                                                                                                                                                                                                                                                                                                                                                                                                                                                                                                                                                                                                                                                                                                                                                                                                                                                                                                                                |
| Keywords:                       | Infection control < INFECTIOUS DISEASES, VIROLOGY, Telemedicine < BIOTECHNOLOGY & BIOINFORMATICS                                                                                                                                                                                                                                                                                                                                                                                                                                                                                                                                                                                                                                                                                                                                                                                                                                                                                                             |
|                                 |                                                                                                                                                                                                                                                                                                                                                                                                                                                                                                                                                                                                                                                                                                                                                                                                                                                                                                                                                                                                              |

SCHOLARONE™  
Manuscripts



I, the Submitting Author has the right to grant and does grant on behalf of all authors of the Work (as defined in the below author licence), an exclusive licence and/or a non-exclusive licence for contributions from authors who are: i) UK Crown employees; ii) where BMJ has agreed a CC-BY licence shall apply, and/or iii) in accordance with the terms applicable for US Federal Government officers or employees acting as part of their official duties; on a worldwide, perpetual, irrevocable, royalty-free basis to BMJ Publishing Group Ltd ("BMJ") its licensees and where the relevant Journal is co-owned by BMJ to the co-owners of the Journal, to publish the Work in this journal and any other BMJ products and to exploit all rights, as set out in our [licence](#).

The Submitting Author accepts and understands that any supply made under these terms is made by BMJ to the Submitting Author unless you are acting as an employee on behalf of your employer or a postgraduate student of an affiliated institution which is paying any applicable article publishing charge ("APC") for Open Access articles. Where the Submitting Author wishes to make the Work available on an Open Access basis (and intends to pay the relevant APC), the terms of reuse of such Open Access shall be governed by a Creative Commons licence – details of these licences and which [Creative Commons](#) licence will apply to this Work are set out in our licence referred to above.

Other than as permitted in any relevant BMJ Author's Self Archiving Policies, I confirm this Work has not been accepted for publication elsewhere, is not being considered for publication elsewhere and does not duplicate material already published. I confirm all authors consent to publication of this Work and authorise the granting of this licence.

1  
2  
3  
4  
5  
6  
7  
8  
9

## **Protocol for Randomized Controlled Trial of Artificial Intelligence Mobile Health Platform for Early Detection of COVID-19 in Quarantine Subjects using Wearable Physiology Biosensor**

10  
11  
12  
13  
14  
15  
16  
17

<sup>1</sup>Chun-Ka Wong, MBBS; <sup>2</sup>Deborah Tip-Yin HO, MMedSc; <sup>2</sup>Anthony Raymond TAM, MBBS; <sup>1</sup>Mi ZHOU, MBBS; <sup>1</sup>Yuk-Ming LAU, MBBS; <sup>2</sup>Milky Oi-Yan TANG, MSc; <sup>3</sup>Raymond Cheuk-Fung TONG, MD, PhD; <sup>4</sup>Kuldeep Singh Rajput; <sup>5</sup>Gengbo Chen, PhD; <sup>5</sup>Soon-Chee Chan; <sup>1</sup>Chung-Wah SIU, MD; and <sup>2</sup>Ivan Fan-Ngai HUNG, MD.

18  
19  
20  
21  
22  
23  
24  
25  
26  
27

Affiliations: <sup>1</sup>Division of Cardiology, Department of Medicine, the University of Hong Kong, Hong Kong SAR, China; <sup>2</sup>Division of Infectious Diseases, Department of Medicine, the University of Hong Kong, Hong Kong SAR, China; <sup>3</sup>Harmony Medical Inc., Hong Kong SAR, China; <sup>4</sup>Biofourmis, Singapore; <sup>5</sup>Research and Development, Biofourmis, Singapore.

28  
29  
30  
31  
32  
33

**Protocol Version:** COVID19\_Wearable\_1

**Protocol Date:** March 13, 2020

**Keywords:** COVID-19, Quarantine, Wearable Device, Remote Monitoring

**Wordcount:** 2686

34  
35  
36  
37  
38  
39  
40  
41  
42  
43  
44  
45  
46  
47

Address for Correspondence:

Chung-Wah SIU, MD

Cardiology Division,  
Department of Medicine,  
The University of Hong Kong,  
Hong Kong SAR, China.  
Tel: (852) 2255 4694,  
Fax: (852) 2818 6304,  
E-mail: [cwdsiu@hku.hk](mailto:cwdsiu@hku.hk)

48  
49  
50  
51  
52  
53  
54  
55  
56  
57  
58  
59  
60

Division of Infectious Diseases,  
Department of Medicine,  
The University of Hong Kong,  
Hong Kong SAR, China.  
Tel: (852) 2255 4049,  
Fax: (852) 2818 6304,  
E-mail: [ivanhung@hku.hk](mailto:ivanhung@hku.hk)



## ABSTRACT

**Introduction:** There is an outbreak of Coronavirus Disease 2019 (COVID-19) worldwide. To date, there is no specific therapy or vaccine, thereby rigorous implementation of traditional public health measures including isolation and quarantine remain the most effective tools to control the outbreak. Current quarantine approach for asymptomatic individuals with COVID-19 contacts requires temperature and symptom surveillance. The intermittent nature and high dependency on self-discipline of the approach undermine its practicality. Advances in multi-sensor technologies made it possible to continuously monitor physiological parameters using wearable biosensors with a variety of form-factors.

**Objective:** To explore the potential of continuous multi-parameter physiological monitoring using a wearable biosensor in detecting early clinical progression of COVID-19.

**Method:** This randomized controlled open-labelled trial will involve 200 to 1,000 asymptomatic subjects with close COVID-19 contact under mandatory quarantine at designated facilities in Hong Kong. Subjects will be randomized to receive a remote monitoring strategy (intervention group) or standard strategy (control group) in a 1:1 ratio during the 14 day-quarantine period. In addition to fever and symptom surveillance in the control, subjects in the intervention group will wear a wearable biosensor on their arm to continuously monitor skin temperature, respiratory rate, blood pressure, pulse rate, blood oxygen saturation and daily activities, which is transferred in real time via Bluetooth to a smartphone application called Biovitals® Sentinel. The data is then processed using a cloud-based multi-variate physiology analytics engine

1  
2  
3 called Biovitals® to detect subtle physiology changes which is displayed on a web-  
4 based dashboard for clinicians review. The primary outcome is the time to diagnosis of  
5 COVID-19.  
6  
7  
8  
9  
10  
11

12 **Ethics and Dissemination:** Applied for approval from institutional review board at the  
13 study sites. Results will be published in peer-reviewed journals.  
14  
15  
16  
17  
18  
19  
20  
21  
22  
23  
24  
25  
26  
27  
28  
29  
30  
31  
32  
33  
34  
35  
36  
37  
38  
39  
40  
41  
42  
43  
44  
45  
46  
47  
48  
49  
50  
51  
52  
53  
54  
55  
56  
57  
58  
59  
60

For peer review only

## STRENGTHS AND LIMITATIONS OF THIS STUDY

- Automatic physiological data collection by wearable biosensor that do not rely on self-discipline of quarantined subjects.
- Large number of physiological parameters monitored, including skin temperature, respiratory rate, blood pressure, pulse rate, blood oxygen saturation and daily activities, instead of relying solely on temperature measurement.
- Continuous data collection and analysis throughout the day.
- Limited by being single-center based and exploratory in nature.

## INTRODUCTION

Coronavirus Disease 2019 (COVID-19) emerged in December 2019,(1-4) and in mere few months has spread to more than 104 countries, resulting in an outbreak of viral pneumonia worldwide. As of March 12, 2020, the virus has reportedly caused 127,863 infections and 4,718 deaths globally.(5) The World Health Organization (WHO) declared COVID-19 a public health emergency of international concern on January 30, 2020 and further characterized it as pandemic on March 11, 2020. As there has yet been specific therapeutic or vaccine for the condition, rigorous implementation of traditional public health measures including isolation, quarantine, social distancing, and community containment is the principle strategy to control the COVID-19 epidemic.(6) In addition to isolation of confirmed COVID-19 infected patients from non-infected population, it is equally if not more important to quarantine asymptomatic individuals with possible exposure to COVID-19 in order to reduce the viral spread. Indeed, quarantine measures have been initiated in many countries and regions, which restrict movement of asymptomatic individuals with COVID-19 exposure often with fever and symptom surveillance at home or designated facilities for the presumed incubation period (14 days). While conceptually attractive, the intermittent nature and high dependency of self-discipline for body temperature and symptom surveillance undermine the practicality and effectiveness of the approach. Furthermore, it has been reported that as many as 50% of COVID-19 infected patients had no fever until developing full-blown disease,(3, 7) thereby body temperature surveillance *per se* may not be sufficient to detect early disease progression.

In the past few decades, advances in sensor technology miniaturize electronic physiological sensors that could be incorporated into wearable devices allowing

1  
2  
3 continuous monitoring of physiological parameters such as skin temperature, heart rate,  
4 respiratory rate, oxygen saturation, perspiration and activity of ambulatory subjects in  
5 a 24/7 basis.(8, 9) Together with current telecommunication platform capable of  
6 instantaneous and multi-directional massive data transfer, it is possible to remotely  
7 monitor a large number of individual subjects' physiological parameters in a real-time  
8 manner, and relay to managing physicians for timely intervention. Nonetheless, such  
9 potentials have not been fully explored in the real-world disease management. The  
10 current study will assess the impact of remote continuous monitoring in asymptomatic  
11 subjects with COVID-19 exposure under mandatory quarantine at designated facilities  
12 in Hong Kong using Biovitals® Sentinel Platform. The platform consists of continuous  
13 real-time physiological monitoring using a clinical-grade wearable biosensor worn on  
14 the upper arm called Everion® (Biofourmis, Singapore) and an artificial intelligence-  
15 powered physiology analytical platform Biovitals® (Biofourmis, Singapore) to detect  
16 progression of disease. The research hypothesis is that continuous physiological data  
17 collected using Biovitals® Sentinel and patient reported outcomes processed through a  
18 cloud-based analytics platform, Biovitals®, will allow detection of physiology changes  
19 (and other clinically meaningful alerts) that would indicate early clinical progression in  
20 quarantined subjects with COVID-19 exposure.  
21  
22  
23  
24  
25  
26  
27  
28  
29  
30  
31  
32  
33  
34  
35  
36  
37  
38  
39  
40  
41  
42  
43  
44  
45  
46

## 47 **METHODS AND ANALYSIS**

48  
49 This clinical trial protocol follows the Standard Protocol Items: Recommendations for  
50 Interventional Trials (SPIRIT).(10, 11) The underlying protocol follows the  
51 Consolidated Standards of Reporting Trials (CONSORT).(12, 13) Registration on  
52 clinicaltrials.gov has been submitted and pending approval.  
53  
54  
55  
56  
57  
58  
59  
60

## Study Design and Participants

This is a prospective, randomized controlled, open-labeled study. Asymptomatic subjects with COVID-19 exposure at designated facilities under the compulsory quarantine measure introduced on February 8, 2020 in Hong Kong, fulfilling inclusion and exclusion criteria of the study will be invited to participate in this study. Table 1 summarizes the inclusion and exclusion criteria.

There will be 2 phases of the subject recruitment. The initial run-in phase is a single arm, open-label study design confirmation phase with approximately 100 subjects. All subjects will undergo remote physiological monitoring using Biovitals® Sentinel platform. The data collected from the platform and clinical data from health system will be used to validate the solution and the study design for the randomized phase. In the subsequent randomized phase, subjects will be randomized in a 1:1 ratio to (1) Continuous remote physiological monitoring using Biovitals® Sentinel platform (Intervention group) or (2) Usual care (Control group) during the 14 day-quarantine period. (Figure 1)

In addition to daily body temperature monitoring and symptom surveillance in the Control group, subjects randomized to the Intervention group will wear a multi-sensor-based wearable armband biosensor, Everion®, during the quarantine period. Everion® is a wearable vital sign monitor capable to track heart rate, heart rate variability, blood oxygen saturation, blood pulse wave, respiration rate under rest, skin blood perfusion, activity, steps, skin temperature, barometric pressure and electrodermal activity. The wearable monitors will be worn for 22-23 hours per day and be recharged while bathing or showering. In addition, patients will be instructed to

1  
2  
3 report their symptoms and record their cough sounds using the specially-designed  
4 smartphone application daily. The physiological parameters obtained will be  
5 automatically transferred in real time through a specially-designed smartphone  
6 application to secured cloud storage for processing using Biovitals® Analytics Engine  
7 and display the results on a web-based clinicians dashboard for review. (Figure 2,  
8 Figure 3, Figure 4 and Figure 5) Biovitals® Analytics Engine processed these multiple  
9 physiology parameters and detects subtle physiology changes precursor to critical  
10 events thereby enabling clinicians to review and intervene. As an additional safety  
11 measure specific alert thresholds for individual physiological parameters have also been  
12 set. Study investigators will remotely review individual subjects' physiological  
13 parameters every 4 hours, and order diagnostic tests for COVID-19 infection through  
14 instant communication (electronic communication and/or phone). In addition, after  
15 initial run-in phase together with adequate number of confirmed COVID-19,  
16 physiological data will be used to enhance Biovitals® prediction model for COVID-19  
17 infection using machine learning technology.  
18  
19  
20  
21  
22  
23  
24  
25  
26  
27  
28  
29  
30  
31  
32  
33  
34  
35  
36  
37  
38  
39

## 40 **Outcomes**

41  
42 The primary outcome measure is the time to detection of COVID-19 infection using  
43 nasopharyngeal sampling for COVID-19 RT-PCR.  
44  
45  
46  
47  
48

49 The secondary outcomes include wearable device adherence, sensitivity, specificity,  
50 positive predictive value, negative predictive value and the area under the receiver  
51 operating characteristic (ROC) curve of Biovitals® Sentinel in identifying COVID-19  
52 subjects, viral load of COVID-19 using nasopharyngeal sampling for RT-PCR at  
53 diagnosis, cross-infection rate within family cluster, length of hospital stay, length of  
54  
55  
56  
57  
58  
59  
60

1  
2  
3 intensive care unit stay, non-invasive and invasive ventilation use, National Early  
4  
5 Warning Score 2, worsening of comorbidities and mortality.  
6  
7  
8  
9

### 10 **Sample size and statistical analysis**

11  
12 Sample size for the randomization phase will be determined based on the result from  
13  
14 the phase I run-in period involving approximately 100 subjects. Sample size of run-in  
15  
16 period was determined by convenience sampling due to the lack of previous study with  
17  
18 the research theme. To explore and estimate effect of longitudinally measured clinical  
19  
20 and physiological data on time-to-event of primary and secondary outcome, joint  
21  
22 modelling of longitudinal and time-to-event data analysis, and other statistical and/or  
23  
24 machine learning-based methods will be utilized. Data normality of continuous  
25  
26 variables will be assessed using skewness statistics. Baseline characteristics of the two  
27  
28 study groups will be compared using ANOVA, chi-square or Fisher's exact tests, as  
29  
30 appropriate. Analysis of the primary and secondary outcomes will conform to the  
31  
32 intention-to-treat principle. Cox regression analysis will be performed to compare  
33  
34 the time to diagnosis of COVID-19 infection between the study groups with  
35  
36 adjustment for potential confounders. For other secondary outcomes, the  
37  
38 generalized estimating equations model will be used to compare the differential changes  
39  
40 in each of the outcomes across the 14-day time points between the two study arms, with  
41  
42 adjustment for the potential confounders.  
43  
44  
45  
46  
47  
48  
49  
50

### 51 **Randomization**

52  
53 Patients will be randomized to Intervention group or Control group using a computer-  
54  
55 generated random number to derive allocation sequence prior to enrollment in the study.  
56  
57  
58 Study staff responsible for enrollment will be informed of randomization assignment  
59  
60



1  
2  
3 after entering information of subjects to a designated computer system. For any subject  
4  
5 found to be ineligible for the study after randomization, the original assignment will be  
6  
7 re-assigned to the next eligible subject. Subjects and clinicians will not be blinded to  
8  
9 the randomization assignment. Data staff responsible for data entry will be blinded from  
10  
11 randomization assignment.  
12  
13  
14  
15  
16

### 17 **Data collection and management**

18  
19 After enrollment, each subject will be assigned a unique identifier to be used in database.  
20  
21 Data will be entered by study staff and data accuracy will be verified by study principal  
22  
23 investigator. Data quality control measures include queries to identify missing data,  
24  
25 outliers and discrepancies. The database will be password protected and encrypted.  
26  
27 Only study staff will have access to the database. Subjects who withdraw from the study  
28  
29 will have continuous monitoring stopped, usual care continued and final outcome  
30  
31 collected for analysis.  
32  
33  
34  
35  
36  
37

### 38 **Data monitoring**

39  
40 Due to the minimal risk nature of the study, there is no external data and safety  
41  
42 monitoring board. The principal investigator and study staff will monitor data internally  
43  
44 and meet weekly in person or by phone to ensure the study is being proceeded as  
45  
46 intended.  
47  
48  
49  
50

### 51 **Patient and public involvement**

52  
53 We received input from quarantined individuals and healthcare providers which guided  
54  
55 the design of the current study and choice of research questions. No quarantined  
56  
57 individuals or the public were directly involved in the design of the study and choice of  
58  
59  
60

1  
2  
3 outcome measures. No quarantined individuals or the public will be involved in  
4 recruitment or conduct of the study. Results of the study will be disseminated to subjects,  
5  
6 the public and the scientific community.  
7  
8  
9

## 10 11 12 **ETHICS AND DISSEMINATION** 13

14 The investigation conforms with the principles outlined in the Declaration of Helsinki.

15  
16 The study protocol has been approved by the Institutional Review Board of The  
17 University of Hong Kong, and Hong Kong West Cluster, Hospital Authority, Hong  
18 Kong. The study protocol for run-in phase has been approved by the Institutional  
19 Review Board of the Department of Health, Hong Kong SAR Government, Hong Kong  
20 SAR, China. Approval for the study protocol for the randomization phase is still  
21 pending from the Institutional Review Board of the Department of Health, Hong Kong  
22 SAR Government, Hong Kong SAR, China. Written informed consents will be  
23 obtained from all study participants by study staff responsible for recruitment  
24 (Supplementary Files 1 and 2). Important protocol modifications will be  
25 conveyed to investigators, Institutional Review Board, trial registries, regulators,  
26 journals and trial participants. After enrollment, each subject will be assigned a unique  
27 identifier to be used in database. Personal identity of subjects will not be used for any  
28 public purpose, publication, or transmitted outside of the study team.  
29  
30  
31  
32  
33  
34  
35  
36  
37  
38  
39  
40  
41  
42  
43  
44  
45  
46  
47  
48

49 Dataset used during the study will be available from the corresponding author on  
50 reasonable request. Collaboration with other investigators interested in optimizing  
51 quarantine strategies for COVID-19 will be welcomed. The results of the trial will be  
52 published in peer-reviewed journals and presented in conferences.  
53  
54  
55  
56  
57  
58  
59  
60

## DISCUSSION

Emerging in December 2019, the COVID-19 has spread at a rate far outstripping the capacity of many medical systems.(14) Traditionally, public health measures including isolation and quarantine are the cornerstone to curb the spread of infectious diseases by interrupting person-to-person transmission, and are particularly important when no specific therapeutics or vaccines are available.(6) Indeed, early detection of infected individuals amongst those with viral exposure followed by isolation would effectively reduce overt viral shedding in the community; nonetheless, early detection can be challenging.

Symptom and fever surveillance amongst individuals with COVID-19 exposure is a commonly used method to detect infected individuals in the absence of medical testing. However, symptom declaration and intermittent body temperature measurement *per se* may not be sufficient to detect early disease progression. Indeed, up to 50% COVID-19 infected patients were so called “asymptomatic” and did not have fever until the full-blown disease. (7) Conceivably, while fever is one of cardinal symptoms specific for active infection, many other physiological alterations such as heart rate, respiratory rate, oxygen saturation, perspiration and so on may likewise indicate active infection. However, practically speaking, they are more difficult to accurately measure without medical training.

The intervention arm of current study differs from the existing symptom and fever surveillance-based quarantine program in several important aspects. The incorporation of a wide-range of physiological parameters instead of a single physiological parameter, intermittent body temperature, from skin temperature, heart rate, respiratory rate,

1  
2  
3 oxygen saturation, motion activity, and so on collected on a 24/7 basis will provide a  
4  
5 more accurate assessment of the individuals' physiological changes and increase the  
6  
7 chance for early detection of clinical progression. (9) At the same time, the use of  
8  
9 contemporary mobile communication technology facilitates automatic collection and  
10  
11 transfer of physiological data. This can enhance patient compliance with the monitoring  
12  
13 system as well as greatly shorten the time between detection of an abnormality and  
14  
15 consequent intervention. In the past decades, wearable technology has been  
16  
17 increasingly used for medical diagnosis notably arrhythmia detection.(15-21) Indeed,  
18  
19 the wide array of physiological parameters and the massive continuous dynamic  
20  
21 physiological data particularly when analyzed in an integrative approach using artificial  
22  
23 intelligence technology, can in principle provide a much in-depth understanding of  
24  
25 disease process, thereby enhancing management. Nonetheless, such potentials have not  
26  
27 been fully explored in the real-world disease management. In short term, the results of  
28  
29 the current study may provide insights of the disease progression of COVID-19  
30  
31 infection and possible ways to reduce the disease spread. In long term, the study may  
32  
33 demonstrate an important example of how new technologies can be incorporated into  
34  
35 existing medical service.  
36  
37  
38  
39  
40  
41  
42  
43  
44  
45  
46  
47  
48  
49  
50  
51  
52  
53  
54  
55  
56  
57  
58  
59  
60

**Author Contributions:**

CWS, IFNH, CKW, RCFT and KSR contributed to the conception and design of the study. DTYH, ART, MZ and MOYT contributed to the acquisition of data. Data analysis and interpretation will be conducted by CWS, IFNH, CKW, RCFT, KSR, GC, SCC and YML. CWS, IFNH and CKW wrote first draft of the protocol. ART, MZ and YML revised the protocol critically for important intellectual content. All authors have read and approved the final version of the manuscript to be published.

**Funding statement:**

None.

**Acknowledgement:**

The Everion® wearable devices are donated by Biofourmis Singapore, and Harmony Ltd. The mobile phone and cellular data are supported by PCCW Ltd.

**Declaration of interest:**

RCFT is employed by Harmony Medical Inc., which donated Everion® wearable devices. GC and SSC are employed by Biofourmis, which donated Everion® wearable devices.

**Legends:**

Figure 1: Study flow.

Figure 2: Wearable device and Home screen of the dedicated smartphone app.

Figure 3: Smartphone application screen for symptom surveillance.

Figure 4: Smartphone application screen for cough sound recording.

Figure 5: Web-based dashboard for clinicians.

**Supplementary Files:**

Supplementary File 1: Consent form of the run-in phase in English

Supplementary File 2: Consent form of the randomization phase in English

**Table 1. Inclusion and exclusion criteria**

|                                                                                                                                                                                                                                                                                                                                                                                                                                                    |
|----------------------------------------------------------------------------------------------------------------------------------------------------------------------------------------------------------------------------------------------------------------------------------------------------------------------------------------------------------------------------------------------------------------------------------------------------|
| <p><b><i>Inclusion criteria</i></b></p> <ul style="list-style-type: none"><li>• Age <math>\geq</math> 18 years</li><li>• Asymptomatic for COVID-19 pneumonia</li><li>• With close COVID-19 contact under mandatory quarantine at designated facilities in Hong Kong</li><li>• Voluntarily agrees to participate by providing written informed consent</li></ul>                                                                                    |
| <p><b><i>Exclusion criteria</i></b></p> <ul style="list-style-type: none"><li>• Symptoms suggestive of COVID-19 infection including fever, upper respiratory symptoms, and/or gastrointestinal symptoms at recruitment.</li><li>• Confirmed COVID-19 infection</li><li>• Planned laboratory test for COVID-19</li><li>• Inability or refusal to provide informed consent</li><li>• Lack of skills in operating simple electronic devices</li></ul> |

## REFERENCES

1. Li Q, Guan X, Wu P, Wang X, Zhou L, Tong Y, et al. Early Transmission Dynamics in Wuhan, China, of Novel Coronavirus-Infected Pneumonia. *N Engl J Med*. 2020.
2. Wu JT, Leung K, Leung GM. Nowcasting and forecasting the potential domestic and international spread of the 2019-nCoV outbreak originating in Wuhan, China: a modelling study. *Lancet*. 2020;395(10225):689-97.
3. Guan WJ, Ni ZY, Hu Y, Liang WH, Ou CQ, He JX, et al. Clinical Characteristics of Coronavirus Disease 2019 in China. *N Engl J Med*. 2020.
4. Chan JF, Yuan S, Kok KH, To KK, Chu H, Yang J, et al. A familial cluster of pneumonia associated with the 2019 novel coronavirus indicating person-to-person transmission: a study of a family cluster. *Lancet*. 2020;395(10223):514-23.
5. Dong E, Du H, Gardner L. An interactive web-based dashboard to track COVID-19 in real time. *Lancet Infect Dis*. 2020.
6. Hellewell J, Abbott S, Gimma A, Bosse NI, Jarvis CI, Russell TW, et al. Feasibility of controlling COVID-19 outbreaks by isolation of cases and contacts. *Lancet Glob Health*. 2020.
7. Kenji Mizumoto KK, Alexander Zarebski, Gerardo Chowell. Estimating the Asymptomatic Proportion of 2019 Novel Coronavirus onboard the Princess Cruises Ship, 2020. *medRxiv*. 2020.
8. van Vliet M, Donnelly JP, Potting CM, Blijlevens NM. Continuous non-invasive monitoring of the skin temperature of HSCT recipients. *Support Care Cancer*. 2010;18(1):37-42.
9. Pevnick JM, Birkeland K, Zimmer R, Elad Y, Kedan I. Wearable technology for cardiology: An update and framework for the future. *Trends Cardiovasc Med*. 2018;28(2):144-50.
10. Chan AW, Tetzlaff JM, Altman DG, Laupacis A, Gotzsche PC, Krleza-Jeric K, et al. SPIRIT 2013 statement: defining standard protocol items for clinical trials. *Ann Intern Med*. 2013;158(3):200-7.
11. Chan AW, Tetzlaff JM, Gotzsche PC, Altman DG, Mann H, Berlin JA, et al. SPIRIT 2013 explanation and elaboration: guidance for protocols of clinical trials. *BMJ*. 2013;346:e7586.
12. Altman DG, Schulz KF, Moher D, Egger M, Davidoff F, Elbourne D, et al. The revised CONSORT statement for reporting randomized trials: explanation and elaboration. *Ann Intern Med*. 2001;134(8):663-94.
13. Moher D, Schulz KF, Altman DG, Consort. The CONSORT statement: revised recommendations for improving the quality of reports of parallel group randomized trials. *BMC Med Res Methodol*. 2001;1:2.
14. Camps JA, Zuur C, Blokland JA, Broerse JJ, Pauwels EK. A breathing lung phantom for 81mKr lung ventilation studies its use in dosimetry and quality control. *Eur J Nucl Med*. 1988;14(11):529-32.
15. Guo Y, Wang H, Zhang H, Liu T, Liang Z, Xia Y, et al. Mobile Photoplethysmographic Technology to Detect Atrial Fibrillation. *J Am Coll Cardiol*. 2019;74(19):2365-75.
16. Perez MV, Mahaffey KW, Hedlin H, Rumsfeld JS, Garcia A, Ferris T, et al. Large-Scale Assessment of a Smartwatch to Identify Atrial Fibrillation. *N Engl J Med*. 2019;381(20):1909-17.
17. Poh MZ, Loddenkemper T, Swenson NC, Goyal S, Madsen JR, Picard RW. Continuous monitoring of electrodermal activity during epileptic seizures using a wearable sensor. *Conf Proc IEEE Eng Med Biol Soc*. 2010;2010:4415-8.
18. Poh MZ, Loddenkemper T, Reinsberger C, Swenson NC, Goyal S, Sabtala MC, et al. Convulsive seizure detection using a wrist-worn electrodermal activity and accelerometry biosensor. *Epilepsia*. 2012;53(5):e93-7.



1  
2  
3 19. Chan PH, Wong CK, Pun L, Wong YF, Wong MM, Chu DW, et al. Diagnostic  
4 performance of an automatic blood pressure measurement device, Microlife WatchBP Home  
5 A, for atrial fibrillation screening in a real-world primary care setting. *BMJ Open*.  
6 2017;7(6):e013685.  
7  
8 20. Chan PH, Wong CK, Pun L, Wong YF, Wong MM, Chu DW, et al. Head-to-Head  
9 Comparison of the AliveCor Heart Monitor and Microlife WatchBP Office AFIB for Atrial  
10 Fibrillation Screening in a Primary Care Setting. *Circulation*. 2017;135(1):110-2.  
11 21. Chan PH, Wong CK, Poh YC, Pun L, Leung WW, Wong YF, et al. Diagnostic  
12 Performance of a Smartphone-Based Photoplethysmographic Application for Atrial  
13 Fibrillation Screening in a Primary Care Setting. *J Am Heart Assoc*. 2016;5(7).  
14  
15  
16  
17  
18  
19  
20  
21  
22  
23  
24  
25  
26  
27  
28  
29  
30  
31  
32  
33  
34  
35  
36  
37  
38  
39  
40  
41  
42  
43  
44  
45  
46  
47  
48  
49  
50  
51  
52  
53  
54  
55  
56  
57  
58  
59  
60

For peer review only

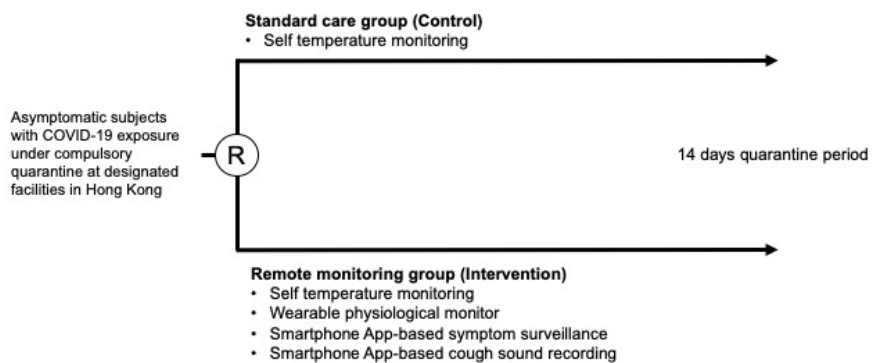

Primary endpoint: the time to detection of COVID-19 infection using nasopharyngeal sampling for COVID-19 RT-PCR

**Figure 1**

Figure 1: Study flow.

254x190mm (72 x 72 DPI)

1  
2  
3  
4  
5  
6  
7  
8  
9  
10  
11  
12  
13  
14  
15  
16  
17  
18  
19  
20  
21  
22  
23  
24  
25  
26  
27  
28  
29  
30  
31  
32  
33  
34  
35  
36  
37  
38  
39  
40  
41  
42  
43  
44  
45  
46  
47  
48  
49  
50  
51  
52  
53  
54  
55  
56  
57  
58  
59  
60

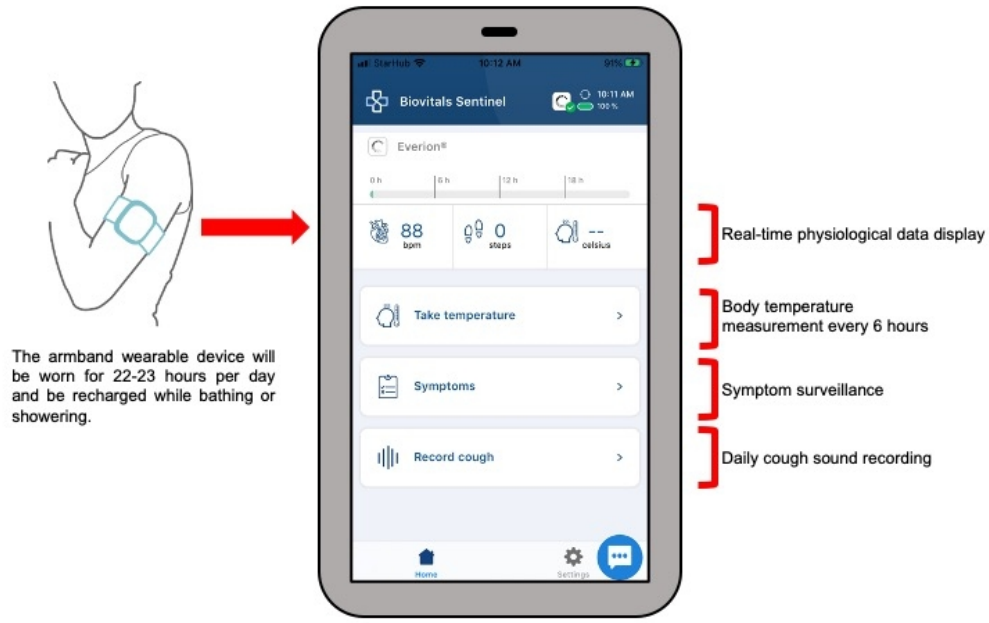

**Figure 2**

Figure 2: Wearable device and Home screen of the dedicated smartphone app.

254x190mm (72 x 72 DPI)

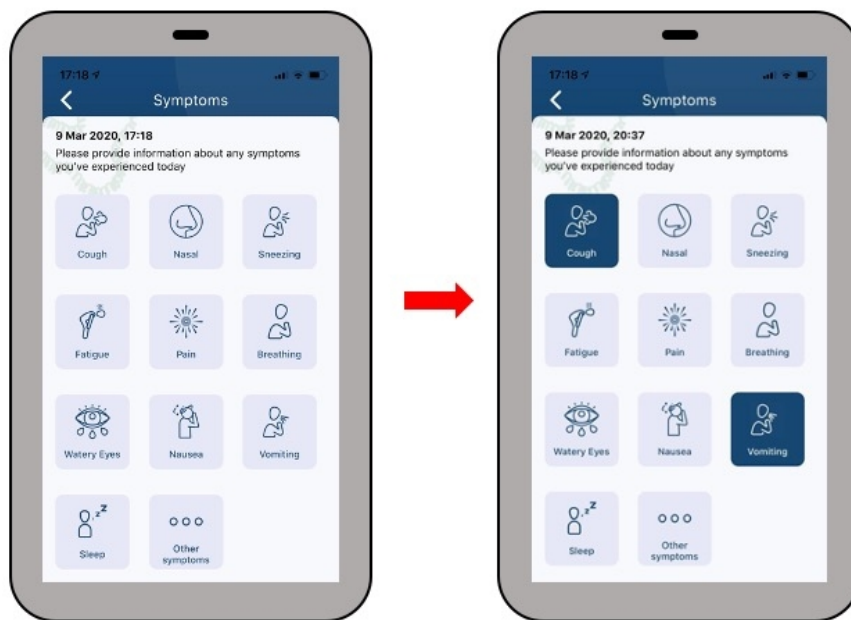

**Figure 3**

Figure 3: Smartphone application screen for symptom surveillance.

254x190mm (72 x 72 DPI)

1  
2  
3  
4  
5  
6  
7  
8  
9  
10  
11  
12  
13  
14  
15  
16  
17  
18  
19  
20  
21  
22  
23  
24  
25  
26  
27  
28  
29  
30  
31  
32  
33  
34  
35  
36  
37  
38  
39  
40  
41  
42  
43  
44  
45  
46  
47  
48  
49  
50  
51  
52  
53  
54  
55  
56  
57  
58  
59  
60

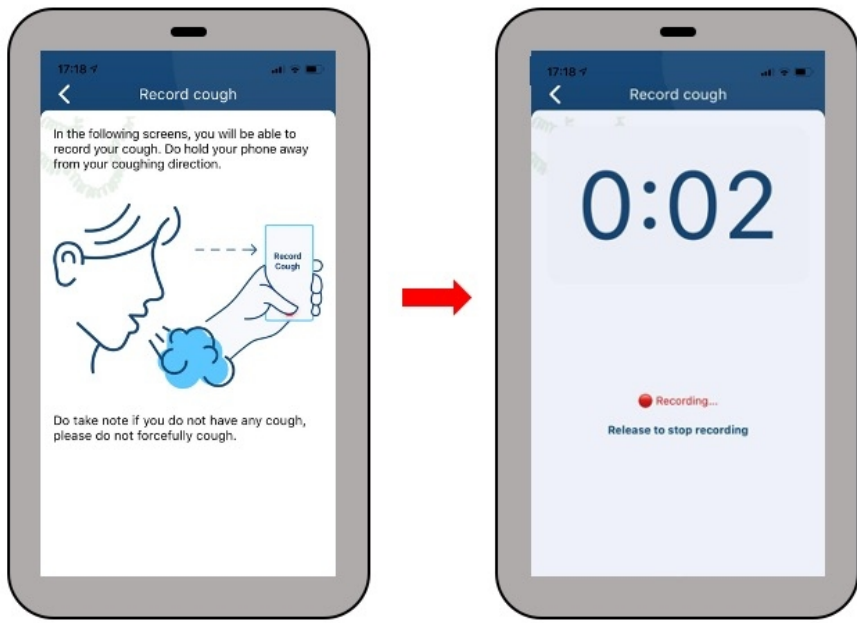

**Figure 4**

Figure 4: Smartphone application screen for cough sound recording.  
254x190mm (72 x 72 DPI)

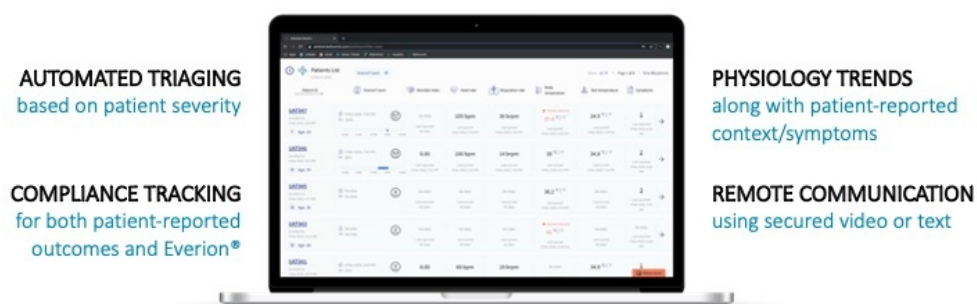**Figure 5**

Figure 5: Web-based dashboard for clinicians.

254x190mm (72 x 72 DPI)

## CONSENT FORM (Run-in Phase)

Study Name: Using Biovitals® in Early Detection of Progression of Disease  
in Patients Suspected with COVID-19

Version No.: COVID19\_Biovitals\_Consent\_2\_run\_in\_en (17/03/2020)

Protocol No.: COVID19\_Biovitals\_Protocol\_1

Study Site: Hospitals of the Hospital Authority, and  
Quarantine Sites of Hong Kong SAR Government

Study Doctors: Prof HUNG Fan Ngai Ivan and Prof. SIU Chung Wah David

---

You are being invited to take part in a research study. Before you decide, it is important to understand why the research is being done and what it will involve. Please take time to read the following information carefully. Ask the study doctor or research staff any questions you may have before signing the attached consent form.

### About This Study

The purpose of our study is to explore the potential of state-of-the-art wearable technology for remote monitoring of patients with suspected COVID-19 infection in order to achieve early diagnosis of the infection and prompt identification of complication to allow timely management.

### Why have I been chosen?

You are considered high risk from having COVID-19, a condition associated with significant morbidity and mortality. Early diagnosis of the infection and prompt identification of complication would allow delivery of timely management, therefore you are invited into our study to undergo remote monitoring with wearable technology. We plan to recruit a total of 100 patients.

### What will happen to me if I take part?

You will receive a Biovotion® armband with multiple sensors for telemonitoring of your health status.

### What are the benefits of participating?

Taking part in this study may or may not make your health better. Information from this study will help doctors learn more about the value of using remote monitoring with

wearable technology. This information will help patients in the future.

### **What if something goes wrong?**

In the unlikely event of harm resulting directly from your participation in this study, medical treatment will be available. There are no special compensation arrangements provided to you. If you are harmed due to someone's negligence, then you may have grounds for a legal action but you may have to pay for it. Regardless of this, if you wish to complain about any aspect of the way you have been approached or treated during the course of this study, the normal health service complaints mechanisms may be available to you. If you have any queries related to the insurance coverage from your own insurer(s) for your participation in the study, please discuss with your insurance consultant.

### **What are the alternatives for treatment?**

Your participation in this study is voluntary. You may choose not to participate in this study. You may decline to participate by simply telling your doctor. If you decide not to participate in this study, your follow-up appointments will be scheduled and conducted as directed by your physician. Your decision will not in any way affect your medical care or treatment.

### **What if new information becomes available?**

During the course of the study, if any new information becomes available that may relate to your willingness to continue to participate in this study, your research doctor will tell you about it and discuss with you. You also have the rights of access to personal data and known study results, if and when needed.

### **Will my participation in this study be kept confidential?**

As a subject in this research study, all your information will be kept confidential. Your name or your personal identity will not be used for any public purpose, publication, or transmitted outside of the medical centre.

Under the laws of the Hong Kong Special Administrative Region and, in particular, the Personal Data (Privacy) Ordinance, Cap 486, you enjoy or may enjoy rights for the protection of the confidentiality of your personal data, such as those regarding the collection, custody, retention, management, control, use (including analysis or comparison), transfer in or out of Hong Kong, non-disclosure, erasure and/or in any way dealing with or disposing of any of your personal data in or for this study. By



1  
2  
3  
4 consenting to participate in this study, you expressly authorize the access to, the use of,  
5 and the retention of your personal data by the Investigator and members of his research  
6 team, and HKU/HA HKW IRB for the purposes and in the manner described in this  
7 informed consent process.  
8  
9

10  
11 For any query, you should consult the Privacy Commissioner for Privacy Data or his  
12 office (Tel No. 2827 2827) as to the proper monitoring or supervision of your personal  
13 data protection so that your full awareness and understanding of the significance of  
14 compliance with the law governing privacy data is assured.  
15  
16

17  
18 **Who should I contact if have questions?**  
19

20 If you have any questions regarding this study, you may contact Prof. SIU Chung Wah  
21 David or Prof FUNG Fan Ngai Ivan at XXXXXXXXX. If you have any queries regarding  
22 your rights in the study, you may contact the Secretary of Institutional Review Board  
23 of the University of Hong Kong / Hospital Authority Hong Kong West Cluster at 2255  
24 4086.  
25  
26  
27  
28  
29  
30  
31  
32  
33  
34  
35  
36  
37  
38  
39  
40  
41  
42  
43  
44  
45  
46  
47  
48  
49  
50  
51  
52  
53  
54  
55  
56  
57  
58  
59  
60

By signing below, I agree that:

1. I confirm that I have read and understood the information sheet for the above study and have had the opportunity to ask questions.
2. I understand that my participation is voluntary and that I am free to withdraw at any time, without giving any reason, without my medical care or legal rights being affected.
3. I understand that sections of any of my medical notes may be looked at by responsible individuals or from regulatory authorities where it is relevant to my taking part in research. I give permission for these individuals to have access to my records.
4. I agree to take part in the above study.

Title of the Project: Using Biovitals® in Early Detection of Progression of Disease  
in Patients Suspected with COVID-19

Patient Identification Number for this trial: \_\_\_\_\_

Participant's Signature: \_\_\_\_\_

Participant's Name: \_\_\_\_\_

Date: \_\_\_\_\_

Investigator's Signature: \_\_\_\_\_

Investigator's Name: \_\_\_\_\_

Date: \_\_\_\_\_

Witness's Signature: \_\_\_\_\_

Witness's Name: \_\_\_\_\_

Date: \_\_\_\_\_

## CONSENT FORM (Randomization Phase)

Study Name: Using Biovitals® in Early Detection of Progression of Disease  
in Patients Suspected with COVID-19

Version No.: COVID19\_Biovitals\_Consent\_2\_randomization\_en (17/03/2020)

Protocol No: COVID19\_Biovitals\_Protocol\_1

Study Site: Hospitals of the Hospital Authority, and  
Quarantine Sites of Hong Kong SAR Government

Study Doctors: Prof HUNG Fan Ngai Ivan and Prof. SIU Chung Wah David

---

You are being invited to take part in a research study. Before you decide, it is important to understand why the research is being done and what it will involve. Please take time to read the following information carefully. Ask the study doctor or research staff any questions you may have before signing the attached consent form.

### About This Study

The purpose of our study is to explore the potential of state-of-the-art wearable technology for remote monitoring of patients with suspected COVID-19 infection in order to achieve early diagnosis of the infection and prompt identification of complication to allow timely management.

### Why have I been chosen?

You are considered high risk from having COVID-19, a condition associated with significant morbidity and mortality. Early diagnosis of the infection and prompt identification of complication would allow delivery of timely management, therefore you are invited into our study to undergo remote monitoring with wearable technology. We plan to recruit a total of 200 patients.

### What will happen to me if I take part?

You will be randomized to receive standard of care or addition of Biovotion® armband with multiple sensors for telemonitoring of your health status. If clinicians detected abnormality from your measured parameters, further medical investigation or intervention might be arranged.

### **What are the benefits of participating?**

Taking part in this study may or may not make your health better. Information from this study will help doctors learn more about the value of using remote monitoring with wearable technology. This information will help patients in the future.

### **What if something goes wrong?**

In the unlikely event of harm resulting directly from your participation in this study, medical treatment will be available. There are no special compensation arrangements provided to you. If you are harmed due to someone's negligence, then you may have grounds for a legal action but you may have to pay for it. Regardless of this, if you wish to complain about any aspect of the way you have been approached or treated during the course of this study, the normal health service complaints mechanisms may be available to you. If you have any queries related to the insurance coverage from your own insurer(s) for your participation in the study, please discuss with your insurance consultant.

### **What are the alternatives for treatment?**

Your participation in this study is voluntary. You may choose not to participate in this study. You may decline to participate by simply telling your doctor. If you decide not to participate in this study, your follow-up appointments will be scheduled and conducted as directed by your physician. Your decision will not in any way affect your medical care or treatment.

### **What if new information becomes available?**

During the course of the study, if any new information becomes available that may relate to your willingness to continue to participate in this study, your research doctor will tell you about it and discuss with you. You also have the rights of access to personal data and known study results, if and when needed.

### **Will my participation in this study be kept confidential?**

As a subject in this research study, all your information will be kept confidential. Your name or your personal identity will not be used for any public purpose, publication, or transmitted outside of the medical centre.

Under the laws of the Hong Kong Special Administrative Region and, in particular, the Personal Data (Privacy) Ordinance, Cap 486, you enjoy or may enjoy rights for the protection of the confidentiality of your personal data, such as those regarding the

1  
2  
3  
4 collection, custody, retention, management, control, use (including analysis or  
5 comparison), transfer in or out of Hong Kong, non-disclosure, erasure and/or in any  
6 way dealing with or disposing of any of your personal data in or for this study. By  
7 consenting to participate in this study, you expressly authorize the access to, the use of,  
8 and the retention of your personal data by the Investigator and members of his research  
9 team, and HKU/HA HKW IRB for the purposes and in the manner described in this  
10 informed consent process.  
11  
12  
13  
14

15 For any query, you should consult the Privacy Commissioner for Privacy Data or his  
16 office (Tel No. 2827 2827) as to the proper monitoring or supervision of your personal  
17 data protection so that your full awareness and understanding of the significance of  
18 compliance with the law governing privacy data is assured.  
19  
20  
21  
22

### 23 **Who should I contact if have questions?**

24 If you have any questions regarding this study, you may contact Prof. SIU Chung Wah  
25 David or Prof FUNG Fan Ngai Ivan at XXXXXXXXX. If you have any queries regarding  
26 your rights in the study, you may contact the Secretary of Institutional Review Board  
27 of the University of Hong Kong / Hospital Authority Hong Kong West Cluster at 2255  
28 4086.  
29  
30  
31  
32  
33  
34  
35  
36  
37  
38  
39  
40  
41  
42  
43  
44  
45  
46  
47  
48  
49  
50  
51  
52  
53  
54  
55  
56  
57  
58  
59  
60

By signing below, I agree that:

1. I confirm that I have read and understood the information sheet for the above study and have had the opportunity to ask questions.
2. I understand that my participation is voluntary and that I am free to withdraw at any time, without giving any reason, without my medical care or legal rights being affected.
3. I understand that sections of any of my medical notes may be looked at by responsible individuals or from regulatory authorities where it is relevant to my taking part in research. I give permission for these individuals to have access to my records.
4. I agree to take part in the above study.

Title of the Project: Using Biovitals® in Early Detection of Progression of Disease  
in Patients Suspected with COVID-19

Patient Identification Number for this trial: \_\_\_\_\_

Participant's Signature: \_\_\_\_\_

Participant's Name: \_\_\_\_\_

Date: \_\_\_\_\_

Investigator's Signature: \_\_\_\_\_

Investigator's Name: \_\_\_\_\_

Date: \_\_\_\_\_

Witness's Signature: \_\_\_\_\_

Witness's Name: \_\_\_\_\_

Date: \_\_\_\_\_

## SPIRIT 2013 Checklist: Recommended items to address in a clinical trial protocol and related documents

| Section/item                      | ItemNo | Description                                                                                                  | Page                        |
|-----------------------------------|--------|--------------------------------------------------------------------------------------------------------------|-----------------------------|
| <b>Administrative information</b> |        |                                                                                                              |                             |
| Title                             | 1      | Descriptive title identifying the study design, population, interventions, and, if applicable, trial acronym | 1                           |
| Trial registration                | 2a     | Trial identifier and registry name. If not yet registered, name of intended registry                         | 7                           |
|                                   | 2b     | All items from the World Health Organization Trial Registration Data Set                                     | Uploaded to BMJ Open server |
| Protocol version                  | 3      | Date and version identifier                                                                                  | 1                           |
| Funding                           | 4      | Sources and types of financial, material, and other support                                                  | 15                          |
| Roles and responsibilities        | 5a     | Names, affiliations, and roles of protocol contributors                                                      | 1, 15                       |
|                                   | 5b     | Name and contact information for the trial sponsor                                                           | 15                          |

|  |    |                                                                                                                                                                                                                                                                                          |            |
|--|----|------------------------------------------------------------------------------------------------------------------------------------------------------------------------------------------------------------------------------------------------------------------------------------------|------------|
|  | 5c | Role of study sponsor and funders, if any, in study design; collection, management, analysis, and interpretation of data; writing of the report; and the decision to submit the report for publication, including whether they will have ultimate authority over any of these activities | 15         |
|  | 5d | Composition, roles, and responsibilities of the coordinating centre, steering committee, endpoint adjudication committee, data management team, and other individuals or groups overseeing the trial, if applicable (see Item 21a for data monitoring committee)                         | 10, 11, 15 |



1  
2  
3  
4  
5  
6  
7  
8  
9  
10  
11  
12  
13  
14  
15  
16  
17  
18  
19  
20  
21  
22  
23  
24  
25  
26  
27  
28  
29  
30  
31  
32  
33  
34  
35  
36  
37  
38  
39  
40  
41  
42  
43  
44  
45  
46

|                          |    |                                                                                                                                                                                                           |     |
|--------------------------|----|-----------------------------------------------------------------------------------------------------------------------------------------------------------------------------------------------------------|-----|
| <b>Introduction</b>      |    |                                                                                                                                                                                                           |     |
| Background and rationale | 6a | Description of research question and justification for undertaking the trial, including summary of relevant studies (published and unpublished) examining benefits and harms for each intervention        | 5-6 |
|                          | 6b | Explanation for choice of comparators                                                                                                                                                                     | 5-6 |
| Objectives               | 7  | Specific objectives or hypotheses                                                                                                                                                                         | 6   |
| Trial design             | 8  | Description of trial design including type of trial (eg, parallel group, crossover, factorial, single group), allocation ratio, and framework (eg, superiority, equivalence, noninferiority, exploratory) | 7   |

| <b>Methods: Participants, interventions, and outcomes</b> |     |                                                                                                                                                                                                |            |
|-----------------------------------------------------------|-----|------------------------------------------------------------------------------------------------------------------------------------------------------------------------------------------------|------------|
| Study setting                                             | 9   | Description of study settings (eg, community clinic, academic hospital) and list of countries where data will be collected. Reference to where list of study sites can be obtained             | 7          |
| Eligibility criteria                                      | 10  | Inclusion and exclusion criteria for participants. If applicable, eligibility criteria for study centres and individuals who will perform the interventions (eg, surgeons, psychotherapists)   | 7, Table 1 |
| Interventions                                             | 11a | Interventions for each group with sufficient detail to allow replication, including how and when they will be administered                                                                     | 7-9        |
|                                                           | 11b | Criteria for discontinuing or modifying allocated interventions for a given trial participant (eg, drug dose change in response to harms, participant request, or improving/worsening disease) | N/A        |
|                                                           | 11c | Strategies to improve adherence to intervention protocols, and any procedures for monitoring adherence (eg, drug tablet return, laboratory tests)                                              | 7-9        |
|                                                           | 11d | Relevant concomitant care and interventions that are permitted or prohibited during the trial                                                                                                  | 7-9        |

|                      |    |                                                                                                                                                                                                                                                                                                                                                                                |             |
|----------------------|----|--------------------------------------------------------------------------------------------------------------------------------------------------------------------------------------------------------------------------------------------------------------------------------------------------------------------------------------------------------------------------------|-------------|
| Outcomes             | 12 | Primary, secondary, and other outcomes, including the specific measurement variable (eg, systolic blood pressure), analysis metric (eg, change from baseline, final value, time to event), method of aggregation (eg, median, proportion), and time point for each outcome. Explanation of the clinical relevance of chosen efficacy and harm outcomes is strongly recommended | 9           |
| Participant timeline | 13 | Time schedule of enrolment, interventions (including any run-ins and washouts), assessments, and visits for participants. A schematic diagram is highly recommended (see Figure)                                                                                                                                                                                               | 7, Figure 1 |
| Sample size          | 14 | Estimated number of participants needed to achieve study objectives and how it was determined, including clinical and statistical assumptions supporting any sample size calculations                                                                                                                                                                                          | 9           |
| Recruitment          | 15 | Strategies for achieving adequate participant enrolment to reach target sample size                                                                                                                                                                                                                                                                                            | 7           |

1  
2  
3  
4  
5  
6  
7  
8  
9  
10  
11  
12  
13  
14  
15  
16  
17  
18  
19  
20  
21  
22  
23  
24  
25  
26  
27  
28  
29  
30  
31  
32  
33  
34  
35  
36  
37  
38  
39  
40  
41  
42  
43  
44  
45  
46

|                                                                     |     |                                                                                                                                                                                                                                                                                                                                                          |    |
|---------------------------------------------------------------------|-----|----------------------------------------------------------------------------------------------------------------------------------------------------------------------------------------------------------------------------------------------------------------------------------------------------------------------------------------------------------|----|
| <b>Methods: Assignment of interventions (for controlled trials)</b> |     |                                                                                                                                                                                                                                                                                                                                                          |    |
| Allocation:                                                         |     |                                                                                                                                                                                                                                                                                                                                                          |    |
| Sequence generation                                                 | 16a | Method of generating the allocation sequence (eg, computer-generated random numbers), and list of any factors for stratification. To reduce predictability of a random sequence, details of any planned restriction (eg, blocking) should be provided in a separate document that is unavailable to those who enrol participants or assign interventions | 10 |
| Allocation concealment mechanism                                    | 16b | Mechanism of implementing the allocation sequence (eg, central telephone; sequentially numbered, opaque, sealed envelopes), describing any steps to conceal the sequence until interventions are assigned                                                                                                                                                | 10 |
| Implementation                                                      | 16c | Who will generate the allocation sequence, who will enrol participants, and who will assign participants to interventions                                                                                                                                                                                                                                | 10 |
| Blinding (masking)                                                  | 17a | Who will be blinded after assignment to interventions (eg, trial participants, care providers, outcome assessors, data analysts), and how                                                                                                                                                                                                                | 10 |

1  
2  
3  
4  
5  
6  
7  
8  
9  
10  
11  
12  
13  
14  
15  
16  
17  
18  
19  
20  
21  
22  
23  
24  
25  
26  
27  
28  
29  
30  
31  
32  
33  
34  
35  
36  
37  
38  
39  
40  
41  
42  
43  
44  
45  
46

|  |     |                                                                                                                                                      |     |
|--|-----|------------------------------------------------------------------------------------------------------------------------------------------------------|-----|
|  | 17b | If blinded, circumstances under which unblinding is permissible, and procedure for revealing a participant's allocated intervention during the trial | N/A |
|--|-----|------------------------------------------------------------------------------------------------------------------------------------------------------|-----|

For peer review only

| <b>Methods: Data collection, management, and analysis</b> |     |                                                                                                                                                                                                                                                                                                                                                                                                              |       |
|-----------------------------------------------------------|-----|--------------------------------------------------------------------------------------------------------------------------------------------------------------------------------------------------------------------------------------------------------------------------------------------------------------------------------------------------------------------------------------------------------------|-------|
| Data collection methods                                   | 18a | Plans for assessment and collection of outcome, baseline, and other trial data, including any related processes to promote data quality (eg, duplicate measurements, training of assessors) and a description of study instruments (eg, questionnaires, laboratory tests) along with their reliability and validity, if known. Reference to where data collection forms can be found, if not in the protocol | 10-11 |
|                                                           | 18b | Plans to promote participant retention and complete follow-up, including list of any outcome data to be collected for participants who discontinue or deviate from intervention protocols                                                                                                                                                                                                                    | 10    |
| Data management                                           | 19  | Plans for data entry, coding, security, and storage, including any related processes to promote data quality (eg, double data entry; range checks for data values). Reference to where details of data management procedures can be found, if not in the protocol                                                                                                                                            | 10    |
| Statistical methods                                       | 20a | Statistical methods for analysing primary and secondary outcomes. Reference to where other details of the statistical analysis plan can be found, if not in the protocol                                                                                                                                                                                                                                     | 9     |

|  |     |                                                                                                                                                                                 |   |
|--|-----|---------------------------------------------------------------------------------------------------------------------------------------------------------------------------------|---|
|  | 20b | Methods for any additional analyses (eg, subgroup and adjusted analyses)                                                                                                        | 9 |
|  | 20c | Definition of analysis population relating to protocol non-adherence (eg, as randomised analysis), and any statistical methods to handle missing data (eg, multiple imputation) | 9 |

For peer review only

1  
2  
3  
4  
5  
6  
7  
8  
9  
10  
11  
12  
13  
14  
15  
16  
17  
18  
19  
20  
21  
22  
23  
24  
25  
26  
27  
28  
29  
30  
31  
32  
33  
34  
35  
36  
37  
38  
39  
40  
41  
42  
43  
44  
45  
46

| <b>Methods: Monitoring</b> |     |                                                                                                                                                                                                                                                                                                                                       |    |
|----------------------------|-----|---------------------------------------------------------------------------------------------------------------------------------------------------------------------------------------------------------------------------------------------------------------------------------------------------------------------------------------|----|
| Data monitoring            | 21a | Composition of data monitoring committee (DMC); summary of its role and reporting structure; statement of whether it is independent from the sponsor and competing interests; and reference to where further details about its charter can be found, if not in the protocol. Alternatively, an explanation of why a DMC is not needed | 11 |
|                            | 21b | Description of any interim analyses and stopping guidelines, including who will have access to these interim results and make the final decision to terminate the trial                                                                                                                                                               | 11 |
| Harms                      | 22  | Plans for collecting, assessing, reporting, and managing solicited and spontaneously reported adverse events and other unintended effects of trial interventions or trial conduct                                                                                                                                                     | 11 |
| Auditing                   | 23  | Frequency and procedures for auditing trial conduct, if any, and whether the process will be independent from investigators and the sponsor                                                                                                                                                                                           | 11 |



| <b>Ethics and dissemination</b> |     |                                                                                                                                                                                                                                  |    |
|---------------------------------|-----|----------------------------------------------------------------------------------------------------------------------------------------------------------------------------------------------------------------------------------|----|
| Research ethics approval        | 24  | Plans for seeking research ethics committee/institutional review board (REC/IRB) approval                                                                                                                                        | 11 |
| Protocol amendments             | 25  | Plans for communicating important protocol modifications (eg, changes to eligibility criteria, outcomes, analyses) to relevant parties (eg, investigators, REC/IRBs, trial participants, trial registries, journals, regulators) | 11 |
| Consent or assent               | 26a | Who will obtain informed consent or assent from potential trial participants or authorised surrogates, and how (see Item 32)                                                                                                     | 11 |
|                                 | 26b | Additional consent provisions for collection and use of participant data and biological specimens in ancillary studies, if applicable                                                                                            | 11 |
| Confidentiality                 | 27  | How personal information about potential and enrolled participants will be collected, shared, and maintained in order to protect confidentiality before, during, and after the trial                                             | 12 |
| Declaration of interests        | 28  | Financial and other competing interests for principal investigators for the overall trial and each study site                                                                                                                    | 15 |

|                                                          |                               |     |                                                                                                                                                                                                                                                                                     |       |
|----------------------------------------------------------|-------------------------------|-----|-------------------------------------------------------------------------------------------------------------------------------------------------------------------------------------------------------------------------------------------------------------------------------------|-------|
| 1<br>2<br>3<br>4<br>5<br>6<br>7<br>8                     | Access to data                | 29  | Statement of who will have access to the final trial dataset, and disclosure of contractual agreements that limit such access for investigators                                                                                                                                     | 10-11 |
| 9<br>10<br>11<br>12                                      | Ancillary and post-trial care | 30  | Provisions, if any, for ancillary and post-trial care, and for compensation to those who suffer harm from trial participation                                                                                                                                                       | N/A   |
| 13<br>14<br>15<br>16<br>17<br>18<br>19<br>20<br>21<br>22 | Dissemination policy          | 31a | Plans for investigators and sponsor to communicate trial results to participants, healthcare professionals, the public, and other relevant groups (eg, via publication, reporting in results databases, or other data sharing arrangements), including any publication restrictions | 12    |
| 23<br>24<br>25                                           |                               | 31b | Authorship eligibility guidelines and any intended use of professional writers                                                                                                                                                                                                      | N/A   |
| 26<br>27<br>28<br>29<br>30                               |                               | 31c | Plans, if any, for granting public access to the full protocol, participant-level dataset, and statistical code                                                                                                                                                                     | 12    |

1  
2  
3  
4  
5  
6  
7  
8  
9  
10  
11  
12  
13  
14  
15  
16  
17  
18  
19  
20  
21  
22  
23  
24  
25  
26  
27  
28  
29  
30  
31  
32  
33  
34  
35  
36  
37  
38  
39  
40  
41  
42  
43  
44  
45  
46

1  
2  
3  
4  
5  
6  
7  
8  
9  
10  
11  
12  
13  
14  
15  
16  
17  
18  
19  
20  
21  
22  
23  
24  
25  
26  
27  
28  
29  
30  
31  
32  
33  
34  
35  
36  
37  
38  
39  
40  
41  
42  
43  
44  
45  
46

|                            |    |                                                                                                                                                                                                |                          |
|----------------------------|----|------------------------------------------------------------------------------------------------------------------------------------------------------------------------------------------------|--------------------------|
| <b>Appendices</b>          |    |                                                                                                                                                                                                |                          |
| Informed consent materials | 32 | Model consent form and other related documentation given to participants and authorised surrogates                                                                                             | Supplementary Files 1, 2 |
| Biological specimens       | 33 | Plans for collection, laboratory evaluation, and storage of biological specimens for genetic or molecular analysis in the current trial and for future use in ancillary studies, if applicable | 9                        |

\*It is strongly recommended that this checklist be read in conjunction with the SPIRIT 2013 Explanation & Elaboration for important clarification on the items. Amendments to the protocol should be tracked and dated. The SPIRIT checklist is copyrighted by the SPIRIT Group under the Creative Commons “Attribution-NonCommercial-NoDerivs 3.0 Unported” license.

## WHO Trial Registration Data Set

|                                                  |                                                                                                                                                                                                       |
|--------------------------------------------------|-------------------------------------------------------------------------------------------------------------------------------------------------------------------------------------------------------|
| 1. Primary Registry and Trial Identifying Number | Clinicaltrial.gov<br>Registration submitted, pending approval                                                                                                                                         |
| 2. Date of Registration in Primary Registry      | Clinicaltrial.gov<br>Registration submitted, pending approval                                                                                                                                         |
| 3. Secondary Identifying Numbers                 | None                                                                                                                                                                                                  |
| 4. Source(s) of Monetary or Material Support     | The Everion® wearable devices are donated by Biofourmis Singapore, and Harmony ltd. The mobile phone and cellular data are supported by PCCW ltd.                                                     |
| 5. Primary Sponsor                               | None                                                                                                                                                                                                  |
| 6. Secondary Sponsor(s)                          | None                                                                                                                                                                                                  |
| 7. Contact for Public Queries                    | Professor Ivan FN Hung MD<br>Division of Infectious Diseases,<br>Department of Medicine,<br>The University of Hong Kong,<br>Hong Kong SAR, China.<br><br>Tel: (852) 2255 4049<br>Fax: (852) 2818 6304 |

|                                               |                                                                                                                                                                                                                                                                                                                  |
|-----------------------------------------------|------------------------------------------------------------------------------------------------------------------------------------------------------------------------------------------------------------------------------------------------------------------------------------------------------------------|
|                                               | E-mail: <a href="mailto:ivanhung@hku.hk">ivanhung@hku.hk</a>                                                                                                                                                                                                                                                     |
| 8. Contact for Scientific Queries             | Professor Ivan FN Hung MD<br>Division of Infectious Diseases,<br>Department of Medicine,<br>The University of Hong Kong,<br>Hong Kong SAR, China.<br><br>Tel: (852) 2255 4049<br>Fax: (852) 2818 6304<br>E-mail: <a href="mailto:ivanhung@hku.hk">ivanhung@hku.hk</a>                                            |
| 9. Public Title                               | Using Biovitals® Sentinel to Monitor Disease Progression in Subjects Quarantined for Suspected COVID-19                                                                                                                                                                                                          |
| 10. Scientific Title                          | Using Biovitals® Sentinel to Monitor Disease Progression in Subjects Quarantined for Suspected COVID-19                                                                                                                                                                                                          |
| 11. Countries of Recruitment                  | Hong Kong, China                                                                                                                                                                                                                                                                                                 |
| 12. Health Condition(s) or Problem(s) Studied | Coronavirus Disease 2019 (COVID-19)                                                                                                                                                                                                                                                                              |
| 13. Intervention                              | <u>Intervention Arm:</u><br>Continuous physiological monitoring using Biovitals platform including (1) Armband with multiple physiological sensor, (2) Remote monitoring, and (3) Analytic platform. The armband will be worn for 23 hours a day and off for 1 hour during showering for recharging the battery. |

|                                                 |                                                                                                                                                                                                                                                                                                                                                                                                                                                                                                                                                                                                                                                  |
|-------------------------------------------------|--------------------------------------------------------------------------------------------------------------------------------------------------------------------------------------------------------------------------------------------------------------------------------------------------------------------------------------------------------------------------------------------------------------------------------------------------------------------------------------------------------------------------------------------------------------------------------------------------------------------------------------------------|
|                                                 | <p><u>Control Arm:</u><br/>Standard Care</p>                                                                                                                                                                                                                                                                                                                                                                                                                                                                                                                                                                                                     |
| <p>14. Key Inclusion and Exclusion Criteria</p> | <p><u>Inclusion criteria:</u><br/>Age ≥ 18 years<br/>Asymptomatic for COVID-19 pneumonia<br/>With close COVID-19 contact under mandatory quarantine at designated facilities in Hong Kong<br/>Voluntarily agrees to participate by providing written informed consent</p> <p><u>Exclusion criteria:</u><br/>Symptoms suggestive of COVID-19 infection including fever, upper respiratory symptoms, and/or gastrointestinal symptoms at recruitment.<br/>Confirmed COVID-19 infection<br/>Planned laboratory test for COVID-19<br/>Inability or refusal to provide informed consent<br/>Lack of skills in operating simple electronic devices</p> |
| <p>15. Study Type</p>                           | <p>Study Type: Interventional<br/>Participants Allocation: Randomized (details in protocol manuscript)<br/>Intervention Model: Parallel Assignment</p>                                                                                                                                                                                                                                                                                                                                                                                                                                                                                           |

|                              |                                                                                                                                                                                                                                                                                                                                                                                                                                                                                       |
|------------------------------|---------------------------------------------------------------------------------------------------------------------------------------------------------------------------------------------------------------------------------------------------------------------------------------------------------------------------------------------------------------------------------------------------------------------------------------------------------------------------------------|
|                              | Masking: None (Open Label)<br>Primary Purpose: Diagnostic                                                                                                                                                                                                                                                                                                                                                                                                                             |
| 16. Date of First Enrollment | March 16, 2020                                                                                                                                                                                                                                                                                                                                                                                                                                                                        |
| 17. Target Sample Size       | 200 – 1000                                                                                                                                                                                                                                                                                                                                                                                                                                                                            |
| 18. Recruitment Status       | Pending                                                                                                                                                                                                                                                                                                                                                                                                                                                                               |
| 19. Primary Outcome(s)       | Time to diagnosis of COVID-19 by RT-PCR in subjects<br>Metric: Time from quarantine to diagnosis of COVID-19<br>Time Frame: within 14 days                                                                                                                                                                                                                                                                                                                                            |
| 20. Key Secondary Outcome(s) | 1. Compliance to complete the study<br>Metric: Percentage of device usage time<br>Time Frame: within 14 days<br><br>Sensitivity and specificity of Biovitals® Sentinel to identify COVID-19 positive subjects<br>Metric: Sensitivity and specificity of Biovitals® Sentinel to identify COVID-19 positive subjects<br>Time Frame: within 14 days<br><br>Viral load of COVID-19 positive subjects<br>Metric: COVID-19 viral load by RT-PCR<br>Time Frame: On day of COVID-19 diagnosis |

|    |                                                            |
|----|------------------------------------------------------------|
| 1  |                                                            |
| 2  |                                                            |
| 3  |                                                            |
| 4  |                                                            |
| 5  | Cross infection rate within the family cluster             |
| 6  | Metric: Percentage of family members infected              |
| 7  | Time Frame: within 14 days                                 |
| 8  |                                                            |
| 9  |                                                            |
| 10 |                                                            |
| 11 | Length of hospital stay of positive subjects               |
| 12 | Metric: Length of hospital stay                            |
| 13 | Time Frame: 1 year at study completion                     |
| 14 |                                                            |
| 15 |                                                            |
| 16 |                                                            |
| 17 |                                                            |
| 18 | Length of ICU stay of positive patients                    |
| 19 | Metric: Length of ICU stay                                 |
| 20 | Time Frame: 1 year at study completion                     |
| 21 |                                                            |
| 22 |                                                            |
| 23 |                                                            |
| 24 |                                                            |
| 25 | Non-invasive and invasive ventilatory support              |
| 26 | Metric: Percentage of COVID-19 positive patients requiring |
| 27 | non-invasive and invasive ventilatory support              |
| 28 | Time Frame: 1 year at study completion                     |
| 29 |                                                            |
| 30 |                                                            |
| 31 |                                                            |
| 32 |                                                            |
| 33 | National Early Warning Score 2 rating of COVID-19 positive |
| 34 | patients                                                   |
| 35 | Metric: National Early Warning Score 2 rating              |
| 36 | Time Frame: On day of COVID-19 diagnosis                   |
| 37 |                                                            |
| 38 |                                                            |
| 39 |                                                            |
| 40 |                                                            |
| 41 |                                                            |
| 42 |                                                            |
| 43 |                                                            |
| 44 |                                                            |
| 45 |                                                            |
| 46 |                                                            |



1  
2  
3  
4  
5  
6  
7  
8  
9  
10  
11  
12  
13  
14  
15  
16  
17  
18  
19  
20  
21  
22  
23  
24  
25  
26  
27  
28  
29  
30  
31  
32  
33  
34  
35  
36  
37  
38  
39  
40  
41  
42  
43  
44  
45  
46

|  |                                        |
|--|----------------------------------------|
|  | Worsening of comorbidities             |
|  | Metric: Worsening of comorbidities     |
|  | Time Frame: 1 year at study completion |
|  | Mortality                              |
|  | Metric: Mortality                      |
|  | Time Frame: 1 year at study completion |

For peer review only

# BMJ Open

## Protocol for a Randomized Controlled Trial of an Artificial Intelligence Mobile Health Platform for Early Detection of COVID-19 in Quarantine Subjects using a Wearable Biosensor

|                                 |                                                                                                                                                                                                                                                                                                                                                                                                                                                                                                                                                                                                                                                                                                                                                                                                                                                                                                                                                                                                              |
|---------------------------------|--------------------------------------------------------------------------------------------------------------------------------------------------------------------------------------------------------------------------------------------------------------------------------------------------------------------------------------------------------------------------------------------------------------------------------------------------------------------------------------------------------------------------------------------------------------------------------------------------------------------------------------------------------------------------------------------------------------------------------------------------------------------------------------------------------------------------------------------------------------------------------------------------------------------------------------------------------------------------------------------------------------|
| Journal:                        | <i>BMJ Open</i>                                                                                                                                                                                                                                                                                                                                                                                                                                                                                                                                                                                                                                                                                                                                                                                                                                                                                                                                                                                              |
| Manuscript ID                   | bmjopen-2020-038555.R2                                                                                                                                                                                                                                                                                                                                                                                                                                                                                                                                                                                                                                                                                                                                                                                                                                                                                                                                                                                       |
| Article Type:                   | Protocol                                                                                                                                                                                                                                                                                                                                                                                                                                                                                                                                                                                                                                                                                                                                                                                                                                                                                                                                                                                                     |
| Date Submitted by the Author:   | 24-Jun-2020                                                                                                                                                                                                                                                                                                                                                                                                                                                                                                                                                                                                                                                                                                                                                                                                                                                                                                                                                                                                  |
| Complete List of Authors:       | Wong, Chun Ka; University of Hong Kong, Division of Cardiology, Department of Medicine<br>Ho, Deborah Tip-Yin ; University of Hong Kong, Division of Infectious Diseases, Department of Medicine<br>Tam, Anthony Raymond; University of Hong Kong, Division of Infectious Diseases, Department of Medicine<br>zhou, Mi; University of Hong Kong, Division of Cardiology, Department of Medicine<br>LAU, Yuk-Ming; University of Hong Kong, Division of Cardiology, Department of Medicine<br>Tang, Milky Oi-Yan; University of Hong Kong, Division of Infectious Diseases, Department of Medicine<br>Tong, Raymond Cheuk-Fung; Harmony Medical Inc.<br>Rajput, Kuldeep Singh ; Biofourmis<br>Chen, Gengbo; Biofourmis, Research and Development<br>Chan, Soon-Chee; Biofourmis, Research and Development<br>SIU, Chung-Wah; University of Hong Kong, Division of Cardiology, Department of Medicine<br>Hung, Ivan Fan-Ngai; University of Hong Kong, Division of Infectious Diseases, Department of Medicine |
| <b>Primary Subject Heading</b>: | Infectious diseases                                                                                                                                                                                                                                                                                                                                                                                                                                                                                                                                                                                                                                                                                                                                                                                                                                                                                                                                                                                          |
| Secondary Subject Heading:      | Public health                                                                                                                                                                                                                                                                                                                                                                                                                                                                                                                                                                                                                                                                                                                                                                                                                                                                                                                                                                                                |
| Keywords:                       | Infection control < INFECTIOUS DISEASES, VIROLOGY, Telemedicine < BIOTECHNOLOGY & BIOINFORMATICS                                                                                                                                                                                                                                                                                                                                                                                                                                                                                                                                                                                                                                                                                                                                                                                                                                                                                                             |
|                                 |                                                                                                                                                                                                                                                                                                                                                                                                                                                                                                                                                                                                                                                                                                                                                                                                                                                                                                                                                                                                              |

SCHOLARONE™  
Manuscripts



I, the Submitting Author has the right to grant and does grant on behalf of all authors of the Work (as defined in the below author licence), an exclusive licence and/or a non-exclusive licence for contributions from authors who are: i) UK Crown employees; ii) where BMJ has agreed a CC-BY licence shall apply, and/or iii) in accordance with the terms applicable for US Federal Government officers or employees acting as part of their official duties; on a worldwide, perpetual, irrevocable, royalty-free basis to BMJ Publishing Group Ltd ("BMJ") its licensees and where the relevant Journal is co-owned by BMJ to the co-owners of the Journal, to publish the Work in this journal and any other BMJ products and to exploit all rights, as set out in our [licence](#).

The Submitting Author accepts and understands that any supply made under these terms is made by BMJ to the Submitting Author unless you are acting as an employee on behalf of your employer or a postgraduate student of an affiliated institution which is paying any applicable article publishing charge ("APC") for Open Access articles. Where the Submitting Author wishes to make the Work available on an Open Access basis (and intends to pay the relevant APC), the terms of reuse of such Open Access shall be governed by a Creative Commons licence – details of these licences and which [Creative Commons](#) licence will apply to this Work are set out in our licence referred to above.

Other than as permitted in any relevant BMJ Author's Self Archiving Policies, I confirm this Work has not been accepted for publication elsewhere, is not being considered for publication elsewhere and does not duplicate material already published. I confirm all authors consent to publication of this Work and authorise the granting of this licence.

1  
2  
3  
4  
5  
6  
7  
8  
9

## **Protocol for a Randomized Controlled Trial of an Artificial Intelligence Mobile Health Platform for Early Detection of COVID-19 in Quarantine Subjects using a Wearable Biosensor**

10  
11  
12  
13  
14  
15  
16  
17

<sup>1</sup>Chun-Ka Wong, MBBS; <sup>2</sup>Deborah Tip-Yin HO, MMedSc; <sup>2</sup>Anthony Raymond TAM, MBBS; <sup>1</sup>Mi ZHOU, MBBS; <sup>1</sup>Yuk-Ming LAU, MBBS; <sup>2</sup>Milky Oi-Yan TANG, MSc; <sup>3</sup>Raymond Cheuk-Fung TONG, MD, PhD; <sup>4</sup>Kuldeep Singh Rajput; <sup>5</sup>Gengbo Chen, PhD; <sup>5</sup>Soon-Chee Chan; <sup>1</sup>Chung-Wah SIU, MD; and <sup>2</sup>Ivan Fan-Ngai HUNG, MD.

18  
19  
20  
21  
22  
23  
24  
25  
26  
27

Affiliations: <sup>1</sup>Division of Cardiology, Department of Medicine, the University of Hong Kong, Hong Kong SAR, China; <sup>2</sup>Division of Infectious Diseases, Department of Medicine, the University of Hong Kong, Hong Kong SAR, China; <sup>3</sup>Harmony Medical Inc., Hong Kong SAR, China; <sup>4</sup>Biofourmis, Singapore; <sup>5</sup>Research and Development, Biofourmis, Singapore.

28  
29  
30  
31  
32  
33

**Protocol Version:** COVID19\_Wearable\_1

**Protocol Date:** March 13, 2020

**Keywords:** COVID-19, Quarantine, Wearable Device, Remote Monitoring

**Wordcount:** 2617

34  
35  
36  
37  
38  
39  
40  
41  
42  
43  
44  
45  
46  
47

Address for Correspondence:

Chung-Wah SIU, MD

Cardiology Division,  
Department of Medicine,  
The University of Hong Kong,  
Hong Kong SAR, China.  
Tel: (852) 2255 4694,  
Fax: (852) 2818 6304,  
E-mail: [cwdsiu@hku.hk](mailto:cwdsiu@hku.hk)

48  
49  
50  
51  
52  
53  
54  
55  
56  
57  
58  
59  
60

Division of Infectious Diseases,  
Department of Medicine,  
The University of Hong Kong,  
Hong Kong SAR, China.  
Tel: (852) 2255 4049,  
Fax: (852) 2818 6304,  
E-mail: [ivanhung@hku.hk](mailto:ivanhung@hku.hk)

## ABSTRACT

**Introduction:** There is an outbreak of Coronavirus Disease 2019 (COVID-19) worldwide. As there is no effective therapy or vaccine yet, rigorous implementation of traditional public health measures such as isolation and quarantine remains the most effective tool to control the outbreak. When an asymptomatic individual with COVID-19 exposure is being quarantined, it is necessary to perform temperature and symptom surveillance. As such surveillance is intermittent in nature and highly dependent on self-discipline, it has limited effectiveness. Advances in biosensor technologies made it possible to continuously monitor physiological parameters using wearable biosensors with a variety of form-factors.

**Objective:** To explore the potential of using wearable biosensors to continuously monitor multi-dimensional physiological parameters for early detection of COVID-19 clinical progression.

**Method:** This randomized controlled open-labelled trial will involve 200 to 1,000 asymptomatic subjects with close COVID-19 contact under mandatory quarantine at designated facilities in Hong Kong. Subjects will be randomized to receive a remote monitoring strategy (intervention group) or standard strategy (control group) in a 1:1 ratio during the 14 day-quarantine period. In addition to fever and symptom surveillance in the control, subjects in the intervention group will wear wearable biosensors on their arms to continuously monitor skin temperature, respiratory rate, blood pressure, pulse rate, blood oxygen saturation and daily activities. These physiological parameters will be transferred in real time to a smartphone application called Biovitals® Sentinel. These data will then be processed using a cloud-based

1  
2  
3 multi-variate physiology analytics engine called Biovitals® to detect subtle  
4  
5 physiological changes. The results will be displayed on a web-based dashboard for  
6  
7 clinicians' review. The primary outcome is the time to diagnosis of COVID-19.  
8  
9

10  
11  
12 **Ethics and Dissemination:** Ethical approval obtained from institutional review board  
13  
14 at the study sites. Results will be published in peer-reviewed journals.  
15  
16  
17  
18  
19  
20  
21  
22  
23  
24  
25  
26  
27  
28  
29  
30  
31  
32  
33  
34  
35  
36  
37  
38  
39  
40  
41  
42  
43  
44  
45  
46  
47  
48  
49  
50  
51  
52  
53  
54  
55  
56  
57  
58  
59  
60

For peer review only

## STRENGTHS AND LIMITATIONS OF THIS STUDY

- Automatic physiological data collection by wearable biosensor that do not rely on self-discipline of quarantined subjects.
- Large number of physiological parameters monitored, including skin temperature, respiratory rate, blood pressure, pulse rate, blood oxygen saturation and daily activities, instead of relying solely on temperature measurement.
- Continuous data collection and analysis throughout the day.
- Limited by being single-center based and exploratory in nature.

## INTRODUCTION

Coronavirus Disease 2019 (COVID-19) emerged in December 2019,(1-4) and in mere few months has spread to more than 104 countries, resulting in an outbreak of viral pneumonia worldwide. As of March 12, 2020, the virus has reportedly caused 127,863 infections and 4,718 deaths globally.(5) The World Health Organization (WHO) declared COVID-19 a public health emergency of international concern on January 30, 2020 and further characterized it as pandemic on March 11, 2020. As there is no effective therapeutic or vaccine for the condition yet, rigorous implementation of traditional public health measures such as isolation, quarantine, social distancing, and community containment is the principle strategy used to control the COVID-19 epidemic.(6) In addition to isolating patients with confirmed COVID-19 infection from the non-infected population, it is equally if not more important to quarantine asymptomatic individuals with COVID-19 exposure in order to reduce viral spread in the community. Indeed, quarantine measures have been initiated in many countries and regions to restrict movement of asymptomatic individuals with COVID-19 exposure in the community. These individuals are required to stay at home or designated quarantine facilities. In addition, they are also asked to perform fever and symptom surveillance during the presumed incubation period (14 days). However, as such surveillance is intermittent in nature and highly dependent on self-discipline, it has limited effectiveness. Furthermore, it has been reported that as many as 50% of COVID-19 infected patients had no fever until developing full-blown disease,(3, 7) thereby body temperature surveillance *per se* may not be sufficient to detect early disease progression.

In the past few decades, advances in technology allows progressive miniaturization of electronic biosensors such that they can be incorporated into wearable devices to allow



1  
2  
3 continuous monitoring of physiological parameters such as skin temperature, heart rate,  
4 respiratory rate, oxygen saturation, perspiration and activity of ambulatory subjects in  
5 a 24/7 basis.(8, 9) Together with state-of-the-art telecommunication technologies that  
6 allow instantaneous and multi-directional massive data transfer, it is now possible to  
7 remotely monitor physiological parameters of a large number of subjects in real-time.  
8 These data can subsequently be relayed to physicians to allow timely intervention.  
9  
10 Nonetheless, the potentials of utilizing wearable biosensors to improve disease  
11 management have not been fully explored in the real-world settings. The current study  
12 aim to assess the impact of performing continuous remote monitoring of asymptomatic  
13 subjects with COVID-19 exposure under mandatory quarantine at designated facilities  
14 in Hong Kong using Biovitals® Sentinel Platform. The platform consists of a clinical-  
15 grade wearable biosensor worn on the upper arm called Everion® (Biofourmis,  
16 Singapore) which allows continuous multi-dimensional physiological parameters  
17 monitoring and an artificial intelligence-powered physiology analytical platform  
18 Biovitals® (Biofourmis, Singapore) for detecting disease progression. The research  
19 hypothesis is that by collecting continuous physiological data using Biovitals® Sentinel  
20 and patient reported outcomes, and processing them with a cloud-based analytics  
21 platform, Biovitals®, it will be possible to identify physiology changes and detect other  
22 clinically meaningful alerts that will indicate early clinical progression in quarantined  
23 subjects with COVID-19 exposure.  
24  
25  
26  
27  
28  
29  
30  
31  
32  
33  
34  
35  
36  
37  
38  
39  
40  
41  
42  
43  
44  
45  
46  
47  
48  
49  
50

## 51 **METHODS AND ANALYSIS**

52  
53 This clinical trial protocol follows the Standard Protocol Items: Recommendations for  
54 Interventional Trials (SPIRIT).(10, 11) The underlying protocol follows the  
55  
56  
57  
58  
59  
60

1  
2  
3 Consolidated Standards of Reporting Trials (CONSORT).(12, 13) The clinical trial  
4  
5 was registered on clinicaltrials.gov (NCT04343794).  
6  
7  
8  
9

## 10 **Study Design and Participants**

11  
12 This is a prospective, randomized controlled, open-labeled study. Asymptomatic  
13  
14 subjects with COVID-19 exposure at designated facilities under the compulsory  
15  
16 quarantine measure introduced on February 8, 2020 in Hong Kong, fulfilling inclusion  
17  
18 and exclusion criteria of the study will be invited to participate in this study. Table 1  
19  
20 summarizes the inclusion and exclusion criteria.  
21  
22  
23

24  
25  
26 There will be 2 phases of the subject recruitment. The initial run-in phase is a single  
27  
28 arm, open-label study design confirmation phase with approximately 100 subjects. All  
29  
30 subjects will undergo remote physiological monitoring using Biovitals® Sentinel  
31  
32 platform. The data collected from the platform and clinical data from health system will  
33  
34 be used to validate the solution and the study design for the randomized phase. In the  
35  
36 subsequent randomized phase, subjects will be randomized in a 1:1 ratio to (1)  
37  
38 Continuous remote physiological monitoring using Biovitals® Sentinel platform  
39  
40 (Intervention group) or (2) Usual care (Control group) during the 14 day-quarantine  
41  
42 period. (Figure 1)  
43  
44  
45  
46  
47  
48

49  
50 In addition to daily body temperature monitoring and symptom surveillance in the  
51  
52 Control group, subjects randomized to the Intervention group will wear a multi-  
53  
54 sensor-based wearable armband biosensor, Everion®, during the quarantine period.  
55  
56 Everion® is a wearable vital sign monitor capable of tracking heart rate, heart rate  
57  
58 variability, blood oxygen saturation, blood pulse wave, respiration rate at rest, skin  
59  
60

1  
2  
3 blood perfusion, activity, steps, skin temperature, barometric pressure and  
4  
5 electrodermal activity. The wearable biosensors will be worn for 22-23 hours per day  
6  
7 and be recharged while bathing or showering. In addition, patients will be instructed to  
8  
9 report their symptoms and record their cough sounds using the specially-designed  
10  
11 smartphone application daily. The physiological parameters obtained will be  
12  
13 automatically transferred in real-time through a specially-designed smartphone  
14  
15 application to a secured cloud storage for processing using Biovitals® Analytics Engine.  
16  
17 The results will be displayed on a web-based clinicians dashboard for review. (Figure  
18  
19 2, Figure 3, Figure 4 and Figure 5) Biovitals® Analytics Engine will process these  
20  
21 multi-dimensional physiology parameters to detect subtle physiological changes  
22  
23 preceding critical events, thereby enabling clinicians to promptly review and intervene.  
24  
25 As an additional safety measure, specific alert thresholds for individual physiological  
26  
27 parameters have also been set. Study investigators will remotely review individual  
28  
29 subject's physiological parameters every 4 hours, and order diagnostic tests for  
30  
31 COVID-19 infection through instant communication (electronic communication and/or  
32  
33 phone). In addition, after the initial run-in phase and having recruited adequate number  
34  
35 of subjects with subsequently confirmed COVID-19, the collected physiological data  
36  
37 will be used to enhance Biovitals® prediction model for COVID-19 infection using  
38  
39 machine learning technology.  
40  
41  
42  
43  
44  
45  
46  
47  
48

## 49 **Outcomes**

50  
51 The primary outcome measure is the time to detection of COVID-19 infection using  
52  
53 nasopharyngeal sampling for COVID-19 RT-PCR.  
54  
55  
56  
57  
58  
59  
60

1  
2  
3 The secondary outcomes include wearable device adherence, sensitivity, specificity,  
4 positive predictive value, negative predictive value and the area under the receiver  
5 operating characteristic (ROC) curve of Biovitals® Sentinel in identifying COVID-19  
6 subjects, viral load of COVID-19 using nasopharyngeal sampling for RT-PCR at  
7 diagnosis, cross-infection rate within family cluster, length of hospital stay, length of  
8 intensive care unit stay, non-invasive and invasive ventilation use, National Early  
9 Warning Score 2, worsening of comorbidities and mortality.

### 21 **Sample size and statistical analysis**

22  
23 Sample size for the randomization phase will be determined based on the result from  
24 the phase I run-in period involving approximately 100 subjects. Sample size of run-in  
25 period was determined by convenience sampling due to the lack of previous study with  
26 the research theme. To explore and estimate effect of longitudinally measured clinical  
27 and physiological data on time-to-event of primary and secondary outcome, joint  
28 modelling of longitudinal and time-to-event data analysis, and other statistical and/or  
29 machine learning-based methods will be utilized. Data normality of continuous  
30 variables will be assessed using skewness statistics. Baseline characteristics of the two  
31 study groups will be compared using ANOVA, chi-square or Fisher's exact tests, as  
32 appropriate. Analysis of the primary and secondary outcomes will conform to the  
33 intention-to-treat principle. Cox regression analysis will be performed to compare  
34 the time to diagnosis of COVID-19 infection between the study groups with  
35 adjustment for potential confounders. For other secondary outcomes, the  
36 generalized estimating equations model will be used to compare the differential changes  
37 in each of the outcomes across the 14-day time points between the two study arms, with  
38 adjustment for the potential confounders.

## **Randomization**

Patients will be randomized to Intervention group or Control group using a computer-generated random number to derive allocation sequence prior to enrollment in the study. Study staff responsible for enrollment will be informed of the randomization assignment after entering information of the subjects to a designated computer system. If a subject is found to be ineligible for the study after randomization, the original assignment will be re-assigned to the next eligible subject. Subjects and clinicians will not be blinded to the randomization assignment. Data staff responsible for data entry will be blinded from randomization assignment.

## **Data collection and management**

After enrollment, each subject will be assigned a unique identifier to be used in database. Data will be entered by study staff and data accuracy will be verified by study principal investigator. Data quality control measures include queries to identify missing data, outliers and discrepancies. The database will be password protected and encrypted. Only study staff will have access to the database. Subjects who withdraw from the study will have continuous monitoring stopped, usual care continued and final outcome collected for analysis.

## **Data monitoring**

Due to the minimal risk nature of the study, there is no external data and safety monitoring board. The principal investigator and study staff will monitor data internally and meet weekly in person or by phone to ensure the study is being proceeded as intended.

## **Patient and public involvement**

We received input from quarantined individuals and healthcare providers which guided the design of the current study and choice of research questions. No quarantined individuals or the public were directly involved in the design of the study and choice of outcome measures. No quarantined individuals or the public will be involved in recruitment or conduct of the study. Results of the study will be disseminated to subjects, the public and the scientific community.

## **ETHICS AND DISSEMINATION**

The investigation conforms with the principles outlined in the Declaration of Helsinki. The study protocol has been approved by the Institutional Review Board of The University of Hong Kong, and Hong Kong West Cluster, Hospital Authority, Hong Kong. Written informed consents will be obtained from all study participants by study staff responsible for recruitment (Supplementary Files 1 and 2). Important protocol modifications will be conveyed to investigators, Institutional Review Board, trial registries, regulators, journals and trial participants. After enrollment, each subject will be assigned a unique identifier to be used in database. Personal identity of subjects will not be used for any public purpose, publication, or transmitted outside of the study team.

Dataset used during the study will be available from the corresponding author on reasonable request. Collaboration with other investigators interested in optimizing quarantine strategies for COVID-19 will be welcomed. The results of the trial will be published in peer-reviewed journals and presented in conferences.

## DISCUSSION

Emerging in December 2019, the COVID-19 has spread at a rate far outstripping the capacity of many medical systems.(14) Traditionally, public health measures including isolation and quarantine are the cornerstone to curb the spread of infectious diseases by interrupting person-to-person transmission, and are particularly important when no specific therapeutics or vaccines are available.(6) Indeed, early detection of infected individuals amongst those with viral exposure followed by isolation would effectively reduce overt viral shedding in the community; nonetheless, early detection can be challenging.

Symptom and fever surveillance amongst individuals with COVID-19 exposure is a commonly used method to detect infected individuals in the absence of medical testing. However, symptom declaration and intermittent body temperature measurement *per se* may not be sufficient to detect early disease progression. Indeed, up to 50% COVID-19 infected patients were so called “asymptomatic” and did not have fever until the full-blown disease. (7) Conceivably, while fever is one of cardinal symptoms specific for active infection, many other physiological alterations such as heart rate, respiratory rate, oxygen saturation, perspiration and so on may likewise indicate active infection. However, practically speaking, they are more difficult to accurately measure without medical training.

The intervention arm of current study differs from the existing symptom and fever surveillance-based quarantine program in several important aspects. By incorporating a wide-range of continuously collected physiological parameters instead of solely

1  
2  
3 relying on intermittent body temperature, it is possible to more accurately assess  
4 individual's physiological changes for detecting early disease progression. (9) At the  
5  
6 same time, the use of contemporary mobile communication technology facilitates  
7  
8 automatic collection and transfer of physiological data. These measures can enhance  
9  
10 patient compliance with the monitoring system as well as greatly shorten the time  
11  
12 between detection of an abnormality and subsequent intervention. In the past decades,  
13  
14 wearable technology has been increasingly used for medical diagnosis, most notably in  
15  
16 arrhythmia detection.(15-21) Indeed, by continuously collecting multi-dimensional  
17  
18 physiological parameters and analyzing them with machine learning techniques, it is  
19  
20 possible to acquire a much more in-depth understanding of different disease processes,  
21  
22 which potentially allows us to improve clinical management. Nonetheless, such  
23  
24 potentials have not been fully explored in the real-world disease management. In short  
25  
26 term, the results of the current study may provide insights regarding detecting disease  
27  
28 progression of COVID-19 infection through physiological data monitoring and possible  
29  
30 ways to reduce the disease spread. In long term, the study may demonstrate an  
31  
32 important example of how wearable technologies and machine learning techniques can  
33  
34 be incorporated into existing medical services.  
35  
36  
37  
38  
39  
40  
41  
42  
43  
44  
45  
46  
47  
48  
49  
50  
51  
52  
53  
54  
55  
56  
57  
58  
59  
60

The clinical trial is limited by its single-centered characteristic and being exploratory in nature.



**Author Contributions:**

CWS, IFNH, CKW, RCFT and KSR contributed to the conception and design of the study. DTYH, ART, MZ and MOYT contributed to the acquisition of data. Data analysis and interpretation will be conducted by CWS, IFNH, CKW, RCFT, KSR, GC, SCC and YML. CWS, IFNH and CKW wrote first draft of the protocol. ART, MZ and YML revised the protocol critically for important intellectual content. All authors have read and approved the final version of the manuscript to be published.

**Funding statement:**

None.

**Acknowledgement:**

The Everion® wearable devices are donated by Biofourmis Singapore, and Harmony Ltd. The mobile phone and cellular data are supported by PCCW Ltd.

**Declaration of interest:**

RCFT is employed by Harmony Medical Inc., which donated Everion® wearable devices. GC and SSC are employed by Biofourmis, which donated Everion® wearable devices.

**Legends:**

Figure 1: Study flow.

Figure 2: Wearable device and Home screen of the dedicated smartphone app.

Figure 3: Smartphone application screen for symptom surveillance.

Figure 4: Smartphone application screen for cough sound recording.

Figure 5: Web-based dashboard for clinicians.

**Supplementary Files:**

Supplementary File 1: Consent form of the run-in phase in English

Supplementary File 2: Consent form of the randomization phase in English

**Table 1. Inclusion and exclusion criteria*****Inclusion criteria***

- Age  $\geq$  18 years
- Asymptomatic for COVID-19 pneumonia
- With close COVID-19 contact under mandatory quarantine at designated facilities in Hong Kong
- Voluntarily agrees to participate by providing written informed consent

***Exclusion criteria***

- Symptoms suggestive of COVID-19 infection including fever, upper respiratory symptoms, and/or gastrointestinal symptoms at recruitment.
- Confirmed COVID-19 infection
- Planned laboratory test for COVID-19
- Inability or refusal to provide informed consent
- Lack of skills in operating simple electronic devices

## REFERENCES

1. Li Q, Guan X, Wu P, Wang X, Zhou L, Tong Y, et al. Early Transmission Dynamics in Wuhan, China, of Novel Coronavirus-Infected Pneumonia. *N Engl J Med*. 2020.
2. Wu JT, Leung K, Leung GM. Nowcasting and forecasting the potential domestic and international spread of the 2019-nCoV outbreak originating in Wuhan, China: a modelling study. *Lancet*. 2020;395(10225):689-97.
3. Guan WJ, Ni ZY, Hu Y, Liang WH, Ou CQ, He JX, et al. Clinical Characteristics of Coronavirus Disease 2019 in China. *N Engl J Med*. 2020.
4. Chan JF, Yuan S, Kok KH, To KK, Chu H, Yang J, et al. A familial cluster of pneumonia associated with the 2019 novel coronavirus indicating person-to-person transmission: a study of a family cluster. *Lancet*. 2020;395(10223):514-23.
5. Dong E, Du H, Gardner L. An interactive web-based dashboard to track COVID-19 in real time. *Lancet Infect Dis*. 2020.
6. Hellewell J, Abbott S, Gimma A, Bosse NI, Jarvis CI, Russell TW, et al. Feasibility of controlling COVID-19 outbreaks by isolation of cases and contacts. *Lancet Glob Health*. 2020.
7. Kenji Mizumoto KK, Alexander Zarebski, Gerardo Chowell. Estimating the Asymptomatic Proportion of 2019 Novel Coronavirus onboard the Princess Cruises Ship, 2020. *medRxiv*. 2020.
8. van Vliet M, Donnelly JP, Potting CM, Blijlevens NM. Continuous non-invasive monitoring of the skin temperature of HSCT recipients. *Support Care Cancer*. 2010;18(1):37-42.
9. Pevnick JM, Birkeland K, Zimmer R, Elad Y, Kedan I. Wearable technology for cardiology: An update and framework for the future. *Trends Cardiovasc Med*. 2018;28(2):144-50.
10. Chan AW, Tetzlaff JM, Altman DG, Laupacis A, Gotzsche PC, Krleza-Jeric K, et al. SPIRIT 2013 statement: defining standard protocol items for clinical trials. *Ann Intern Med*. 2013;158(3):200-7.
11. Chan AW, Tetzlaff JM, Gotzsche PC, Altman DG, Mann H, Berlin JA, et al. SPIRIT 2013 explanation and elaboration: guidance for protocols of clinical trials. *BMJ*. 2013;346:e7586.
12. Altman DG, Schulz KF, Moher D, Egger M, Davidoff F, Elbourne D, et al. The revised CONSORT statement for reporting randomized trials: explanation and elaboration. *Ann Intern Med*. 2001;134(8):663-94.
13. Moher D, Schulz KF, Altman DG, Consort. The CONSORT statement: revised recommendations for improving the quality of reports of parallel group randomized trials. *BMC Med Res Methodol*. 2001;1:2.
14. Camps JA, Zuur C, Blokland JA, Broerse JJ, Pauwels EK. A breathing lung phantom for 81mKr lung ventilation studies its use in dosimetry and quality control. *Eur J Nucl Med*. 1988;14(11):529-32.
15. Guo Y, Wang H, Zhang H, Liu T, Liang Z, Xia Y, et al. Mobile Photoplethysmographic Technology to Detect Atrial Fibrillation. *J Am Coll Cardiol*. 2019;74(19):2365-75.
16. Perez MV, Mahaffey KW, Hedlin H, Rumsfeld JS, Garcia A, Ferris T, et al. Large-Scale Assessment of a Smartwatch to Identify Atrial Fibrillation. *N Engl J Med*. 2019;381(20):1909-17.
17. Poh MZ, Loddenkemper T, Swenson NC, Goyal S, Madsen JR, Picard RW. Continuous monitoring of electrodermal activity during epileptic seizures using a wearable sensor. *Conf Proc IEEE Eng Med Biol Soc*. 2010;2010:4415-8.
18. Poh MZ, Loddenkemper T, Reinsberger C, Swenson NC, Goyal S, Sabtala MC, et al. Convulsive seizure detection using a wrist-worn electrodermal activity and accelerometry biosensor. *Epilepsia*. 2012;53(5):e93-7.

- 1  
2  
3  
4  
5  
6  
7  
8  
9  
10  
11  
12  
13  
14  
15  
16  
17  
18  
19  
20  
21  
22  
23  
24  
25  
26  
27  
28  
29  
30  
31  
32  
33  
34  
35  
36  
37  
38  
39  
40  
41  
42  
43  
44  
45  
46  
47  
48  
49  
50  
51  
52  
53  
54  
55  
56  
57  
58  
59  
60
19. Chan PH, Wong CK, Pun L, Wong YF, Wong MM, Chu DW, et al. Diagnostic performance of an automatic blood pressure measurement device, Microlife WatchBP Home A, for atrial fibrillation screening in a real-world primary care setting. *BMJ Open*. 2017;7(6):e013685.
20. Chan PH, Wong CK, Pun L, Wong YF, Wong MM, Chu DW, et al. Head-to-Head Comparison of the AliveCor Heart Monitor and Microlife WatchBP Office AFIB for Atrial Fibrillation Screening in a Primary Care Setting. *Circulation*. 2017;135(1):110-2.
21. Chan PH, Wong CK, Poh YC, Pun L, Leung WW, Wong YF, et al. Diagnostic Performance of a Smartphone-Based Photoplethysmographic Application for Atrial Fibrillation Screening in a Primary Care Setting. *J Am Heart Assoc*. 2016;5(7).

For peer review only



Primary endpoint: the time to detection of COVID-19 infection using nasopharyngeal sampling for COVID-19 RT-PCR

**Figure 1**

Figure 1: Study flow.

254x190mm (72 x 72 DPI)

1  
2  
3  
4  
5  
6  
7  
8  
9  
10  
11  
12  
13  
14  
15  
16  
17  
18  
19  
20  
21  
22  
23  
24  
25  
26  
27  
28  
29  
30  
31  
32  
33  
34  
35  
36  
37  
38  
39  
40  
41  
42  
43  
44  
45  
46  
47  
48  
49  
50  
51  
52  
53  
54  
55  
56  
57  
58  
59  
60



**Figure 2**

Figure 2: Wearable device and Home screen of the dedicated smartphone app.

254x190mm (72 x 72 DPI)



**Figure 3**

Figure 3: Smartphone application screen for symptom surveillance.

254x190mm (72 x 72 DPI)



1  
2  
3  
4  
5  
6  
7  
8  
9  
10  
11  
12  
13  
14  
15  
16  
17  
18  
19  
20  
21  
22  
23  
24  
25  
26  
27  
28  
29  
30  
31  
32  
33  
34  
35  
36  
37  
38  
39  
40  
41  
42  
43  
44  
45  
46  
47  
48  
49  
50  
51  
52  
53  
54  
55  
56  
57  
58  
59  
60



**Figure 4**

Figure 4: Smartphone application screen for cough sound recording.  
254x190mm (72 x 72 DPI)

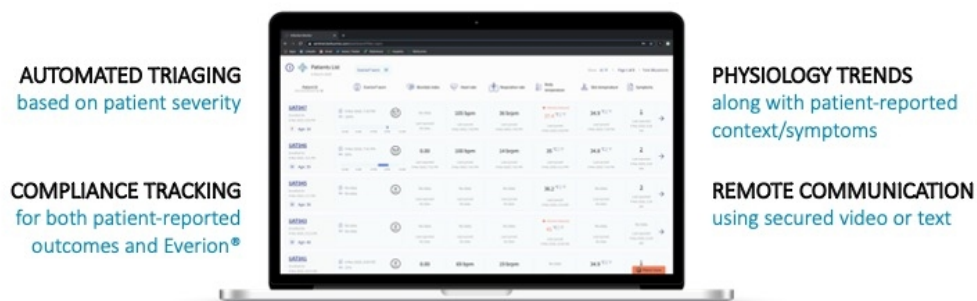**Figure 5**

Figure 5: Web-based dashboard for clinicians.

254x190mm (72 x 72 DPI)

## CONSENT FORM (Run-in Phase)

Study Name: Using Biovitals® in Early Detection of Progression of Disease  
in Patients Suspected with COVID-19

Version No.: COVID19\_Biovitals\_Consent\_2\_run\_in\_en (17/03/2020)

Protocol No.: COVID19\_Biovitals\_Protocol\_1

Study Site: Hospitals of the Hospital Authority, and  
Quarantine Sites of Hong Kong SAR Government

Study Doctors: Prof HUNG Fan Ngai Ivan and Prof. SIU Chung Wah David

---

You are being invited to take part in a research study. Before you decide, it is important to understand why the research is being done and what it will involve. Please take time to read the following information carefully. Ask the study doctor or research staff any questions you may have before signing the attached consent form.

### **About This Study**

The purpose of our study is to explore the potential of state-of-the-art wearable technology for remote monitoring of patients with suspected COVID-19 infection in order to achieve early diagnosis of the infection and prompt identification of complication to allow timely management.

### **Why have I been chosen?**

You are considered high risk from having COVID-19, a condition associated with significant morbidity and mortality. Early diagnosis of the infection and prompt identification of complication would allow delivery of timely management, therefore you are invited into our study to undergo remote monitoring with wearable technology. We plan to recruit a total of 100 patients.

### **What will happen to me if I take part?**

You will receive a Biovotion® armband with multiple sensors for telemonitoring of your health status.

### **What are the benefits of participating?**

Taking part in this study may or may not make your health better. Information from this study will help doctors learn more about the value of using remote monitoring with

1  
2  
3  
4  
5  
6  
7  
wearable technology. This information will help patients in the future.

8  
9  
**What if something goes wrong?**

10  
11  
12  
13  
14  
15  
16  
17  
18  
19  
20  
21  
22  
23  
24  
25  
26  
27  
28  
29  
30  
31  
32  
33  
34  
35  
36  
37  
38  
39  
40  
41  
42  
43  
44  
45  
46  
47  
48  
49  
50  
51  
52  
53  
54  
55  
56  
57  
58  
59  
60  
In the unlikely event of harm resulting directly from your participation in this study, medical treatment will be available. There are no special compensation arrangements provided to you. If you are harmed due to someone's negligence, then you may have grounds for a legal action but you may have to pay for it. Regardless of this, if you wish to complain about any aspect of the way you have been approached or treated during the course of this study, the normal health service complaints mechanisms may be available to you. If you have any queries related to the insurance coverage from your own insurer(s) for your participation in the study, please discuss with your insurance consultant.

**What are the alternatives for treatment?**

Your participation in this study is voluntary. You may choose not to participate in this study. You may decline to participate by simply telling your doctor. If you decide not to participate in this study, your follow-up appointments will be scheduled and conducted as directed by your physician. Your decision will not in any way affect your medical care or treatment.

**What if new information becomes available?**

During the course of the study, if any new information becomes available that may relate to your willingness to continue to participate in this study, your research doctor will tell you about it and discuss with you. You also have the rights of access to personal data and known study results, if and when needed.

**Will my participation in this study be kept confidential?**

As a subject in this research study, all your information will be kept confidential. Your name or your personal identity will not be used for any public purpose, publication, or transmitted outside of the medical centre.

Under the laws of the Hong Kong Special Administrative Region and, in particular, the Personal Data (Privacy) Ordinance, Cap 486, you enjoy or may enjoy rights for the protection of the confidentiality of your personal data, such as those regarding the collection, custody, retention, management, control, use (including analysis or comparison), transfer in or out of Hong Kong, non-disclosure, erasure and/or in any way dealing with or disposing of any of your personal data in or for this study. By

1  
2  
3  
4 consenting to participate in this study, you expressly authorize the access to, the use of,  
5 and the retention of your personal data by the Investigator and members of his research  
6 team, and HKU/HA HKW IRB for the purposes and in the manner described in this  
7 informed consent process.  
8  
9

10  
11 For any query, you should consult the Privacy Commissioner for Privacy Data or his  
12 office (Tel No. 2827 2827) as to the proper monitoring or supervision of your personal  
13 data protection so that your full awareness and understanding of the significance of  
14 compliance with the law governing privacy data is assured.  
15  
16

17  
18 **Who should I contact if have questions?**  
19

20 If you have any questions regarding this study, you may contact Prof. SIU Chung Wah  
21 David or Prof FUNG Fan Ngai Ivan at XXXXXXXXX. If you have any queries regarding  
22 your rights in the study, you may contact the Secretary of Institutional Review Board  
23 of the University of Hong Kong / Hospital Authority Hong Kong West Cluster at 2255  
24 4086.  
25  
26  
27  
28  
29  
30  
31  
32  
33  
34  
35  
36  
37  
38  
39  
40  
41  
42  
43  
44  
45  
46  
47  
48  
49  
50  
51  
52  
53  
54  
55  
56  
57  
58  
59  
60

By signing below, I agree that:

1. I confirm that I have read and understood the information sheet for the above study and have had the opportunity to ask questions.
2. I understand that my participation is voluntary and that I am free to withdraw at any time, without giving any reason, without my medical care or legal rights being affected.
3. I understand that sections of any of my medical notes may be looked at by responsible individuals or from regulatory authorities where it is relevant to my taking part in research. I give permission for these individuals to have access to my records.
4. I agree to take part in the above study.

Title of the Project: Using Biovitals® in Early Detection of Progression of Disease  
in Patients Suspected with COVID-19

Patient Identification Number for this trial: \_\_\_\_\_

Participant's Signature: \_\_\_\_\_

Participant's Name: \_\_\_\_\_

Date: \_\_\_\_\_

Investigator's Signature: \_\_\_\_\_

Investigator's Name: \_\_\_\_\_

Date: \_\_\_\_\_

Witness's Signature: \_\_\_\_\_

Witness's Name: \_\_\_\_\_

Date: \_\_\_\_\_

1  
2  
3  
4  
5  
6  
7

## CONSENT FORM (Randomization Phase)

8 Study Name: Using Biovitals® in Early Detection of Progression of Disease  
9 in Patients Suspected with COVID-19  
10  
11  
12 Version No.: COVID19\_Biovitals\_Consent\_2\_randomization\_en (17/03/2020)  
13 Protocol No: COVID19\_Biovitals\_Protocol\_1  
14 Study Site: Hospitals of the Hospital Authority, and  
15 Quarantine Sites of Hong Kong SAR Government  
16  
17 Study Doctors: Prof HUNG Fan Ngai Ivan and Prof. SIU Chung Wah David  
18  
19  
20

---

21  
22  
23 You are being invited to take part in a research study. Before you decide, it is important  
24 to understand why the research is being done and what it will involve. Please take time  
25 to read the following information carefully. Ask the study doctor or research staff any  
26 questions you may have before signing the attached consent form.  
27  
28  
29

### About This Study

30  
31  
32 The purpose of our study is to explore the potential of state-of-the-art wearable  
33 technology for remote monitoring of patients with suspected COVID-19 infection in  
34 order to achieve early diagnosis of the infection and prompt identification of  
35 complication to allow timely management.  
36  
37  
38

### Why have I been chosen?

39  
40  
41 You are considered high risk from having COVID-19, a condition associated with  
42 significant morbidity and mortality. Early diagnosis of the infection and prompt  
43 identification of complication would allow delivery of timely management, therefore  
44 you are invited into our study to undergo remote monitoring with wearable technology.  
45 We plan to recruit a total of 200 patients.  
46  
47  
48  
49

### What will happen to me if I take part?

50  
51 You will be randomized to receive standard of care or addition of Biovotion® armband  
52 with multiple sensors for telemonitoring of your health status. If clinicians detected  
53 abnormality from your measured parameters, further medical investigation or  
54 intervention might be arranged.  
55  
56  
57  
58  
59  
60

### **What are the benefits of participating?**

Taking part in this study may or may not make your health better. Information from this study will help doctors learn more about the value of using remote monitoring with wearable technology. This information will help patients in the future.

### **What if something goes wrong?**

In the unlikely event of harm resulting directly from your participation in this study, medical treatment will be available. There are no special compensation arrangements provided to you. If you are harmed due to someone's negligence, then you may have grounds for a legal action but you may have to pay for it. Regardless of this, if you wish to complain about any aspect of the way you have been approached or treated during the course of this study, the normal health service complaints mechanisms may be available to you. If you have any queries related to the insurance coverage from your own insurer(s) for your participation in the study, please discuss with your insurance consultant.

### **What are the alternatives for treatment?**

Your participation in this study is voluntary. You may choose not to participate in this study. You may decline to participate by simply telling your doctor. If you decide not to participate in this study, your follow-up appointments will be scheduled and conducted as directed by your physician. Your decision will not in any way affect your medical care or treatment.

### **What if new information becomes available?**

During the course of the study, if any new information becomes available that may relate to your willingness to continue to participate in this study, your research doctor will tell you about it and discuss with you. You also have the rights of access to personal data and known study results, if and when needed.

### **Will my participation in this study be kept confidential?**

As a subject in this research study, all your information will be kept confidential. Your name or your personal identity will not be used for any public purpose, publication, or transmitted outside of the medical centre.

Under the laws of the Hong Kong Special Administrative Region and, in particular, the Personal Data (Privacy) Ordinance, Cap 486, you enjoy or may enjoy rights for the protection of the confidentiality of your personal data, such as those regarding the



1  
2  
3  
4 collection, custody, retention, management, control, use (including analysis or  
5 comparison), transfer in or out of Hong Kong, non-disclosure, erasure and/or in any  
6 way dealing with or disposing of any of your personal data in or for this study. By  
7 consenting to participate in this study, you expressly authorize the access to, the use of,  
8 and the retention of your personal data by the Investigator and members of his research  
9 team, and HKU/HA HKW IRB for the purposes and in the manner described in this  
10 informed consent process.  
11  
12  
13  
14

15 For any query, you should consult the Privacy Commissioner for Privacy Data or his  
16 office (Tel No. 2827 2827) as to the proper monitoring or supervision of your personal  
17 data protection so that your full awareness and understanding of the significance of  
18 compliance with the law governing privacy data is assured.  
19  
20  
21  
22

### 23 **Who should I contact if have questions?**

24 If you have any questions regarding this study, you may contact Prof. SIU Chung Wah  
25 David or Prof FUNG Fan Ngai Ivan at XXXXXXXXX. If you have any queries regarding  
26 your rights in the study, you may contact the Secretary of Institutional Review Board  
27 of the University of Hong Kong / Hospital Authority Hong Kong West Cluster at 2255  
28 4086.  
29  
30  
31  
32  
33  
34  
35  
36  
37  
38  
39  
40  
41  
42  
43  
44  
45  
46  
47  
48  
49  
50  
51  
52  
53  
54  
55  
56  
57  
58  
59  
60

By signing below, I agree that:

1. I confirm that I have read and understood the information sheet for the above study and have had the opportunity to ask questions.
2. I understand that my participation is voluntary and that I am free to withdraw at any time, without giving any reason, without my medical care or legal rights being affected.
3. I understand that sections of any of my medical notes may be looked at by responsible individuals or from regulatory authorities where it is relevant to my taking part in research. I give permission for these individuals to have access to my records.
4. I agree to take part in the above study.

Title of the Project: Using Biovitals® in Early Detection of Progression of Disease  
in Patients Suspected with COVID-19

Patient Identification Number for this trial: \_\_\_\_\_

Participant's Signature: \_\_\_\_\_

Participant's Name: \_\_\_\_\_

Date: \_\_\_\_\_

Investigator's Signature: \_\_\_\_\_

Investigator's Name: \_\_\_\_\_

Date: \_\_\_\_\_

Witness's Signature: \_\_\_\_\_

Witness's Name: \_\_\_\_\_

Date: \_\_\_\_\_

## SPIRIT 2013 Checklist: Recommended items to address in a clinical trial protocol and related documents

| Section/item                      | ItemNo | Description                                                                                                  | Page                        |
|-----------------------------------|--------|--------------------------------------------------------------------------------------------------------------|-----------------------------|
| <b>Administrative information</b> |        |                                                                                                              |                             |
| Title                             | 1      | Descriptive title identifying the study design, population, interventions, and, if applicable, trial acronym | 1                           |
| Trial registration                | 2a     | Trial identifier and registry name. If not yet registered, name of intended registry                         | 7                           |
|                                   | 2b     | All items from the World Health Organization Trial Registration Data Set                                     | Uploaded to BMJ Open server |
| Protocol version                  | 3      | Date and version identifier                                                                                  | 1                           |
| Funding                           | 4      | Sources and types of financial, material, and other support                                                  | 15                          |
| Roles and responsibilities        | 5a     | Names, affiliations, and roles of protocol contributors                                                      | 1, 15                       |
|                                   | 5b     | Name and contact information for the trial sponsor                                                           | 15                          |

|  |    |                                                                                                                                                                                                                                                                                          |            |
|--|----|------------------------------------------------------------------------------------------------------------------------------------------------------------------------------------------------------------------------------------------------------------------------------------------|------------|
|  | 5c | Role of study sponsor and funders, if any, in study design; collection, management, analysis, and interpretation of data; writing of the report; and the decision to submit the report for publication, including whether they will have ultimate authority over any of these activities | 15         |
|  | 5d | Composition, roles, and responsibilities of the coordinating centre, steering committee, endpoint adjudication committee, data management team, and other individuals or groups overseeing the trial, if applicable (see Item 21a for data monitoring committee)                         | 10, 11, 15 |

1  
2  
3  
4  
5  
6  
7  
8  
9  
10  
11  
12  
13  
14  
15  
16  
17  
18  
19  
20  
21  
22  
23  
24  
25  
26  
27  
28  
29  
30  
31  
32  
33  
34  
35  
36  
37  
38  
39  
40  
41  
42  
43  
44  
45  
46

|                          |    |                                                                                                                                                                                                           |     |
|--------------------------|----|-----------------------------------------------------------------------------------------------------------------------------------------------------------------------------------------------------------|-----|
| <b>Introduction</b>      |    |                                                                                                                                                                                                           |     |
| Background and rationale | 6a | Description of research question and justification for undertaking the trial, including summary of relevant studies (published and unpublished) examining benefits and harms for each intervention        | 5-6 |
|                          | 6b | Explanation for choice of comparators                                                                                                                                                                     | 5-6 |
| Objectives               | 7  | Specific objectives or hypotheses                                                                                                                                                                         | 6   |
| Trial design             | 8  | Description of trial design including type of trial (eg, parallel group, crossover, factorial, single group), allocation ratio, and framework (eg, superiority, equivalence, noninferiority, exploratory) | 7   |

| <b>Methods: Participants, interventions, and outcomes</b> |     |                                                                                                                                                                                                |            |
|-----------------------------------------------------------|-----|------------------------------------------------------------------------------------------------------------------------------------------------------------------------------------------------|------------|
| Study setting                                             | 9   | Description of study settings (eg, community clinic, academic hospital) and list of countries where data will be collected. Reference to where list of study sites can be obtained             | 7          |
| Eligibility criteria                                      | 10  | Inclusion and exclusion criteria for participants. If applicable, eligibility criteria for study centres and individuals who will perform the interventions (eg, surgeons, psychotherapists)   | 7, Table 1 |
| Interventions                                             | 11a | Interventions for each group with sufficient detail to allow replication, including how and when they will be administered                                                                     | 7-9        |
|                                                           | 11b | Criteria for discontinuing or modifying allocated interventions for a given trial participant (eg, drug dose change in response to harms, participant request, or improving/worsening disease) | N/A        |
|                                                           | 11c | Strategies to improve adherence to intervention protocols, and any procedures for monitoring adherence (eg, drug tablet return, laboratory tests)                                              | 7-9        |
|                                                           | 11d | Relevant concomitant care and interventions that are permitted or prohibited during the trial                                                                                                  | 7-9        |

|                      |    |                                                                                                                                                                                                                                                                                                                                                                                |             |
|----------------------|----|--------------------------------------------------------------------------------------------------------------------------------------------------------------------------------------------------------------------------------------------------------------------------------------------------------------------------------------------------------------------------------|-------------|
| Outcomes             | 12 | Primary, secondary, and other outcomes, including the specific measurement variable (eg, systolic blood pressure), analysis metric (eg, change from baseline, final value, time to event), method of aggregation (eg, median, proportion), and time point for each outcome. Explanation of the clinical relevance of chosen efficacy and harm outcomes is strongly recommended | 9           |
| Participant timeline | 13 | Time schedule of enrolment, interventions (including any run-ins and washouts), assessments, and visits for participants. A schematic diagram is highly recommended (see Figure)                                                                                                                                                                                               | 7, Figure 1 |
| Sample size          | 14 | Estimated number of participants needed to achieve study objectives and how it was determined, including clinical and statistical assumptions supporting any sample size calculations                                                                                                                                                                                          | 9           |
| Recruitment          | 15 | Strategies for achieving adequate participant enrolment to reach target sample size                                                                                                                                                                                                                                                                                            | 7           |

1  
2  
3  
4  
5  
6  
7  
8  
9  
10  
11  
12  
13  
14  
15  
16  
17  
18  
19  
20  
21  
22  
23  
24  
25  
26  
27  
28  
29  
30  
31  
32  
33  
34  
35  
36  
37  
38  
39  
40  
41  
42  
43  
44  
45  
46

|                                                                     |     |                                                                                                                                                                                                                                                                                                                                                          |    |
|---------------------------------------------------------------------|-----|----------------------------------------------------------------------------------------------------------------------------------------------------------------------------------------------------------------------------------------------------------------------------------------------------------------------------------------------------------|----|
| <b>Methods: Assignment of interventions (for controlled trials)</b> |     |                                                                                                                                                                                                                                                                                                                                                          |    |
| Allocation:                                                         |     |                                                                                                                                                                                                                                                                                                                                                          |    |
| Sequence generation                                                 | 16a | Method of generating the allocation sequence (eg, computer-generated random numbers), and list of any factors for stratification. To reduce predictability of a random sequence, details of any planned restriction (eg, blocking) should be provided in a separate document that is unavailable to those who enrol participants or assign interventions | 10 |
| Allocation concealment mechanism                                    | 16b | Mechanism of implementing the allocation sequence (eg, central telephone; sequentially numbered, opaque, sealed envelopes), describing any steps to conceal the sequence until interventions are assigned                                                                                                                                                | 10 |
| Implementation                                                      | 16c | Who will generate the allocation sequence, who will enrol participants, and who will assign participants to interventions                                                                                                                                                                                                                                | 10 |
| Blinding (masking)                                                  | 17a | Who will be blinded after assignment to interventions (eg, trial participants, care providers, outcome assessors, data analysts), and how                                                                                                                                                                                                                | 10 |



1  
2  
3  
4  
5  
6  
7  
8  
9  
10  
11  
12  
13  
14  
15  
16  
17  
18  
19  
20  
21  
22  
23  
24  
25  
26  
27  
28  
29  
30  
31  
32  
33  
34  
35  
36  
37  
38  
39  
40  
41  
42  
43  
44  
45  
46

|  |     |                                                                                                                                                      |     |
|--|-----|------------------------------------------------------------------------------------------------------------------------------------------------------|-----|
|  | 17b | If blinded, circumstances under which unblinding is permissible, and procedure for revealing a participant's allocated intervention during the trial | N/A |
|--|-----|------------------------------------------------------------------------------------------------------------------------------------------------------|-----|

For peer review only

| <b>Methods: Data collection, management, and analysis</b> |     |                                                                                                                                                                                                                                                                                                                                                                                                              |       |
|-----------------------------------------------------------|-----|--------------------------------------------------------------------------------------------------------------------------------------------------------------------------------------------------------------------------------------------------------------------------------------------------------------------------------------------------------------------------------------------------------------|-------|
| Data collection methods                                   | 18a | Plans for assessment and collection of outcome, baseline, and other trial data, including any related processes to promote data quality (eg, duplicate measurements, training of assessors) and a description of study instruments (eg, questionnaires, laboratory tests) along with their reliability and validity, if known. Reference to where data collection forms can be found, if not in the protocol | 10-11 |
|                                                           | 18b | Plans to promote participant retention and complete follow-up, including list of any outcome data to be collected for participants who discontinue or deviate from intervention protocols                                                                                                                                                                                                                    | 10    |
| Data management                                           | 19  | Plans for data entry, coding, security, and storage, including any related processes to promote data quality (eg, double data entry; range checks for data values). Reference to where details of data management procedures can be found, if not in the protocol                                                                                                                                            | 10    |
| Statistical methods                                       | 20a | Statistical methods for analysing primary and secondary outcomes. Reference to where other details of the statistical analysis plan can be found, if not in the protocol                                                                                                                                                                                                                                     | 9     |

|  |     |                                                                                                                                                                                 |   |
|--|-----|---------------------------------------------------------------------------------------------------------------------------------------------------------------------------------|---|
|  | 20b | Methods for any additional analyses (eg, subgroup and adjusted analyses)                                                                                                        | 9 |
|  | 20c | Definition of analysis population relating to protocol non-adherence (eg, as randomised analysis), and any statistical methods to handle missing data (eg, multiple imputation) | 9 |

For peer review only

1  
2  
3  
4  
5  
6  
7  
8  
9  
10  
11  
12  
13  
14  
15  
16  
17  
18  
19  
20  
21  
22  
23  
24  
25  
26  
27  
28  
29  
30  
31  
32  
33  
34  
35  
36  
37  
38  
39  
40  
41  
42  
43  
44  
45  
46

| <b>Methods: Monitoring</b> |     |                                                                                                                                                                                                                                                                                                                                       |    |
|----------------------------|-----|---------------------------------------------------------------------------------------------------------------------------------------------------------------------------------------------------------------------------------------------------------------------------------------------------------------------------------------|----|
| Data monitoring            | 21a | Composition of data monitoring committee (DMC); summary of its role and reporting structure; statement of whether it is independent from the sponsor and competing interests; and reference to where further details about its charter can be found, if not in the protocol. Alternatively, an explanation of why a DMC is not needed | 11 |
|                            | 21b | Description of any interim analyses and stopping guidelines, including who will have access to these interim results and make the final decision to terminate the trial                                                                                                                                                               | 11 |
| Harms                      | 22  | Plans for collecting, assessing, reporting, and managing solicited and spontaneously reported adverse events and other unintended effects of trial interventions or trial conduct                                                                                                                                                     | 11 |
| Auditing                   | 23  | Frequency and procedures for auditing trial conduct, if any, and whether the process will be independent from investigators and the sponsor                                                                                                                                                                                           | 11 |

| <b>Ethics and dissemination</b> |     |                                                                                                                                                                                                                                  |    |
|---------------------------------|-----|----------------------------------------------------------------------------------------------------------------------------------------------------------------------------------------------------------------------------------|----|
| Research ethics approval        | 24  | Plans for seeking research ethics committee/institutional review board (REC/IRB) approval                                                                                                                                        | 11 |
| Protocol amendments             | 25  | Plans for communicating important protocol modifications (eg, changes to eligibility criteria, outcomes, analyses) to relevant parties (eg, investigators, REC/IRBs, trial participants, trial registries, journals, regulators) | 11 |
| Consent or assent               | 26a | Who will obtain informed consent or assent from potential trial participants or authorised surrogates, and how (see Item 32)                                                                                                     | 11 |
|                                 | 26b | Additional consent provisions for collection and use of participant data and biological specimens in ancillary studies, if applicable                                                                                            | 11 |
| Confidentiality                 | 27  | How personal information about potential and enrolled participants will be collected, shared, and maintained in order to protect confidentiality before, during, and after the trial                                             | 12 |
| Declaration of interests        | 28  | Financial and other competing interests for principal investigators for the overall trial and each study site                                                                                                                    | 15 |

|                               |     |                                                                                                                                                                                                                                                                                     |       |
|-------------------------------|-----|-------------------------------------------------------------------------------------------------------------------------------------------------------------------------------------------------------------------------------------------------------------------------------------|-------|
| Access to data                | 29  | Statement of who will have access to the final trial dataset, and disclosure of contractual agreements that limit such access for investigators                                                                                                                                     | 10-11 |
| Ancillary and post-trial care | 30  | Provisions, if any, for ancillary and post-trial care, and for compensation to those who suffer harm from trial participation                                                                                                                                                       | N/A   |
| Dissemination policy          | 31a | Plans for investigators and sponsor to communicate trial results to participants, healthcare professionals, the public, and other relevant groups (eg, via publication, reporting in results databases, or other data sharing arrangements), including any publication restrictions | 12    |
|                               | 31b | Authorship eligibility guidelines and any intended use of professional writers                                                                                                                                                                                                      | N/A   |
|                               | 31c | Plans, if any, for granting public access to the full protocol, participant-level dataset, and statistical code                                                                                                                                                                     | 12    |

1  
2  
3  
4  
5  
6  
7  
8  
9  
10  
11  
12  
13  
14  
15  
16  
17  
18  
19  
20  
21  
22  
23  
24  
25  
26  
27  
28  
29  
30  
31  
32  
33  
34  
35  
36  
37  
38  
39  
40  
41  
42  
43  
44  
45  
46

|                            |    |                                                                                                                                                                                                |                          |
|----------------------------|----|------------------------------------------------------------------------------------------------------------------------------------------------------------------------------------------------|--------------------------|
| <b>Appendices</b>          |    |                                                                                                                                                                                                |                          |
| Informed consent materials | 32 | Model consent form and other related documentation given to participants and authorised surrogates                                                                                             | Supplementary Files 1, 2 |
| Biological specimens       | 33 | Plans for collection, laboratory evaluation, and storage of biological specimens for genetic or molecular analysis in the current trial and for future use in ancillary studies, if applicable | 9                        |

\*It is strongly recommended that this checklist be read in conjunction with the SPIRIT 2013 Explanation & Elaboration for important clarification on the items. Amendments to the protocol should be tracked and dated. The SPIRIT checklist is copyrighted by the SPIRIT Group under the Creative Commons "Attribution-NonCommercial-NoDerivs 3.0 Unported" license.

## WHO Trial Registration Data Set

|                                                  |                                                                                                                                                                                                       |
|--------------------------------------------------|-------------------------------------------------------------------------------------------------------------------------------------------------------------------------------------------------------|
| 1. Primary Registry and Trial Identifying Number | Clinicaltrial.gov<br>Registration submitted, pending approval                                                                                                                                         |
| 2. Date of Registration in Primary Registry      | Clinicaltrial.gov<br>Registration submitted, pending approval                                                                                                                                         |
| 3. Secondary Identifying Numbers                 | None                                                                                                                                                                                                  |
| 4. Source(s) of Monetary or Material Support     | The Everion® wearable devices are donated by Biofourmis Singapore, and Harmony ltd. The mobile phone and cellular data are supported by PCCW ltd.                                                     |
| 5. Primary Sponsor                               | None                                                                                                                                                                                                  |
| 6. Secondary Sponsor(s)                          | None                                                                                                                                                                                                  |
| 7. Contact for Public Queries                    | Professor Ivan FN Hung MD<br>Division of Infectious Diseases,<br>Department of Medicine,<br>The University of Hong Kong,<br>Hong Kong SAR, China.<br><br>Tel: (852) 2255 4049<br>Fax: (852) 2818 6304 |



|                                               |                                                                                                                                                                                                                                                                                                                  |
|-----------------------------------------------|------------------------------------------------------------------------------------------------------------------------------------------------------------------------------------------------------------------------------------------------------------------------------------------------------------------|
|                                               | E-mail: <a href="mailto:ivanhung@hku.hk">ivanhung@hku.hk</a>                                                                                                                                                                                                                                                     |
| 8. Contact for Scientific Queries             | Professor Ivan FN Hung MD<br>Division of Infectious Diseases,<br>Department of Medicine,<br>The University of Hong Kong,<br>Hong Kong SAR, China.<br><br>Tel: (852) 2255 4049<br>Fax: (852) 2818 6304<br>E-mail: <a href="mailto:ivanhung@hku.hk">ivanhung@hku.hk</a>                                            |
| 9. Public Title                               | Using Biovitals® Sentinel to Monitor Disease Progression in Subjects Quarantined for Suspected COVID-19                                                                                                                                                                                                          |
| 10. Scientific Title                          | Using Biovitals® Sentinel to Monitor Disease Progression in Subjects Quarantined for Suspected COVID-19                                                                                                                                                                                                          |
| 11. Countries of Recruitment                  | Hong Kong, China                                                                                                                                                                                                                                                                                                 |
| 12. Health Condition(s) or Problem(s) Studied | Coronavirus Disease 2019 (COVID-19)                                                                                                                                                                                                                                                                              |
| 13. Intervention                              | <u>Intervention Arm:</u><br>Continuous physiological monitoring using Biovitals platform including (1) Armband with multiple physiological sensor, (2) Remote monitoring, and (3) Analytic platform. The armband will be worn for 23 hours a day and off for 1 hour during showering for recharging the battery. |

|                                                 |                                                                                                                                                                                                                                                                                                                                                                                                                                                                                                                                                                                                                                                  |
|-------------------------------------------------|--------------------------------------------------------------------------------------------------------------------------------------------------------------------------------------------------------------------------------------------------------------------------------------------------------------------------------------------------------------------------------------------------------------------------------------------------------------------------------------------------------------------------------------------------------------------------------------------------------------------------------------------------|
|                                                 | <p><u>Control Arm:</u><br/>Standard Care</p>                                                                                                                                                                                                                                                                                                                                                                                                                                                                                                                                                                                                     |
| <p>14. Key Inclusion and Exclusion Criteria</p> | <p><u>Inclusion criteria:</u><br/>Age ≥ 18 years<br/>Asymptomatic for COVID-19 pneumonia<br/>With close COVID-19 contact under mandatory quarantine at designated facilities in Hong Kong<br/>Voluntarily agrees to participate by providing written informed consent</p> <p><u>Exclusion criteria:</u><br/>Symptoms suggestive of COVID-19 infection including fever, upper respiratory symptoms, and/or gastrointestinal symptoms at recruitment.<br/>Confirmed COVID-19 infection<br/>Planned laboratory test for COVID-19<br/>Inability or refusal to provide informed consent<br/>Lack of skills in operating simple electronic devices</p> |
| <p>15. Study Type</p>                           | <p>Study Type: Interventional<br/>Participants Allocation: Randomized (details in protocol manuscript)<br/>Intervention Model: Parallel Assignment</p>                                                                                                                                                                                                                                                                                                                                                                                                                                                                                           |

|                              |                                                                                                                                                                                                                                                                                                                                                                                                                                                                                       |
|------------------------------|---------------------------------------------------------------------------------------------------------------------------------------------------------------------------------------------------------------------------------------------------------------------------------------------------------------------------------------------------------------------------------------------------------------------------------------------------------------------------------------|
|                              | Masking: None (Open Label)<br>Primary Purpose: Diagnostic                                                                                                                                                                                                                                                                                                                                                                                                                             |
| 16. Date of First Enrollment | March 16, 2020                                                                                                                                                                                                                                                                                                                                                                                                                                                                        |
| 17. Target Sample Size       | 200 – 1000                                                                                                                                                                                                                                                                                                                                                                                                                                                                            |
| 18. Recruitment Status       | Pending                                                                                                                                                                                                                                                                                                                                                                                                                                                                               |
| 19. Primary Outcome(s)       | Time to diagnosis of COVID-19 by RT-PCR in subjects<br>Metric: Time from quarantine to diagnosis of COVID-19<br>Time Frame: within 14 days                                                                                                                                                                                                                                                                                                                                            |
| 20. Key Secondary Outcome(s) | 1. Compliance to complete the study<br>Metric: Percentage of device usage time<br>Time Frame: within 14 days<br><br>Sensitivity and specificity of Biovitals® Sentinel to identify COVID-19 positive subjects<br>Metric: Sensitivity and specificity of Biovitals® Sentinel to identify COVID-19 positive subjects<br>Time Frame: within 14 days<br><br>Viral load of COVID-19 positive subjects<br>Metric: COVID-19 viral load by RT-PCR<br>Time Frame: On day of COVID-19 diagnosis |

|    |                                                            |
|----|------------------------------------------------------------|
| 1  |                                                            |
| 2  |                                                            |
| 3  |                                                            |
| 4  |                                                            |
| 5  | Cross infection rate within the family cluster             |
| 6  | Metric: Percentage of family members infected              |
| 7  | Time Frame: within 14 days                                 |
| 8  |                                                            |
| 9  |                                                            |
| 10 |                                                            |
| 11 | Length of hospital stay of positive subjects               |
| 12 | Metric: Length of hospital stay                            |
| 13 | Time Frame: 1 year at study completion                     |
| 14 |                                                            |
| 15 |                                                            |
| 16 |                                                            |
| 17 |                                                            |
| 18 | Length of ICU stay of positive patients                    |
| 19 | Metric: Length of ICU stay                                 |
| 20 | Time Frame: 1 year at study completion                     |
| 21 |                                                            |
| 22 |                                                            |
| 23 |                                                            |
| 24 |                                                            |
| 25 | Non-invasive and invasive ventilatory support              |
| 26 | Metric: Percentage of COVID-19 positive patients requiring |
| 27 | non-invasive and invasive ventilatory support              |
| 28 | Time Frame: 1 year at study completion                     |
| 29 |                                                            |
| 30 |                                                            |
| 31 |                                                            |
| 32 |                                                            |
| 33 | National Early Warning Score 2 rating of COVID-19 positive |
| 34 | patients                                                   |
| 35 | Metric: National Early Warning Score 2 rating              |
| 36 | Time Frame: On day of COVID-19 diagnosis                   |
| 37 |                                                            |
| 38 |                                                            |
| 39 |                                                            |
| 40 |                                                            |

1  
2  
3  
4  
5  
6  
7  
8  
9  
10  
11  
12  
13  
14  
15  
16  
17  
18  
19  
20  
21  
22  
23  
24  
25  
26  
27  
28  
29  
30  
31  
32  
33  
34  
35  
36  
37  
38  
39  
40  
41  
42  
43  
44  
45  
46

1  
2  
3  
4  
5  
6  
7  
8  
9  
10  
11  
12  
13  
14  
15  
16  
17  
18  
19  
20  
21  
22  
23  
24  
25  
26  
27  
28  
29  
30  
31  
32  
33  
34  
35  
36  
37  
38  
39  
40  
41  
42  
43  
44  
45  
46

|  |                                        |
|--|----------------------------------------|
|  | Worsening of comorbidities             |
|  | Metric: Worsening of comorbidities     |
|  | Time Frame: 1 year at study completion |
|  | Mortality                              |
|  | Metric: Mortality                      |
|  | Time Frame: 1 year at study completion |

For peer review only
